# Supplementary material for: Synthesis of N-acyl carbazoles, phenoxazines and acridines from cyclic diaryliodonium salts
Source: publisher site journal article supplement (doi:10.3762/bjoc.20.2), 2024-01-04
Supplement: Additional file 1 [file 1860-5397-20-2-S1.pdf]

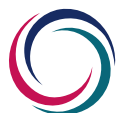

## Supporting Information

for

### Synthesis of *N*-acyl carbazoles, phenoxazines and acridines from cyclic diaryliodonium salts

Nils Clamor, Mattis Damrath, Thomas J. Kuczmera, Daniel Duvinage and Boris J. Nachtsheim

*Beilstein J. Org. Chem.* **2024**, *20*, 12–16. doi:10.3762/bjoc.20.2

## Experimental part

## Table of Contents

|                                                                                              |     |
|----------------------------------------------------------------------------------------------|-----|
| General information .....                                                                    | S1  |
| Synthesis of <i>N</i> -Acylcarbazoles .....                                                  | S2  |
| GP1: General procedure for the synthesis of <i>N</i> -Acylcarbazoles <b>2</b> .....          | S2  |
| GP2 Synthesis of dibenzo[ <i>b,d</i> ]iodol-5-ium trifluoromethanesulfonates <b>1</b> .....  | S2  |
| Dibenzo[ <i>b,d</i> ]iodol-5-ium trifluoromethanesulfonate ( <b>1a</b> ).....                | S3  |
| 3-Cyanodibenzo[ <i>b,d</i> ]iodol-5-ium trifluoromethanesulfonate ( <b>1s</b> ).....         | S3  |
| 2-Bromo-7-cyanodibenzo[ <i>b,d</i> ]iodol-5-ium trifluoromethanesulfonate ( <b>1t</b> )..... | S3  |
| 1-(9 <i>H</i> -Carbazol-9-yl)pentan-1-one ( <b>2a</b> ) .....                                | S4  |
| (9 <i>H</i> -Carbazol-9-yl)(phenyl)methanone ( <b>2b</b> ).....                              | S4  |
| (9 <i>H</i> -Carbazol-9-yl)(4-fluorophenyl)methanone ( <b>2c</b> ).....                      | S4  |
| (9 <i>H</i> -Carbazol-9-yl)(4-(trifluoromethyl)phenyl)methanone ( <b>2d</b> ).....           | S5  |
| (4-Bromophenyl)(9 <i>H</i> -carbazol-9-yl)methanone ( <b>2e</b> ).....                       | S5  |
| (9 <i>H</i> -Carbazol-9-yl)(4-chlorophenyl)methanone ( <b>2f</b> ).....                      | S5  |
| (9 <i>H</i> -Carbazol-9-yl)(4-nitrophenyl)methanone ( <b>2g</b> ).....                       | S6  |
| (9 <i>H</i> -Carbazol-9-yl)(4-methoxyphenyl)methanone ( <b>2h</b> ) .....                    | S6  |
| Methyl 4-(9 <i>H</i> -carbazole-9-carbonyl)benzoate ( <b>2i</b> ) .....                      | S6  |
| (3-Bromophenyl)(9 <i>H</i> -carbazol-9-yl)methanone ( <b>2j</b> ) .....                      | S7  |
| (2-Bromophenyl)(9 <i>H</i> -carbazol-9-yl)methanone ( <b>2k</b> ) .....                      | S7  |
| (3,5-Bis(trifluoromethyl)phenyl)(9 <i>H</i> -carbazol-9-yl)methanone ( <b>2l</b> ).....      | S7  |
| (9 <i>H</i> -Carbazol-9-yl)(3,5-dibromophenyl)methanone ( <b>2m</b> ).....                   | S8  |
| (9 <i>H</i> -Carbazol-9-yl)(3,5-dimethoxyphenyl)methanone ( <b>2n</b> ) .....                | S8  |
| (9 <i>H</i> -Carbazol-9-yl)(mesityl)methanone ( <b>2o</b> ) .....                            | S8  |
| (9 <i>H</i> -Carbazol-9-yl)(3,4,5-trimethoxyphenyl)methanone ( <b>2p</b> ) .....             | S9  |
| Ethyl 9 <i>H</i> -carbazole-9-carboxylate ( <b>2q</b> ).....                                 | S9  |
| 1-(9 <i>H</i> -Carbazol-9-yl)-2-phenylethan-1-one ( <b>2r</b> ) .....                        | S9  |
| 9-(2,4,6-Trimethylbenzoyl)-9 <i>H</i> -carbazole-2-carbonitrile ( <b>2s</b> ) .....          | S10 |
| 6-Bromo-9-(2,4,6-trimethylbenzoyl)-9 <i>H</i> -carbazole-2-carbonitrile ( <b>2t</b> ) .....  | S10 |
| Acridin-10(9 <i>H</i> )-yl(mesityl)methanone ( <b>3a</b> ).....                              | S10 |
| Mesityl(10 <i>H</i> -phenoxazin-10-yl)methanone ( <b>3b</b> ).....                           | S11 |
| Mesityl(2-methyl-10 <i>H</i> -phenoxazin-10-yl)methanone ( <b>3c</b> ).....                  | S11 |
| (2-Bromo-10 <i>H</i> -phenoxazin-10-yl)(mesityl)methanone ( <b>3d</b> ) .....                | S12 |
| 10-(2,4,6-Trimethylbenzoyl)-10 <i>H</i> -phenoxazine-2-carbonitrile ( <b>3e</b> ) .....      | S12 |
| (6 <i>H</i> -Imidazo[4,5,1- <i>de</i> ]henazine-6-yl)(phenyl)methanone ( <b>3f</b> ).....    | S12 |
| NMR-Spectra.....                                                                             | S14 |
| 2-Bromo-7-cyanodibenzo[ <i>b,d</i> ]iodol-5-ium trifluoromethanesulfonate ( <b>1t</b> )..... | S14 |

|                                                                                             |     |
|---------------------------------------------------------------------------------------------|-----|
| (4-Bromophenyl)(9 <i>H</i> -carbazol-9-yl)methanone ( <b>2e</b> ).....                      | S15 |
| (9 <i>H</i> -Carbazol-9-yl)(4-nitrophenyl)methanone( <b>2g</b> ).....                       | S16 |
| Methyl 4-(9 <i>H</i> -carbazole-9-carbonyl)benzoate ( <b>2i</b> ) .....                     | S17 |
| (3-Bromophenyl)(9 <i>H</i> -carbazol-9-yl)methanone ( <b>2j</b> ) .....                     | S18 |
| (2-Bromophenyl)(9 <i>H</i> -carbazol-9-yl)methanone ( <b>2k</b> ) .....                     | S19 |
| 3,5-Bis(trifluoromethyl)phenyl)(9 <i>H</i> -carbazol-9-yl)methanone ( <b>2l</b> ) .....     | S20 |
| (9 <i>H</i> -Carbazol-9-yl)(3,5-dibromophenyl)methanone ( <b>2m</b> ).....                  | S22 |
| (9 <i>H</i> -Carbazol-9-yl)(3,5-dimethoxyphenyl)methanone ( <b>2n</b> ) .....               | S23 |
| (9 <i>H</i> -Carbazol-9-yl)(mesityl)methanone ( <b>2o</b> ) .....                           | S24 |
| (9 <i>H</i> -Carbazol-9-yl)(3,4,5-trimethoxyphenyl)methanone ( <b>2p</b> ) .....            | S25 |
| 1-(9 <i>H</i> -Carbazol-9-yl)-2-phenylethan-1-one ( <b>2r</b> ) .....                       | S26 |
| 9-(2,4,6-Trimethylbenzoyl)-9 <i>H</i> -carbazole-2-carbonitrile ( <b>2s</b> ) .....         | S27 |
| 6-Bromo-9-(2,4,6-trimethylbenzoyl)-9 <i>H</i> -carbazole-2-carbonitrile ( <b>2t</b> ) ..... | S28 |
| Acridin-10(9 <i>H</i> )-yl(mesityl)methanone ( <b>3a</b> ).....                             | S29 |
| Mesityl(10 <i>H</i> -phenoxazin-10-yl)methanone ( <b>3b</b> ).....                          | S30 |
| Mesityl(2-methyl-10 <i>H</i> -phenoxazin-10-yl)methanone ( <b>3c</b> ).....                 | S31 |
| (2-Bromo-10 <i>H</i> -phenoxazin-10-yl)(mesityl)methanone ( <b>3d</b> ) .....               | S32 |
| 10-(2,4,6-Trimethylbenzoyl)-10 <i>H</i> -phenoxazine-2-carbonitrile ( <b>3e</b> ) .....     | S33 |
| (6 <i>H</i> -Imidazo[4,5,1- <i>de</i> ]phenazin-6-yl)(phenyl)methanone ( <b>3f</b> ) .....  | S34 |
| Crystallographic data .....                                                                 | S35 |

## General information

Unless otherwise noted, water- or oxygen-sensitive reactions were carried out under Argon atmosphere using standard Schlenck techniques. All chemicals were purchased from commercial suppliers (abcr, Acros Organics, Alfa Aesar, Apollo Scientific, Carbolution Chemicals, Fluorochem, Sigma Aldrich, TCI) and either used as received or purified according to Purification of Common Laboratory Chemicals. Dry solvents were obtained from an inert PS-MD-6 solvent purification system, xylene was dried by filtering through anhydrous Alumina and stored over 4 Å molecular sieves. Degassing of Xylene was achieved by sparging with Argon. Yields refer to isolated yields of compounds estimated to be >95% pure as determined by <sup>1</sup>H-NMR spectroscopy.

Thin layer chromatography was performed on fluorescence indicator marked precoated silica gel 60 plates (Macherey-Nagel, ALUGRAM Xtra SIL G/UV254) and visualized by UV light (254 nm/366 nm). Flash column chromatography was performed on silica gel (0.040 – 0.063 mm) with the solvents given in the procedures.

Reactions that required heating were either heated using an oil bath, if the reaction was performed in a flask or in a heating block, if the reaction was performed in a screw cap vial.

<sup>1</sup>H- and <sup>13</sup>C-NMR spectra were recorded on Bruker Avance 360NB and Bruker AvanceNeo600-spectrometers. Chemical shifts for <sup>1</sup>H-NMR spectra were reported as δ (parts per million) relative to the residual signal of CHCl<sub>3</sub> at 7.26 ppm (s) or d<sub>6</sub>-DMSO at 2.50 ppm (quin). Chemical shifts for <sup>13</sup>C-NMR spectra were reported as δ (parts per million) relative to the signal of CDCl<sub>3</sub> at 77.0 ppm (t) or d<sub>6</sub>-DMSO at 39.5 ppm (sept.). The following abbreviations were used to describe splitting patterns: br = broad, s = singlet, d = doublet, t = triplet, q = quartet, quin = quintet, sept = septet, m = multiplet. Coupling constants J are given in Hertz.

High resolution (HR) EI mass spectra were recorded on the double focussing mass spectrometer ThermoQuest MAT 95 XL from Finnigan MAT. APCI mass spectra were recorded on a Advion Expression CMSL via ASAP probe or direct inlet. HR-ESI and APCI mass spectra were recorded on a Bruker impact II. All signals were reported with the quotient from mass to charge m/z. IR spectra were recorded on a Nicolet Thermo iS10 scientific spectrometer with a diamond ATR unit. The absorption bands were reported in cm<sup>-1</sup>. Melting points were determined on a Büchi M-5600 Melting Point apparatus with a heating rate of 5 °C/min. The melting points were reported in °C. X-ray diffractometry was carried out in a Bruker Venture D8. Single Crystals were obtained *via* recrystallization from Cyclohexane/Ethyl acetate mixtures.

# Synthesis of *N*-Acylcarbazoles

## GP1: General procedure for the synthesis of *N*-Acylcarbazoles 2

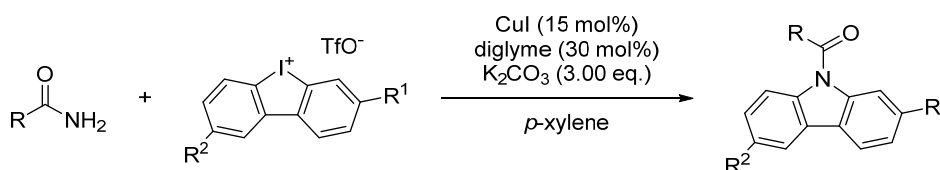

In a heat gun-dried and argon-flushed Schlenk-tube,  $CuI$  (5.7 mg, 30.0  $\mu$ mol, 0.15 equiv.) was suspended in dried and degassed *p*-xylene (2.0 mL, 100 mM) and diglyme (8.59  $\mu$ L, 60.0  $\mu$ mol, 0.30 equiv.) was added. The mixture was stirred for 10 min at 80  $^\circ C$  in an oil bath. Amide (200  $\mu$ mol, 1.00 equiv.) iodonium salt **1** (400  $\mu$ mol, 2.00 equiv.) and  $K_2CO_3$  (82.9 mg, 600  $\mu$ mol, 3.00 equiv.) were added and the oil bath was heated to 120  $^\circ C$ . Upon reaching 120  $^\circ C$ , the reaction vessel was sealed and the mixture was stirred vigorously for 18 h. Completion of the reaction was verified *via* TLC and after the starting material was consumed, the mixture was allowed to cool to room temperature and saturated aqueous solution of  $NaHCO_3$  (2 mL) was added.

Phases were separated and The aqueous phase was extracted with EtOAc (4 x 2 mL). The combined organic phases were dried over  $Na_2SO_4$  and solvents were removed under reduced pressure. Column chromatography ( $SiO_2$  / Cyclohexane: EtOAc) was carried out to yield products.

## GP2 Synthesis of dibenzo[*b,d*]iodol-5-ium trifluoromethanesulfonates **1**

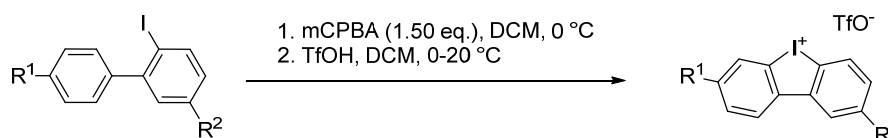

In a modified literature procedure[1] 2-iodobiphenyls were dissolved in DCM (0.4 M) and cooled in an ice bath. *m*CPBA (1.50 equiv. 60 wt %) was added to the stirred solution and the reaction was stirred under cooling. Upon consumption of the starting material, TfOH (2.00 equiv.) was added to the reaction dropwise, and the reaction was allowed to reach room temperature. The mixture was concentrated *in vacuo*, and Diethyl ether was added to precipitate the product. The products may be purified *via* column chromatography ( $SiO_2/DCM:MeOH$ ) followed by dissolving in MeOH and precipitation with  $Et_2O$ .

### Dibenzo[*b,d*]iodol-5-ium trifluoromethanesulfonate (1a)

Synthesized according to **GP2** from 2-iodo-1,1'-biphenyl (600 mg, 2.14 mmol, 1.00 equiv.). Column chromatography (SiO<sub>2</sub> / DCM:MeOH (95:5 (v:v))) followed by precipitation from MeOH by addition of Et<sub>2</sub>O gave the product as an off-white solid (817 mg, 1.91 mmol, 89%)

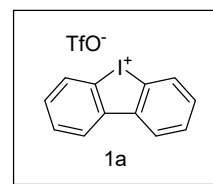

**<sup>1</sup>H NMR (360 MHz, DMSO-*d*<sub>6</sub>):**  $\delta$  = 8.55 – 8.41 (m, 2H), 8.27 – 8.13 (m, 2H), 7.93 – 7.79 (m, 2H), 7.71 (td, *J* = 8.0, 2.2 Hz, 2H) ppm. **<sup>13</sup>C NMR (91 MHz, DMSO-*d*<sub>6</sub>):**  $\delta$  = 141.7, 131.1, 130.7, 130.6, 127.0, 121.6 ppm Signal for TfO<sup>-</sup> was not observed; **<sup>19</sup>F NMR (565 MHz, DMSO-*d*<sub>6</sub>):**  $\delta$  = -77.8 ppm; **FTIR (ATR, neat, cm<sup>-1</sup>):**  $\tilde{\nu}$  = 3093 (w), 3005 (w), 1586 (w), 1457 (m), 1443 (m), 1269 (s), 1233 (s), 1221 (s), 1177 (m), 1157 (m), 1025 (m); **MS(APCI):** *m/z* = 278.8 [M-TfO]<sup>+</sup> Mp: 238-242°C; The analytical data is in accordance with the literature[1]

### 3-Cyanodibenzo[*b,d*]iodol-5-ium trifluoromethanesulfonate (1s)

Synthesized according to **GP2** from 2'-iodo-[1,1'-biphenyl]-4-carbonitrile (350 mg, 1.15 mmol, 1.00 equiv.). Column chromatography (SiO<sub>2</sub>/ DCM:MeOH) followed by precipitation from MeOH by addition of Et<sub>2</sub>O gave the product as an off-white solid (374 mg, 826 μmol, 72%)

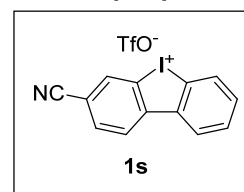

**<sup>1</sup>H NMR (600 MHz, DMSO-*d*<sub>6</sub>):**  $\delta$  = 8.7 (d, *J* = 8.3 Hz, 1H), 8.6 (dd, *J* = 8.0, 1.6 Hz, 1H), 8.5 (d, *J* = 1.6 Hz, 1H), 8.4 (dd, *J* = 8.2, 1.6 Hz, 1H), 8.3 – 8.2 (m, 1H), 8.0 – 7.9 (m, 1H), 7.8 (ddd, *J* = 8.6, 7.2, 1.4 Hz, 1H) ppm; **<sup>13</sup>C NMR (151 MHz, DMSO-*d*<sub>6</sub>):**  $\delta$  = 146.5, 140.8, 134.8, 134.7, 133.0, 131.4, 131.1, 128.7, 127.8, 123.8, 122.3, 118.0, 112.9 ppm Signal for TfO<sup>-</sup> was not observed; **<sup>19</sup>F NMR (565 MHz, DMSO-*d*<sub>6</sub>):**  $\delta$  = -77.8 ppm; **FTIR (ATR, neat, cm<sup>-1</sup>):**  $\tilde{\nu}$  = 3099 (w), 2323 (w), 1770 (w), 1585 (w), 1456 (m), 1439 (w), 1394 (w), 1270 (m), 1247 (s), 1223 (s), 1161 (s); **MS(APCI):** *m/z* = 304.0 [M-TfO]<sup>+</sup> Mp: decomp>288°C; The analytical data is in accordance with the literature[2]

### 2-Bromo-7-cyanodibenzo[*b,d*]iodol-5-ium trifluoromethanesulfonate (1t)

Synthesized according to **GP2** from 5'-bromo-2'-iodo-[1,1'-biphenyl]-4-carbonitrile (827 mg, 2.15 mmol, 1.00 equiv.). Column chromatography (SiO<sub>2</sub>/ DCM:MeOH) followed by precipitation from MeOH by addition of Et<sub>2</sub>O gave the product as a colourless solid (962 mg, 1.81 mmol, 84%)

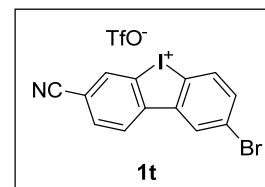

**<sup>1</sup>H NMR (600 MHz, CDCl<sub>3</sub>):**  $\delta$  = 8.89 (d, *J* = 2.1 Hz, 1H), 8.75 (d, *J* = 8.3 Hz, 1H), 8.52 (d, *J* = 1.5 Hz, 1H), 8.34 (dd, *J* = 8.2, 1.5 Hz, 1H), 8.13 (d, *J* = 8.7 Hz, 1H), 7.97 (dd, *J* = 8.7, 2.1 Hz, 1H) ppm; **<sup>13</sup>C NMR (151 MHz, DMSO-*d*<sub>6</sub>):**  $\delta$  = 144.7, 142.5, 134.9, 134.4, 134.1, 132.3, 130.7, 127.9, 125.1, 122.3, 122.0, 117.4, 113.0 ppm Signal for TfO<sup>-</sup> was not observed; **<sup>19</sup>F NMR (565 MHz, DMSO-*d*<sub>6</sub>):**  $\delta$  = -77.7 ppm; **FTIR (ATR, neat, cm<sup>-1</sup>):**

$\tilde{\nu}$  = 3106 (w), 2238 (w), 1759 (w), 1551 (w), 1474 (w), 1448 (w), 1383 (w), 1275 (s), 1241 (s), 1221 (s); **HR-MS (ESI)**: m/z [M-TfO]<sup>+</sup> calcd. for: C<sub>16</sub>H<sub>6</sub>BrIN<sup>+</sup>: 381.8723, found 381.8716; Mp: decomp > 330 °C

### 1-(9H-Carbazol-9-yl)pentan-1-one (2a)

Prepared according to **GP1** from Valeramide (20.2 mg, 200 μmol, 1.00 equiv.) and **1a** (171 mg, 400 μmol, 2.00 equiv.). Column chromatography (SiO<sub>2</sub>/Cyclohexane:EtOAc 97:3 (V:V)) gave the product as a colourless solid (37.3 mg, 148 μmol, 74%)

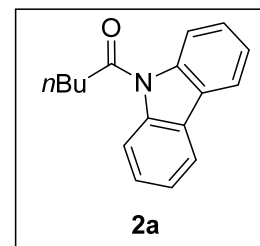

**<sup>1</sup>H NMR (600 MHz, CDCl<sub>3</sub>)**: δ = 8.23 (d, *J* = 8.4 Hz, 2H), 8.01 (dt, *J* = 7.6, 1.0 Hz, 2H), 7.49 (ddd, *J* = 8.5, 7.3, 1.4 Hz, 2H), 7.39 (td, *J* = 7.5, 0.9 Hz, 2H), 3.25 – 3.09 (m, 2H), 1.93 (dd, *J* = 8.3, 6.6 Hz, 2H), 1.65 – 1.50 (m, 2H), 1.03 (t, *J* = 7.4 Hz, 3H) ppm; **<sup>13</sup>C NMR (151 MHz, CDCl<sub>3</sub>)**: δ = 173.5, 138.7, 127.4, 126.5, 123.7, 119.9, 116.6, 39.0, 26.9, 22.5, 14.1 ppm; **FTIR (ATR, neat, cm<sup>-1</sup>)**:  $\tilde{\nu}$  = 3062 (w), 3028 (w); **MS (APCI)**: m/z = 252.2 [M+H]<sup>+</sup>; **Mp.**: T = 85.4-85.6 °C; The analytical data is in accordance with the literature[3]

### (9H-Carbazol-9-yl)(phenyl)methanone (2b)

Prepared according to **GP1** from Benzamide (24.2 mg, 200 μmol, 1.00 equiv.) and **1a** (171 mg, 400 μmol, 2.00 equiv.). Column chromatography (SiO<sub>2</sub>/Cyclohexane:EtOAc 97:3 (V:V)) gave the product as colourless solid (46.1 mg, 170 μmol, 85%).

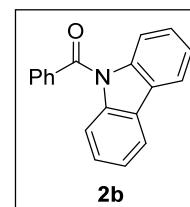

**<sup>1</sup>H NMR (600 MHz, CDCl<sub>3</sub>)**: δ = 8.04 – 7.99 (m, 2H), 7.73 (dd, *J* = 8.2, 1.3 Hz, 2H), 7.69 – 7.63 (m, 1H), 7.57 – 7.49 (m, 4H), 7.44 – 7.29 (m, 4H) ppm; **<sup>13</sup>C NMR (151 MHz, CDCl<sub>3</sub>)**: δ = 169.8, 139.3, 135.9, 132.5, 129.2, 129.0, 126.9, 126.2, 123.5, 120.0, 115.9 ppm; **FTIR (ATR, neat, cm<sup>-1</sup>)**:  $\tilde{\nu}$  = 3062 (w), 3028 (w), 1911 (w), 1675 (s), 1440 (s), 1327 (m), 1301 (m), 1231 (m), 1070 (m); **MS (APCI)**: m/z = 272.2 [M+H]<sup>+</sup> **Mp.**: T = 99.3-100.4 °C; The analytical data is in accordance with the literature[4]

### (9H-Carbazol-9-yl)(4-fluorophenyl)methanone (2c)

Prepared according to **GP1** from 4-fluorobenzamide (27.8 mg, 200 μmol, 1.00 equiv.) and **1a** (171 mg, 400 μmol, 2.00 equiv.). Column chromatography (SiO<sub>2</sub>/Cyclohexane:EtOAc 97:3 (V:V)) gave the product as a colourless solid (50.1 mg, 173 μmol, 87%)

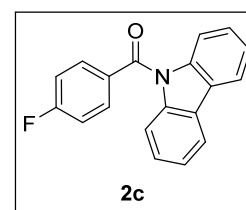

**<sup>1</sup>H NMR (600 MHz, CDCl<sub>3</sub>)**: δ = 8.04 – 7.99 (m, 2H), 7.76 (dd, *J* = 8.8, 5.3 Hz, 2H), 7.55 – 7.48 (m, 2H), 7.43 – 7.29 (m, 4H), 7.24 – 7.18 (m, 4H) ppm; **<sup>13</sup>C NMR (151 MHz, CDCl<sub>3</sub>)**: δ = 168.6, 166.2, 164.6, 139.2, 132.0 (d, *J* = 8.9 Hz), 126.9, 126.2, 123.6, 120.1, 116.3 (d, *J* = 22.1 Hz), 115.8 ppm; **<sup>19</sup>F NMR (565 MHz, CDCl<sub>3</sub>)**: δ = -105.5 ppm; **FTIR (ATR, neat, cm<sup>-1</sup>)**:  $\tilde{\nu}$  = 3116 (w), 3061 (w), 2962 (w), 2922 (w), 2851 (w), 1915 (w), 1682 (s), 1601 (s), 1507 (m), 1444 (m), 1324 (s); **MS (APCI)**: m/z = 290.2 [M+H]<sup>+</sup>; **Mp.**: T = 142-143 °C; Analytical data are in accordance to the literature[5, 6]

### (9H-Carbazol-9-yl)(4-(trifluoromethyl)phenyl)methanone (2d)

Prepared according to **GP1** from 4-(trifluoromethyl)benzamide (37.8 mg, 200  $\mu$ mol, 1.00 equiv.) and **1a** (171 mg, 400  $\mu$ mol, 2.00 equiv.). Column chromatography (SiO<sub>2</sub>/Cyclohexane:EtOAc 97:3 (V:V)) gave the product as a colourless solid (59.1 mg, 174  $\mu$ mol, 87%)

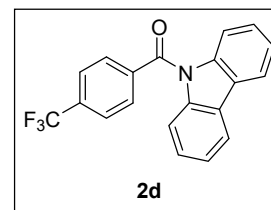

**<sup>1</sup>H NMR (600 MHz, CDCl<sub>3</sub>):**  $\delta$  = 8.02 (ddd,  $J$  = 7.7, 1.5, 0.7 Hz, 2H), 7.86 – 7.77 (m, 4H), 7.52 – 7.46 (m, 2H), 7.41 – 7.32 (m, 4H) ppm; **<sup>13</sup>C NMR (151 MHz, CDCl<sub>3</sub>):**  $\delta$  = 168.1, 139.1, 138.8, 133.9 (q,  $J$  = 33.0 Hz), 129.4, 127.0, 126.3, 126.0 (d,  $J$  = 3.7 Hz), 123.9, 120.0, 115.8 ppm; **<sup>19</sup>F NMR (565 MHz, CDCl<sub>3</sub>):**  $\delta$  = -62.9 ppm; **FTIR (ATR, neat, cm<sup>-1</sup>):**  $\tilde{\nu}$  = 3050 (w), 2962 (w), 2924 (w), 1745 (m), 1676 (s), 1616 (w), 1585 (w), 1489 (w), 1477 (w), 1444 (m); **MS (APCI):**  $m/z$  = 340.0 [M]<sup>+</sup>; **Mp:** T = 144-145 °C; Analytical data are in accordance to the literature[7]

### (4-Bromophenyl)(9H-carbazol-9-yl)methanone (2e)

Prepared according to **GP1** from 4-bromobenzamide (40.0 mg, 200  $\mu$ mol, 1.00 equiv.) and **1a** (171 mg, 400  $\mu$ mol, 2.00 equiv.). Column chromatography (SiO<sub>2</sub>/Cyclohexane:EtOAc 97:3 (V:V)) gave the product as a colourless solid (58.3 mg, 166  $\mu$ mol, 83%) as well as 9H-Carbazole (2.4 mg, 14.4 mmol, 7%).

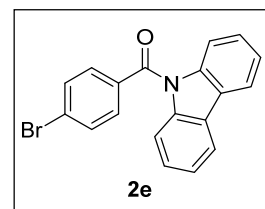

**<sup>1</sup>H NMR (600 MHz, CDCl<sub>3</sub>):**  $\delta$  = 8.06 – 7.98 (m, 2H), 7.68 (d,  $J$  = 8.5 Hz, 2H), 7.61 (d,  $J$  = 8.5 Hz, 2H), 7.56 – 7.50 (m, 2H), 7.42 – 7.30 (m, 4H) ppm; **<sup>13</sup>C NMR (151 MHz, CDCl<sub>3</sub>):**  $\delta$  = 168.7, 139.1, 134.6, 132.4, 130.9, 127.5, 127.0, 126.2, 123.8, 120.1, 115.8 ppm; **FTIR (ATR, neat, cm<sup>-1</sup>):**  $\tilde{\nu}$  = 3103 (w), 3033 (w), 1674 (s), 1587 (s), 1476 (m), 1440 (m), 1450 (m), 1352 (m), 1342 (w), 1299 (s); **HRMS (APCI):**  $m/z$  [M]<sup>+</sup> calcd. for: C<sub>19</sub>H<sub>12</sub>BrNO<sup>+</sup>  $m/z$  = 349.0097, found 349.0094; **Mp:** T = 154-155 °C; Analytical data are in accordance with the literature [8]

### (9H-Carbazol-9-yl)(4-chlorophenyl)methanone (2f)

Prepared according to **GP1** from 4-chlorobenzamide (31.1 mg, 200  $\mu$ mol, 1.00 equiv.) and **1a** (171 mg, 400  $\mu$ mol, 2.00 equiv.). Column chromatography (SiO<sub>2</sub>/Cyclohexane:EtOAc 97:3 (V:V)) gave the product as a colourless solid (46.7 mg, 153  $\mu$ mol, 76%) as well as 9H-Carbazole (5.70 mg, 34.1  $\mu$ mol, 14%)

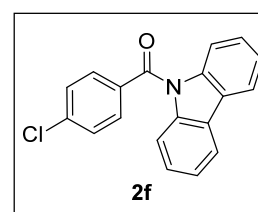

**<sup>1</sup>H NMR (600 MHz, CDCl<sub>3</sub>):**  $\delta$  = 8.04 – 8.00 (m, 2H), 7.68 (d,  $J$  = 8.5 Hz, 2H), 7.58 – 7.47 (m, 4H), 7.36 (m, 4H) ppm; **<sup>13</sup>C NMR (151 MHz, CDCl<sub>3</sub>):**  $\delta$  = 168.6, 139.1, 139.0, 134.1, 130.8, 129.4, 127.0, 126.2, 123.8, 120.1, 115.8 ppm; **FTIR (ATR, neat, cm<sup>-1</sup>):**  $\tilde{\nu}$  = 3084 (w), 3058 (w), 3042 (w), 1677 (s), 1590 (m), 1476 (m), 1450 (m), 1441 (s), 1326 (s), 1300 (s); **MS (APCI):**  $m/z$  = 306.0 [M+H]<sup>+</sup>; **Mp:** T = 156-157 °C; The analytical data are in accordance to the literature[9]



### (9*H*-Carbazol-9-yl)(4-nitrophenyl)methanone(2g)

Prepared according to **GP1** from 4-nitrobenzamide (33.2 mg, 200  $\mu$ mol, 1.00 equiv.) and **1a** (171 mg, 400  $\mu$ mol, 2.00 equiv.). Column chromatography (SiO<sub>2</sub>/Cyclohexane:EtOAc 97:3 (V:V)) gave the product as a colourless solid (50.1 mg, 158  $\mu$ mol, 79%)

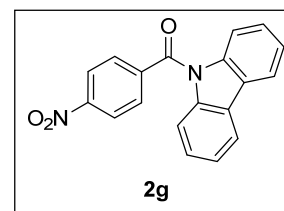

**<sup>1</sup>H NMR (600 MHz, CDCl<sub>3</sub>):**  $\delta$  = 8.43 – 8.34 (m, 2H), 8.03 (dt, *J* = 7.8, 1.0 Hz, 2H), 7.93 – 7.85 (m, 2H), 7.47 (d, *J* = 8.2 Hz, 2H), 7.40 (td, *J* = 7.4, 1.1 Hz, 2H), 7.34 (ddd, *J* = 8.5, 7.2, 1.3 Hz, 2H) ppm; **<sup>13</sup>C NMR (151 MHz, CDCl<sub>3</sub>):**  $\delta$  = 167.4, 150.0, 141.5, 138.8, 130.1, 127.3, 126.5, 124.4, 124.3, 120.3, 115.9, 110.7 ppm; **FTIR (ATR, neat, cm<sup>-1</sup>):**  $\tilde{\nu}$  = 3417 (w), 3105 (w), 3049 (w), 3049 (w), 2961 (w), 2853 (w), 1739 (m), 1674 (s), 1602 (m), 1523 (s), 1477 (m), 1443 (s); **HRMS (APCI):** *m/z* [M]<sup>+</sup>: calcd. For C<sub>15</sub>H<sub>13</sub>N<sub>2</sub>O<sub>3</sub><sup>+</sup>: 316.0842, found 316.0839; **Mp:** T = 153-154 °C;

### (9*H*-Carbazol-9-yl)(4-methoxyphenyl)methanone (2h)

Prepared according to **GP1** from 4-methoxybenzamide (30.2 mg, 200  $\mu$ mol, 1.00 equiv.) and **1a** (171 mg, 400  $\mu$ mol, 2.00 equiv.). Column chromatography (SiO<sub>2</sub>/Cyclohexane:EtOAc 97:3 (V:V)) gave the product as a colourless solid (50.4 mg, 167  $\mu$ mol, 84%)

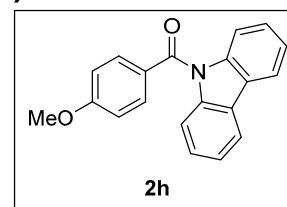

**<sup>1</sup>H NMR (600 MHz, CDCl<sub>3</sub>):**  $\delta$  = 8.05 – 7.99 (m, 1H), 7.76 – 7.71 (m, 1H), 7.58 – 7.53 (m, 1H), 7.38 – 7.32 (m, 2H), 7.00 (d, *J* = 8.8 Hz, 1H), 3.92 (s, 1H) ppm; **<sup>13</sup>C NMR (151 MHz, CDCl<sub>3</sub>):**  $\delta$  = 169.3, 163.4, 139.5, 131.9, 127.7, 126.7, 125.9, 123.2, 120.0, 115.7, 114.3, 55.7 ppm; **FTIR (ATR, neat, cm<sup>-1</sup>):**  $\tilde{\nu}$  = 3064 (w), 3010 (w), 2971 (w), 2840 (w), 1669 (s), 1602 (s), 1506 (m), 1489 (w), 1450 (w), 1441 (m); **MS (APCI):** *m/z* = 302.1 [M+H]<sup>+</sup>; **Mp:** T = 134-135 °C; Analytical data are in accordance to the literature.[7]

### Methyl 4-(9*H*-carbazole-9-carbonyl)benzoate (2i)

Prepared according to **GP1** from methyl 4-carbamoylbenzoate (35.8 mg, 200  $\mu$ mol, 1.00 equiv.) and **1a** (171 mg, 400  $\mu$ mol, 2.00 equiv.). Column chromatography (SiO<sub>2</sub>/Cyclohexane:EtOAc 97:3 (V:V)) gave the product as a colourless solid (59.2 mg, 180  $\mu$ mol, 90%)

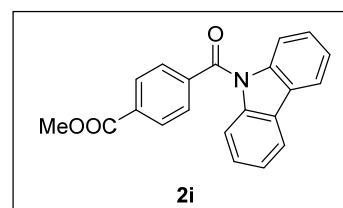

**<sup>1</sup>H NMR (600 MHz, CDCl<sub>3</sub>):**  $\delta$  = 8.23 (d, *J* = 8.5 Hz, 2H), 8.04 (ddd, *J* = 7.7, 1.4, 0.7 Hz, 2H), 7.81 (d, *J* = 8.4 Hz, 2H), 7.51 (d, *J* = 8.2 Hz, 2H), 7.39 (td, *J* = 7.5, 1.1 Hz, 2H), 7.34 (ddd, *J* = 8.5, 7.3, 1.4 Hz, 2H), 4.02 (s, 3H) ppm; **<sup>13</sup>C NMR (151 MHz, CDCl<sub>3</sub>):**  $\delta$  = 168.8, 166.3, 139.9, 139.0, 133.5, 130.3, 129.0, 127.1, 126.4, 123.9, 120.1, 116.0, 52.7 ppm; **FTIR (ATR, neat, cm<sup>-1</sup>):**  $\tilde{\nu}$  = 3042 (w), 3003 (w), 2951 (w), 1719 (s), 1675 (s), 1610 (w), 1478 (w), 1452 (m), 1443 (m), 1331 (s); **MS (APCI):** *m/z* = 330.0 [M+H]<sup>+</sup>; **Mp:** T = 119-121 °C; Analytical data are in accordance to the literature.[10]

### (3-Bromophenyl)(9H-carbazol-9-yl)methanone (2j)

Prepared according to **GP1** from 3-bromobenzamide (40.0 mg, 200  $\mu\text{mol}$ , 1.00 equiv.) and **1a** (171 mg, 400  $\mu\text{mol}$ , 2.00 equiv.). Column chromatography ( $\text{SiO}_2/\text{Cyclohexane}:\text{EtOAc}$  97:3 (V:V)) gave the product as a colourless wax (58.6 mg, 167  $\mu\text{mol}$ , 84%)

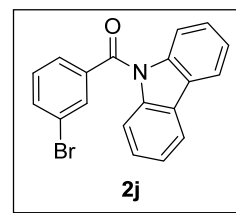

**$^1\text{H NMR}$  (600 MHz,  $\text{CDCl}_3$ ):**  $\delta$  = 8.04 – 7.99 (m, 2H), 7.89 (t,  $J$  = 1.7 Hz, 1H), 7.78 (ddd,  $J$  = 8.1, 2.0, 1.1 Hz, 1H), 7.62 (ddd,  $J$  = 7.7, 1.6, 1.0 Hz, 1H), 7.52 (dt,  $J$  = 7.8, 0.8 Hz, 2H), 7.44 – 7.32 (m, 5H) ppm;  **$^{13}\text{C NMR}$  (151 MHz,  $\text{CDCl}_3$ ):**  $\delta$  = 168.0, 139.1, 137.8, 135.5, 132.0, 130.6, 127.7, 127.1, 126.3, 123.9, 123.2, 120.1, 115.9 ppm; **FTIR (ATR, neat,  $\text{cm}^{-1}$ ):**  $\tilde{\nu}$  = 3046 (w), 3013 (w), 2962 (w), 2933 (w), 2868 (w), 1732 (m), 1678 (s), 1597 (w), 1566 (w), 1442 (s), 1416 (m); **HRMS (APCI):**  $m/z$  [ $\text{M}$ ] $^{+}$  calcd. for:  $\text{C}_{19}\text{H}_{12}\text{BrNO}^+$   $m/z$  = 349.0097, found 349.0096; The analytical data are in accordance with the literature. [11]

### (2-Bromophenyl)(9H-carbazol-9-yl)methanone (2k)

Prepared according to **GP1** from 2-bromobenzamide (40.0 mg, 200  $\mu\text{mol}$ , 1.00 equiv.) and **1a** (171 mg, 400  $\mu\text{mol}$ , 2.00 equiv.). Column chromatography ( $\text{SiO}_2/\text{Cyclohexane}:\text{EtOAc}$  97:3 (V:V)) gave the product as a colourless solid (38.8 mg, 111  $\mu\text{mol}$ , 55%)

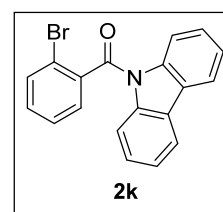

**$^1\text{H NMR}$  (600 MHz,  $\text{CDCl}_3$ ):**  $\delta$  = 8.0 (d,  $J$  = 7.7 Hz, 2H), 7.7 (d,  $J$  = 8.0 Hz, 1H), 7.6 – 7.4 (m, 4H), 7.4 – 7.3 (m, 5H) ppm;  **$^{13}\text{C NMR}$  (151 MHz,  $\text{CDCl}_3$ ):**  $\delta$  = 167.4, 138.6, 138.6, 133.8, 132.1, 129.0, 128.4, 127.5, 126.8, 124.3, 119.9, 116.0 ppm; **FTIR (ATR, neat,  $\text{cm}^{-1}$ ):**  $\tilde{\nu}$  = 3061 (w), 2958 (w), 2922 (w), 2852 (w), 1674 (s), 1598 (w), 1587 (m), 1489 (w), 1467 (m), 1443 (s), 1359 (s); **HRMS (APCI):**  $m/z$  [ $\text{M}+\text{H}$ ] $^{+}$  calcd. for:  $\text{C}_{19}\text{H}_{13}\text{BrNO}^+$  350.0175, found 350.0169; Mp: 102-103  $^{\circ}\text{C}$ ; The analytical data are in accordance with the literature. [11]

### (3,5-Bis(trifluoromethyl)phenyl)(9H-carbazol-9-yl)methanone (2l)

Prepared according to **GP1** from 3,5-bis(trifluoromethyl)benzamide (51.4 mg, 200  $\mu\text{mol}$ , 1.00 equiv.) and **1a** (171 mg, 400  $\mu\text{mol}$ , 2.00 equiv.). Column chromatography ( $\text{SiO}_2/\text{Cyclohexane}:\text{EtOAc}$  97:3 (V:V)) gave the product as a colourless solid (74.4 mg, 183  $\mu\text{mol}$ , 91%)

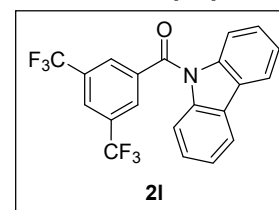

**$^1\text{H NMR}$  (600 MHz,  $\text{CDCl}_3$ ):**  $\delta$  = 8.19 (d,  $J$  = 1.6 Hz, 2H), 8.16 (s, 1H), 8.04 (dd,  $J$  = 7.6, 1.4 Hz, 2H), 7.45 (d,  $J$  = 8.2 Hz, 2H), 7.41 (td,  $J$  = 7.4, 1.1 Hz, 2H), 7.39 – 7.35 (m, 2H) ppm;  **$^{13}\text{C NMR}$  (151 MHz,  $\text{CDCl}_3$ ):**  $\delta$  = 166.3, 138.7, 137.7, 132.8 (q,  $J$  = 34.2 Hz), 129.6 (d,  $J$  = 4.0 Hz), 127.3, 124.5, 122.8 (q,  $J$  = 272.3, 271.6 Hz), 115.7 ppm;  **$^{19}\text{F NMR}$  (565 MHz,  $\text{CDCl}_3$ ):**  $\delta$  = -62.97 ppm; **FTIR (ATR, neat,  $\text{cm}^{-1}$ ):**  $\tilde{\nu}$  = 3052 (w), 2928 (w), 2854 (w), 2219 (w), 1686 (m), 1670 (m), 1616 (w), 1490 (w), 1453 (m), 1444 (m), 1275 (s); **HRMS (APCI):**  $m/z$  [ $\text{M}$ ] $^{+}$ : calcd. for  $\text{C}_{21}\text{H}_{11}\text{F}_6\text{NO}^+$ : 407.0739, found 407.0739; **Mp:** T = 143-145  $^{\circ}\text{C}$ ;

### (9H-Carbazol-9-yl)(3,5-dibromophenyl)methanone (2m)

Prepared according to **GP1** from 3,5-dibromobenzamide (55.8 mg, 200  $\mu\text{mol}$ , 1.00 equiv.) and **1a** (171 mg, 400  $\mu\text{mol}$ , 2.00 equiv.). Column chromatography ( $\text{SiO}_2/\text{Cyclohexane}:\text{EtOAc}$  97:3 (V:V)) gave the product as a colourless solid (75.5 mg, 176  $\mu\text{mol}$ , 88%)

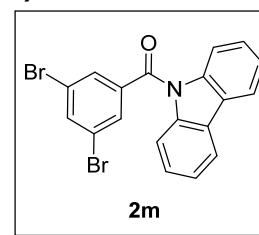

**$^1\text{H NMR}$  (600 MHz,  $\text{CDCl}_3$ ):**  $\delta$  = 8.07 – 8.02 (m, 2H), 7.97 (t,  $J$  = 1.8 Hz, 1H), 7.80 (d,  $J$  = 1.8 Hz, 2H), 7.60 – 7.51 (m, 2H), 7.41 (m, 4H) ppm.;  **$^{13}\text{C NMR}$  (151 MHz,  $\text{CDCl}_3$ ):**  $\delta$  = 166.4, 139.0, 138.8, 137.8, 130.7, 127.2, 126.4, 124.2, 123.7, 120.2, 115.9 ppm; **FTIR (ATR, neat,  $\text{cm}^{-1}$ ):**  $\tilde{\nu}$  = 3068 (w), 2962 (w), 2829 (w), 1665 (s), 1556 (m), 1478 (w), 1453 (m), 1442 (m), 1320 (s), 1291 (s); **HRMS (APCI):**  $m/z$   $[\text{M}]^{++}$ : calcd. for  $\text{C}_{19}\text{H}_{11}\text{Br}_2\text{NO}^{++}$ : 426.9202, found 426.9196; **Mp:** T = 146-148  $^\circ\text{C}$ ;

### (9H-Carbazol-9-yl)(3,5-dimethoxyphenyl)methanone (2n)

Prepared according to **GP1** from 3,5-dimethoxybenzamide (36.2 mg, 200  $\mu\text{mol}$ , 1.00 equiv.) and **1a** (171 mg, 400  $\mu\text{mol}$ , 2.00 equiv.). Column chromatography ( $\text{SiO}_2/\text{Cyclohexane}:\text{EtOAc}$  97:3 (V:V)) gave the product as a colourless solid (36.9 mg, 111  $\mu\text{mol}$ , 56%)

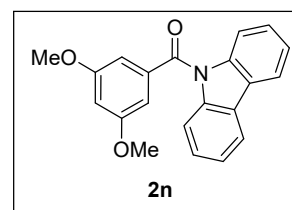

**$^1\text{H NMR}$  (600 MHz,  $\text{CDCl}_3$ ):**  $\delta$  = 8.03 – 7.95 (m, 2H), 7.64 – 7.52 (m, 2H), 7.45 – 7.30 (m, 4H), 6.83 (d,  $J$  = 2.3 Hz, 2H), 6.72 (t,  $J$  = 2.3 Hz, 1H), 3.79 (s, 6H) ppm;  **$^{13}\text{C NMR}$  (151 MHz,  $\text{CDCl}_3$ ):**  $\delta$  = 169.5, 161.3, 139.2, 137.8, 127.0, 126.2, 123.7, 119.9, 116.1, 106.6, 104.9, 55.8 ppm; **FTIR (ATR, neat,  $\text{cm}^{-1}$ ):**  $\tilde{\nu}$  = 3096 (w); 3056 (w), 3008 (w), 2960 (w), 2845 (w), 2229 (w), 1669 (s), 1489 (w), 1443 (s), 1424 (s), 1361 (m); **HRMS (APCI):**  $m/z$   $[\text{M}+\text{H}]^+$  calcd. for  $\text{C}_{21}\text{H}_{18}\text{NO}_3^+$ : 332.1281, found 332.1276; **Mp:** T = 113-114  $^\circ\text{C}$ ;

### (9H-Carbazol-9-yl)(mesityl)methanone (2o)

Prepared according to **GP1** from 2,4,6-trimethylbenzamide (32.6 mg, 200  $\mu\text{mol}$ , 1.00 equiv.) and **1a** (171 mg, 400  $\mu\text{mol}$ , 2.00 equiv.). Column chromatography ( $\text{SiO}_2/\text{Cyclohexane}:\text{EtOAc}$  97:3 (V:V)) gave the product as a colourless solid (57.0 mg, 182  $\mu\text{mol}$ , 91%)

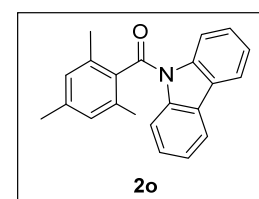

**$^1\text{H NMR}$  (600 MHz,  $\text{CDCl}_3$ ):**  $\delta$  = 8.97 – 8.87 (m, 1H), 8.06 – 7.93 (m, 2H), 7.63 – 7.43 (m, 2H), 7.32 – 7.03 (m, 2H), 7.00 (s, 2H), 6.18 – 6.06 (m, 1H), 2.41 (s, 3H), 2.15 (s, 6H)., aromatic  $^1\text{H}$ -signals were broadened;  **$^{13}\text{C NMR}$  (151 MHz,  $\text{CDCl}_3$ ):**  $\delta$  = 170.4, 140.0, 139.1/138.0 (two signals caused by rotamers), 134.7, 134.5, 129.2, 128.0/127.0 (two signals caused by rotamers), 126.9/126.5 (two signals caused by rotamers), 124.6/123.6 (two signals, caused by rotamers), 120.1/119.5 (two signals, caused by rotamers), 118.2/113.8 (two signals, caused by rotamers), 21.5, 19.1 ppm doublets are caused by rotational barrier of amide; **FTIR (ATR, neat,  $\text{cm}^{-1}$ ):**  $\tilde{\nu}$  = 3066 (w), 2948 (w), 2916 (w), 1693 (s), 1609 (w), 1490 (w), 1476 (w), 1441 (m), 1426 (m), 1328 (s), 1301 (s); **HRMS (APCI):**  $m/z$   $[\text{M}+\text{H}]^+$  calcd. for:  $\text{C}_{22}\text{H}_{20}\text{NO}^+$  314.1539, found 314.1536; **Mp:** T = 205-206  $^\circ\text{C}$

### (9H-Carbazol-9-yl)(3,4,5-trimethoxyphenyl)methanone (2p)

Prepared according to **GP1** from 3,4,5-trimethoxybenzamide (42.2 mg, 200  $\mu\text{mol}$ , 1.00 equiv.) and **1a** (171 mg, 400  $\mu\text{mol}$ , 2.00 equiv.). Column chromatography (SiO<sub>2</sub>/Cyclohexane:EtOAc 97:3 (V:V)) gave the product as a colourless solid (49.6 mg, 137  $\mu\text{mol}$ , 69%)

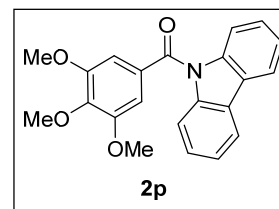

**<sup>1</sup>H NMR (600 MHz, CDCl<sub>3</sub>):**  $\delta$  = 8.11 – 7.96 (m, 2H), 7.65 – 7.51 (m, 2H), 7.47 – 7.32 (m, 4H), 6.98 (s, 2H), 3.97 (s, 3H), 3.80 (s, 6H) ppm; **<sup>13</sup>C NMR (151 MHz, CDCl<sub>3</sub>):**  $\delta$  = 169.3, 153.6, 141.8, 139.3, 130.6, 126.9, 126.1, 123.6, 120.0, 116.0, 106.7, 61.3, 56.5 ppm; **FTIR (ATR, neat, cm<sup>-1</sup>):**  $\tilde{\nu}$  = 3061 (w), 3005 (w), 2935 (w), 2835 (w), 1732 (w), 1670 (s), 1584 (s), 1477 (w), 1443 (s), 1413 (m), 1357 (m), 1325 (s); **HRMS (APCI):**  $m/z$  [M+H]<sup>+</sup> calcd. for C<sub>22</sub>H<sub>20</sub>NO<sub>4</sub><sup>+</sup>: 362.1387, found 362.1383; HRMS (APCI):  $m/z$  [M+Na]<sup>+</sup> calcd. for C<sub>22</sub>H<sub>19</sub>NO<sub>4</sub>Na [M+Na]<sup>+</sup> 384.1206, found 384.1204; **Mp:** T = 122-124 °C;

### Ethyl 9H-carbazole-9-carboxylate (2q)

Prepared according to **GP1** from urethane (17.8 mg, 200  $\mu\text{mol}$ , 1.00 equiv.) and **1a** (171 mg, 400  $\mu\text{mol}$ , 2.00 equiv.). Column chromatography (SiO<sub>2</sub>/Cyclohexane:EtOAc 97:3 (V:V)) gave the product as a colourless solid (35.5 mg, 148  $\mu\text{mol}$ , 74%)

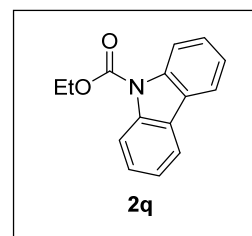

**<sup>1</sup>H NMR (600 MHz, CDCl<sub>3</sub>):**  $\delta$  = 8.33 (d,  $J$  = 8.4 Hz, 2H), 7.99 (ddd,  $J$  = 7.7, 1.4, 0.7 Hz, 2H), 7.49 (ddd,  $J$  = 8.4, 7.3, 1.3 Hz, 2H), 7.38 (td,  $J$  = 7.5, 1.0 Hz, 2H), 4.61 (q,  $J$  = 7.2 Hz, 2H), 1.58 (t,  $J$  = 7.1 Hz, 3H) ppm; **<sup>13</sup>C NMR (151 MHz, CDCl<sub>3</sub>):**  $\delta$  = 152.6, 138.4, 127.3, 126.0, 123.4, 120.0, 116.4, 63.2, 14.6 ppm; **FTIR (ATR, neat, cm<sup>-1</sup>):**  $\tilde{\nu}$  = 3058 (w), 3044 (w), 3012 (w), 2981 (w), 2934 (w), 2903 (w), 2867 (w), 1938 (w), 1903 (w), 1732 (s), 1597 (w), 1476 (w), 1443 (s), 1370 (m); **HRMS (APCI):**  $m/z$  [M]<sup>+</sup> calcd. for: C<sub>15</sub>H<sub>13</sub>NO<sub>2</sub><sup>+</sup> 239.0941, found 239.0939; **Mp:** 70-71 °C; The analytical data is in accordance with the literature [12]

### 1-(9H-Carbazol-9-yl)-2-phenylethan-1-one (2r)

Prepared according to **GP1** from 2-phenylacetamide (27.0 mg, 200  $\mu\text{mol}$ , 1.00 equiv.) and **1a** (171 mg, 400  $\mu\text{mol}$ , 2.00 equiv.). Column chromatography (SiO<sub>2</sub>/Cyclohexane:EtOAc 97:3 (V:V)) gave the product as a colourless solid (46.6 mg, 163  $\mu\text{mol}$ , 82%)

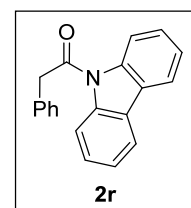

**<sup>1</sup>H NMR (600 MHz, CDCl<sub>3</sub>):**  $\delta$  = 8.26 (d,  $J$  = 8.3 Hz, 2H), 8.05 – 8.00 (m, 2H), 7.48 (ddd,  $J$  = 8.5, 7.2, 1.4 Hz, 2H), 7.41 (td,  $J$  = 7.5, 0.9 Hz, 4H), 7.38 – 7.32 (m, 4H), 4.52 (s, 2H) ppm; **<sup>13</sup>C NMR (151 MHz, CDCl<sub>3</sub>):**  $\delta$  = 171.3, 138.7, 133.7, 129.7, 129.0, 127.6, 127.5, 126.7, 124.0, 120.0, 116.7, 45.5 ppm; **FTIR (ATR, neat, cm<sup>-1</sup>):**  $\tilde{\nu}$  = 3063 (w), 3028 (w), 3006 (w), 2962 (w), 2925 (w), 1694 (s), 1615 (w), 1599 (m), 1586 (w), 1486 (m), 1476 (m), 1443 (s), 1420 (s); **HRMS (APCI):**  $m/z$  [M+H]<sup>+</sup> calcd. for: C<sub>20</sub>H<sub>16</sub>NO<sup>+</sup> 286.1226, found 286.1224; **Mp:** T = 138-140 °C; The analytical data is in accordance with the literature [13]

### 9-(2,4,6-Trimethylbenzoyl)-9H-carbazole-2-carbonitrile (2s)

Prepared according to **GP1** from 2,4,6-trimethylbenzamide (32.6 mg, 200  $\mu\text{mol}$ , 1.00 equiv.) and **1s** (181 mg, 400  $\mu\text{mol}$ , 2.00 equiv.). Column chromatography (SiO<sub>2</sub>/Cyclohexane:EtOAc 97:3 (V:V)) gave the product as a colourless solid (41.0 mg, 121  $\mu\text{mol}$ , 61%).

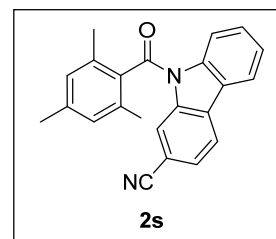

**<sup>1</sup>H NMR (600 MHz, CDCl<sub>3</sub>):**  $\delta$  = 9.63 – 8.69 (m, rotamers, 1H), 8.20 – 7.91 (m, 2H), 7.85 – 7.29 (m, 3H), 7.02 (s, 2H), 6.21 (br, rotamers, 1H), 2.42 (s, 3H), 2.13 (s, 6H) ppm aromatic <sup>1</sup>H-signals were broadened; **<sup>13</sup>C NMR (151 MHz, CDCl<sub>3</sub>):**  $\delta$  = Aromatic carbon were not identifiable due to rotation 21.4, 19.0 ppm; **FTIR (ATR, neat, cm<sup>-1</sup>):**  $\tilde{\nu}$  = 3052 (w), 2225 (m), 1937 (w), 1921 (w), 1786 (w), 1633 (w), 1535 (m), 1452 (s), 1416 (m), 1375 (m); **HRMS (EI):**  $m/z$  [M]<sup>+</sup> calcd. for C<sub>23</sub>H<sub>18</sub>N<sub>2</sub>O<sup>+</sup>: 338.1419, found 338.1418; **Mp:** T = 192-194 °C;

### 6-Bromo-9-(2,4,6-trimethylbenzoyl)-9H-carbazole-2-carbonitrile (2t)

Prepared according to **GP1** from 2,4,6-trimethylbenzamide (32.6 mg, 200  $\mu\text{mol}$ , 1.00 equiv.) and **1t** (213 mg, 400  $\mu\text{mol}$ , 2.00 equiv.). Column chromatography (SiO<sub>2</sub>/Cyclohexane:EtOAc 97:3 (V:V)) gave the product as a colourless solid (39.2 mg, 93.9  $\mu\text{mol}$ , 47%).

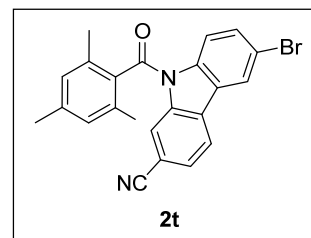

**<sup>1</sup>H NMR (600 MHz, CDCl<sub>3</sub>):**  $\delta$  9.06 (br, rotamers, 1H), 8.37 – 7.97 (m, 2H), 7.68 (br. rotamers, 1H), 7.42 – 7.17 (m, 1H), 7.05 (s, 2H), 6.14 (br, rotamers 1H), 2.44 (s, 3H), 2.14 (s, 6H) ppm aromatic <sup>1</sup>H-signals were broadened; **<sup>13</sup>C NMR (151 MHz, Chloroform-d)**  $\delta$  = 170.1, 140.9, 138.5, 137.7, 134.5, 133.4, 132.6, 131.9, 129.5, 128.1, 127.1, 123.8, 123.4, 122.3, 121.0, 120.5, 119.7, 119.2, 118.1, 117.6, 115.5, 111.5, 21.5, 19.0 ppm (aromatic signals were separated by rotational barriers); **FTIR (ATR, neat, cm<sup>-1</sup>):**  $\tilde{\nu}$  = 2918 (w), 2853 (w), 2218 (m), 1682 (s), 1610 (m), 1577 (w), 1482 (s), 1454 (m), 1426 (s), 1413 (s); **HRMS (EI):**  $m/z$  [M]<sup>+</sup> calcd. for C<sub>22</sub>H<sub>17</sub>N<sub>2</sub>BrO<sup>+</sup>: 416.0524, found 416.0513; **Mp:** T = 227-230 °C;

### Acridin-10(9H)-yl(mesityl)methanone (3a)

Prepared according to **GP1** from 2,4,6-trimethylbenzamide (32.6 mg, 200  $\mu\text{mol}$ , 1.00 equiv.) and 10H-dibenzo[*b,e*]iodinin-5-ium trifluoromethanesulfonate (176 mg, 400  $\mu\text{mol}$ , 2.00 equiv.). Column chromatography (SiO<sub>2</sub>/Cyclohexane:EtOAc 97:3 (V:V)) gave the product as a colorless solid (31.0 mg, 94.7  $\mu\text{mol}$ , 47%).

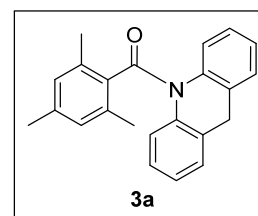

**<sup>1</sup>H NMR (600 MHz, CDCl<sub>3</sub>):**  $\delta$  = 7.9 (s, 1H), 7.4 – 7.3 (m, 1H), 7.1 (d, J = 114.1 Hz, 4H), 6.7 (d, J = 110.2 Hz, 4H), 3.9 (s, 2H), 2.2 (s, 9H) ppm; **<sup>13</sup>C NMR (151 MHz, CDCl<sub>3</sub>):**  $\delta$  = 169.4, 138.3, 134.0, 133.8, 133.5, 132.6, 130.2, 129.8, 129.6, 128.2, 127.2, 126.2, 125.6, 123.8, 34.0, 26.9, 20.2 ppm; **FTIR (ATR, neat, cm<sup>-1</sup>):**  $\tilde{\nu}$  = 2948 (w), 2917 (w), 2862 (w), 2818 (w), 1655 (s), 1610 (m), 1473 (s), 1327 (s), 1269 (s), 1074 (m); **HRMS**

**(APCI):**  $m/z$   $[M+H]^+$  calcd. for  $C_{23}H_{21}NO^+$ : 328.1696, found 328.1693; **Mp:** T = 149-152 °C

### Mesityl(10*H*-phenoxazin-10-yl)methanone (**3b**)

Prepared according to **GP1** with varied temperature at 135 °C from 2,4,6-trimethylbenzamide (16.3 mg, 100  $\mu$ mol, 1.00 equiv.) and Dibenzo[*b,e*][1,4]iodaoxin-5-ium trifluoromethanesulfonate (88.8 mg, 200  $\mu$ mol, 2.00 equiv.). Column chromatography ( $SiO_2/PE:EtOAc$  20:1 (V:V)) gave the product as a colourless solid (27.6 mg, 83.8  $\mu$ mol, 84%)

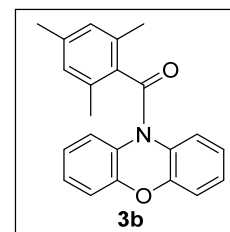

This substrate required low-temperature NMR measurement to yield any meaningful data.

**$^1H$  NMR (600 MHz,  $CDOD_3$ ):**  $\delta$  = 7.89 (dd,  $J$  = 8.0, 1.6 Hz, 1H), 7.32 (td,  $J$  = 7.8, 1.6 Hz, 1H), 7.27 – 7.22 (m, 2H), 7.15 – 7.10 (m, 2H), 6.84 (q,  $J$  = 0.7 Hz, 2H), 6.72 (ddd,  $J$  = 8.5, 6.7, 2.2 Hz, 1H), 6.50 – 6.47 (m, 1H), 2.26 (s, 3H), 2.20 (s, 6H) ppm;  **$^{13}C$  NMR (151 MHz,  $CDOD_3$ ):**  $\delta$  = 170.7, 150.8, 150.8, 139.2, 134.2, 132.6, 128.4, 127.9, 127.8, 127.2, 127.0, 125.8, 123.6, 123.1, 122.9, 116.4, 116.3, 19.8, 17.8 ppm; **FTIR (ATR, neat,  $cm^{-1}$ ):**  $\tilde{\nu}$  = 2918, 1660, 1587, 1480, 1322, 1266, 1072, 860, 761, 748; **HRMS (ESI):**  $m/z$   $[M+H]$  calcd. for:  $C_{22}H_{20}NO_2^+$ : 330.1489, found 330.1488; **Mp:** T = 141-143 °C

This compound was published synthesized with the identical procedure in earlier work and is given as a reference point towards other compounds **3**. [14]

### Mesityl(2-methyl-10*H*-phenoxazin-10-yl)methanone (**3c**)

Prepared according to **GP1** with varied temperature at 135 °C from 2,4,6-trimethylbenzamide (32.6 mg, 200  $\mu$ mol, 1.00 equiv.) and 3-methyldibenzo[*b,e*][1,4]iodaoxin-5-ium trifluoromethanesulfonate (183 mg, 400  $\mu$ mol, 2.00 equiv.). Column chromatography ( $SiO_2/PE:EtOAc$  20:1 (V:V)) gave the product as a colourless solid (50.1 mg, 146  $\mu$ mol, 73%)

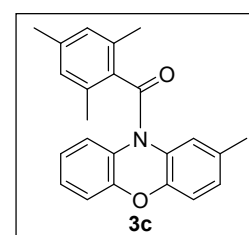

NMR spectroscopy gave no meaningful data at room temperature due strong broadening of signals. Measuring at lower temperature gave no meaningful signals due to diminished solubility;  **$^1H$  NMR (600 MHz,  $CDCl_3$ )**  $\delta$ : 8.03 – 7.66 (m, 1H), 7.24 – 5.73 (m, 9H), 2.25 (s, 3H), 2.22 (s, 6H), 2.44 – 1.76 (m, 3H) ppm;  **$^{13}C$  NMR (151 MHz, Chloroform-*d*):**  $\delta$  = 169.9, 151.1, 148.7, 138.8, 134.6, 133.2, 128.2, 127.6, 127.1 – 125.8 (rotamers), 124.4, 123.8, 123.2, 122.8, 116.7, 116.3, 29.8, 21.2, 19.2 ppm; **FTIR (ATR, neat,  $cm^{-1}$ ):**  $\tilde{\nu}$  = 2918, 1664, 1611, 1480, 1322, 1264, 1069, 856, 755; **HRMS (ESI):**  $m/z$   $[M+Na]^+$ : calcd. for  $C_{23}H_{21}NNaO_2^+$ : 366.1463, found 366.1465; **Mp:** T = 175-177 °C

### (2-Bromo-10*H*-phenoxazin-10-yl)(mesityl)methanone (3d)

Prepared according to **GP1** with varied temperature at 135 °C from 2,4,6-trimethylbenzamide (32.6 mg, 200 μmol, 1.00 equiv.) and 3-bromodibenzo[*b,e*][1,4]iodaoxin-5-ium trifluoromethanesulfonate (209 mg, 400 μmol, 2.00 equiv.). Column chromatography (SiO<sub>2</sub>/PE:EtOAc 20:1 (V:V)) gave the product as a colourless solid (20.1 mg, 49.2 μmol, 25%)

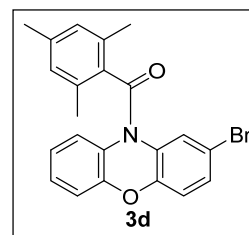

NMR spectroscopy gave no meaningful data at room temperature due strong broadening of signals. Measuring at lower temperature gave no meaningful signals due to diminished solubility; **<sup>1</sup>H NMR (600 MHz, CDCl<sub>3</sub>):** δ = 8.20 – 7.81 (m, 1H), 7.17 – 6.26 (m, 8H), 2.26 (s, 3H), 2.21 (s, 9H) ppm; **<sup>13</sup>C NMR (151 MHz, CDCl<sub>3</sub>):** δ = 21.3, 19.2 ppm Aromatic signals gave no useful data due to broadening; **FTIR (ATR, neat, cm<sup>-1</sup>):**  $\tilde{\nu}$  = 2916, 1669, 1610, 1475, 1317, 1201, 1065, 850, 820, 754; **HRMS (ESI):** *m/z* [M+H]<sup>+</sup> calcd. for C<sub>22</sub>H<sub>19</sub>BrNO<sub>2</sub><sup>+</sup>: 408.0594, found 408.0592; **Mp:** T = 177-179 °C;

### 10-(2,4,6-Trimethylbenzoyl)-10*H*-phenoxazine-2-carbonitrile (3e)

Prepared according to **GP1** with varied temperature at 135 °C from 2,4,6-trimethylbenzamide (32.6 mg, 200 μmol, 1.00 equiv.) and 3-cyanodibenzo[*b,e*][1,4]iodaoxin-5-ium trifluoromethanesulfonate (209 mg, 400 μmol, 2.00 equiv.). Column chromatography (SiO<sub>2</sub>/PE:EtOAc 20:1 (V:V)) gave the product as a colourless solid (18.3 mg, 51.6 μmol, 26%)

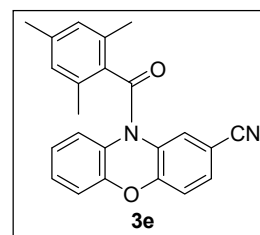

NMR spectroscopy gave no meaningful data at room temperature due strong broadening of signals. Measuring at lower temperature gave no meaningful signals due to diminished solubility; **<sup>1</sup>H NMR (600 MHz, CDCl<sub>3</sub>):** δ = 8.58 – 7.66 (m, 1H), 7.21 – 6.20 (m, 8H), 2.27 (s, 3H), 2.20 (s, 6H) ppm; **<sup>13</sup>C NMR (151 MHz, CDCl<sub>3</sub>):** δ = 169.7, 154.1, 149.6, 134.5, 128.4, 117.7, 116.8, 21.2, 19.1 ppm, Phenoxazine signals were broadened and split due to rotamers; **IR (ATR, neat, cm<sup>-1</sup>):**  $\tilde{\nu}$  = 2920, 2228, 1673, 1611, 1479, 1296, 1265, 1065, 852, 751; **HR-MS (ESI):** *m/z* [M+Na] calcd. For: C<sub>23</sub>H<sub>18</sub>N<sub>2</sub>NaO<sub>2</sub><sup>+</sup>: 377.1261, found 377.1261; **Mp:** T = 58-59 °C

### (6*H*-imidazo[4,5,1-*de*]2henazine-6-yl)(phenyl)methanone (3f)

Prepared according to **GP1** from Benzamide (24.2 mg, 200 μmol, 1.00 equiv.) and 2,10*b*-diazaceanthrylen-6-ium trifluoromethanesulfonate (187 mg, 400 μmol, 2.00 equiv.). Column chromatography (SiO<sub>2</sub>/Cyclohexane:EtOAc 97:3 (V:V)) gave the product as a yellow solid (4.8 mg, 15.4 μmol, 8%) Single crystals were obtained *via* slow evaporation of a solution in EtOAc

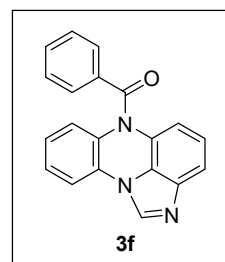

**<sup>1</sup>H NMR (600 MHz, CDCl<sub>3</sub>):** δ = 8.47 (s, 1H), 7.73 (d, *J* = 7.8 Hz, 1H), 7.61 (d, *J* = 7.3 Hz, 2H), 7.48 (d, *J* = 8.2 Hz, 1H), 7.47 – 7.40 (m, 2H), 7.33 (t, *J* = 7.6 Hz, 2H), 7.21 (t, *J* = 7.9 Hz, 1H), 7.13 (t, *J* = 7.2 Hz, 1H), 6.90 – 6.81 (m, 2H) ppm; **<sup>13</sup>C NMR (151 MHz, CDCl<sub>3</sub>):** δ = 169.9, 169.4, 135.0, 133.4, 132.1, 131.8, 130.4, 129.6, 128.8, 128.6, 127.5, 126.4, 126.3, 125.6, 125.2, 116.2, 115.0,

112.8 ppm; **FTIR (ATR, neat,  $\text{cm}^{-1}$ ):**  $\tilde{\nu}$  = 2918 (w), 2853 (w), 2218 (m), 1682 (s), 1610 (m), 1577 (w), 1482 (s), 1454 (m), 1426 (s), 1413 (s); HR-MS (ESI):  $m/z$   $[\text{M}+\text{H}]^+$  calcd. for  $\text{C}_{20}\text{H}_{14}\text{N}_3\text{O}^+$ : 312.1131, found 312.1130; **Mp:** T = 227-230 °C;



# NMR-Spectra

## 2-Bromo-7-cyanodibenzo[*b,d*]iodol-5-ium trifluoromethanesulfonate (1t)

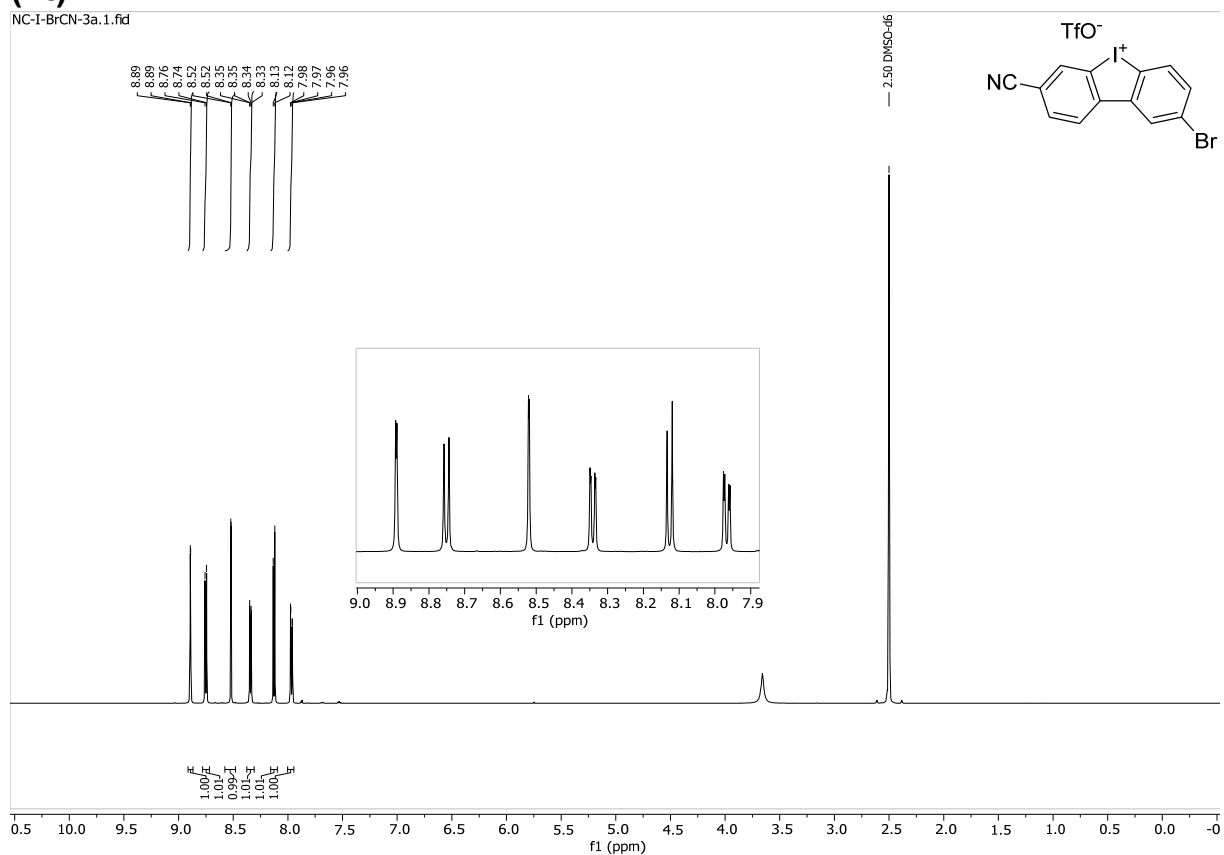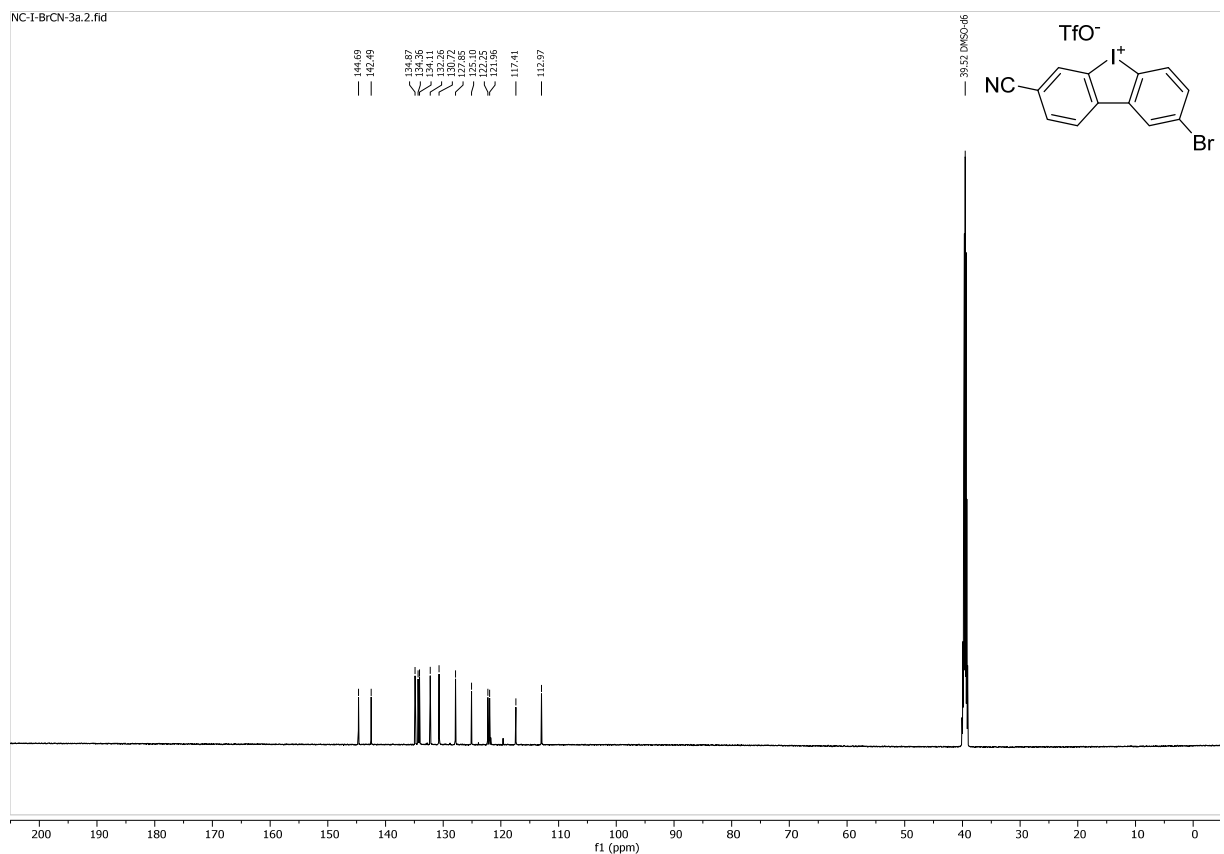

# (4-Bromophenyl)(9H-carbazol-9-yl)methanone (2e)

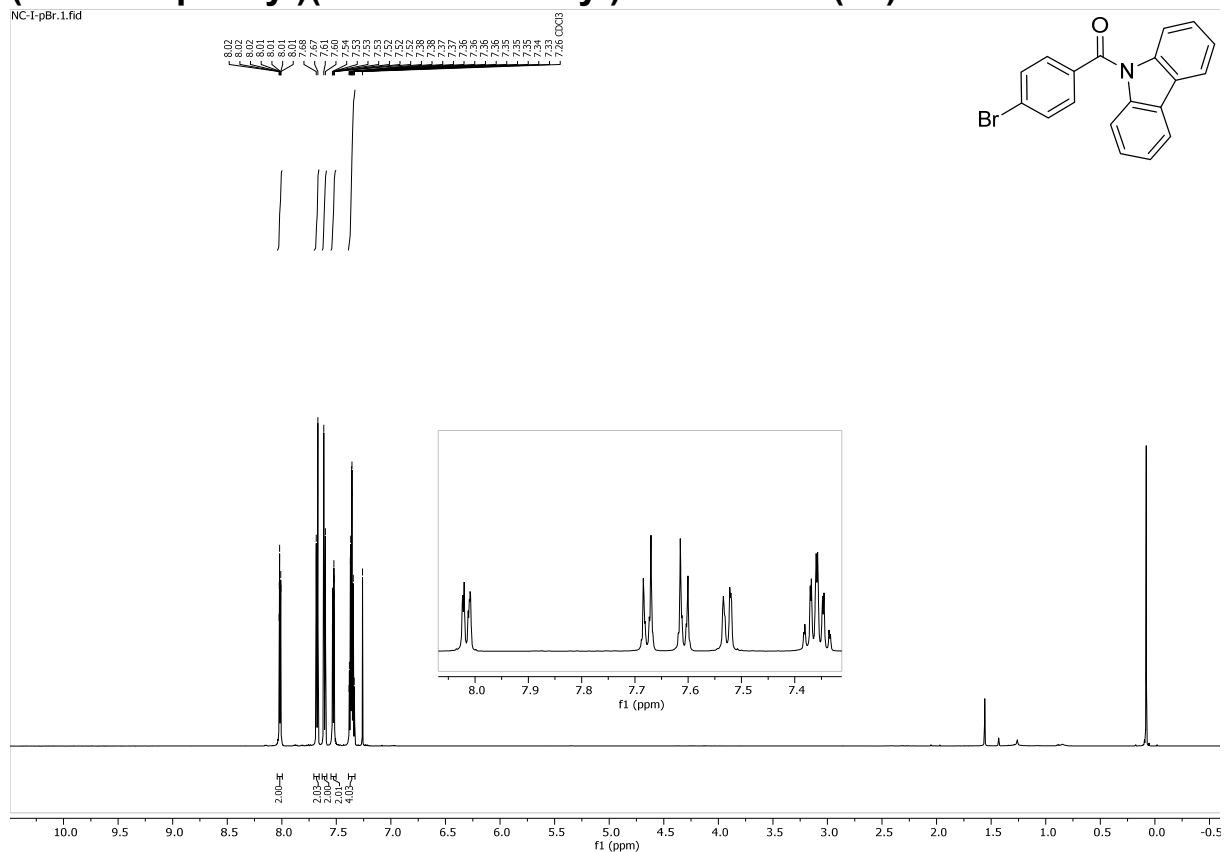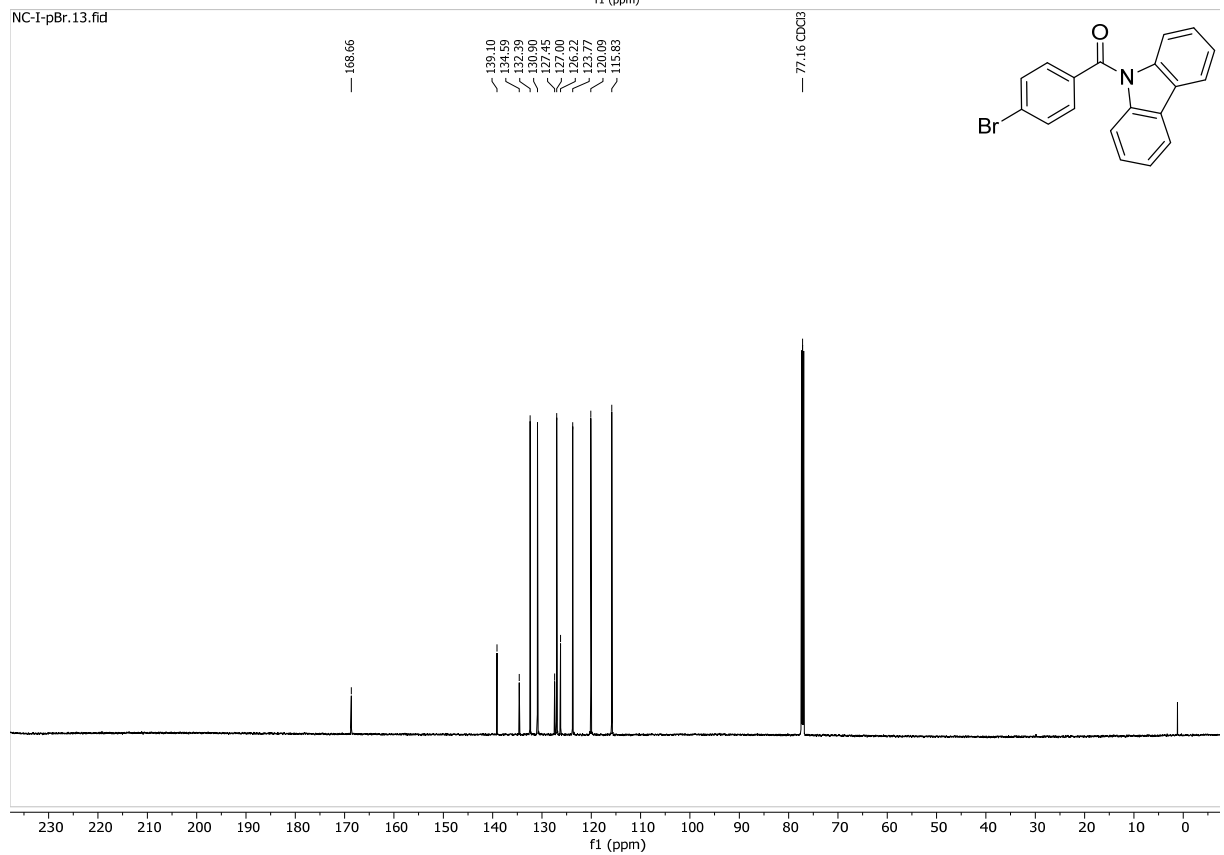

# (9H-Carbazol-9-yl)(4-nitrophenyl)methanone(2g)

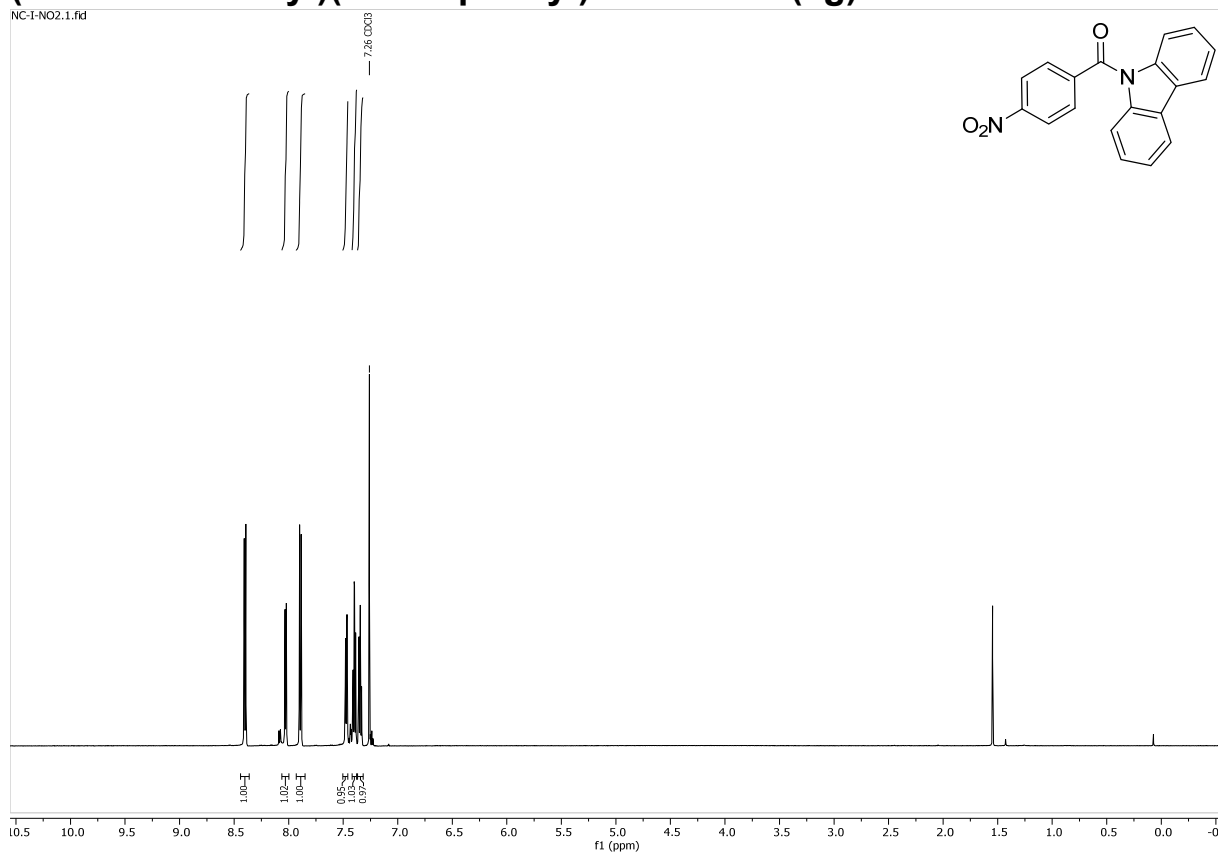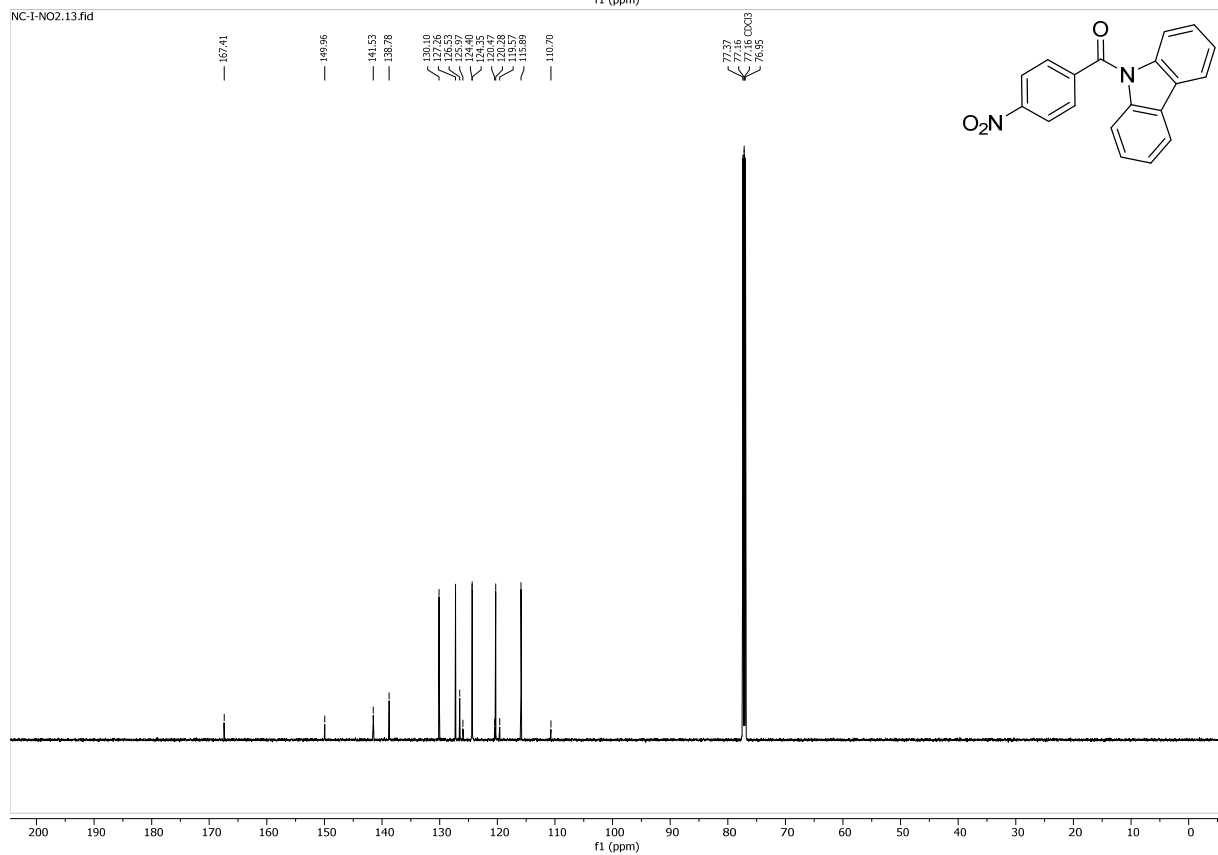





# (2-Bromophenyl)(9H-carbazol-9-yl)methanone (2k)

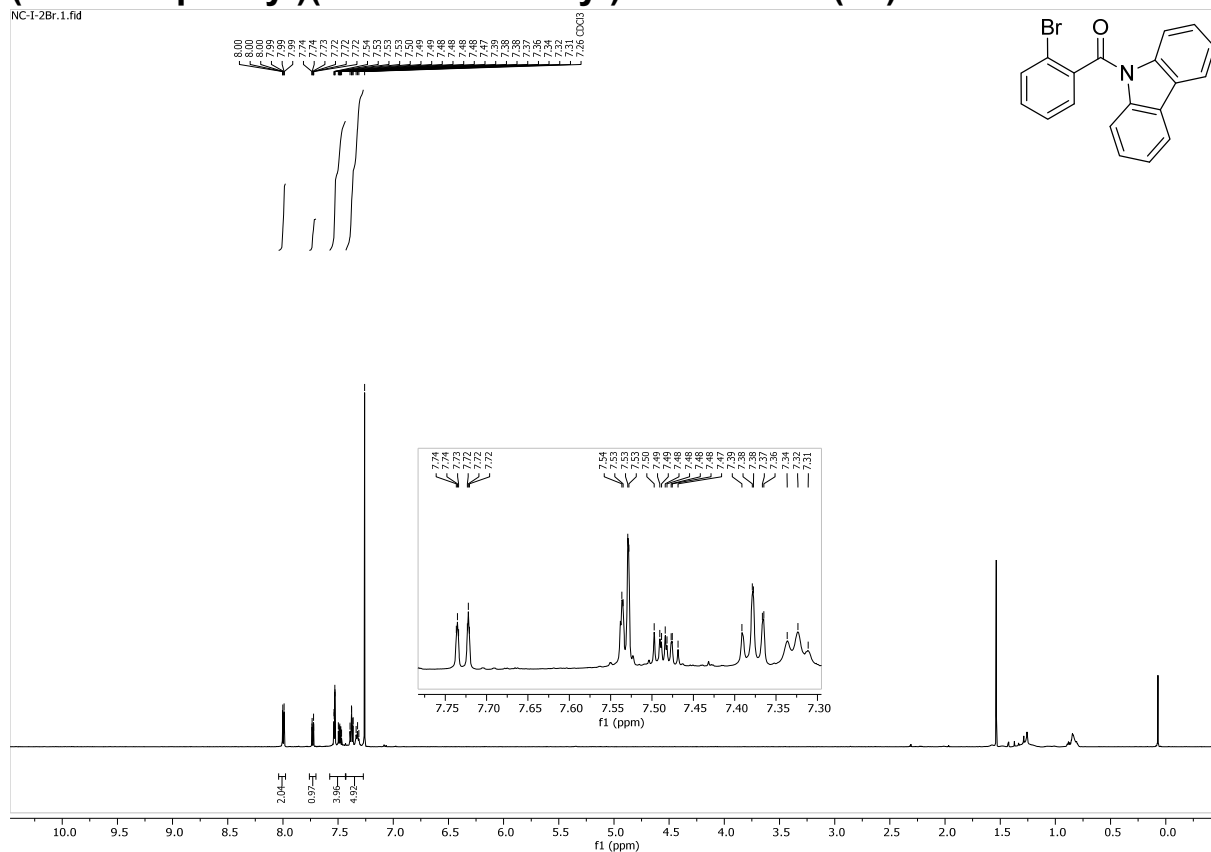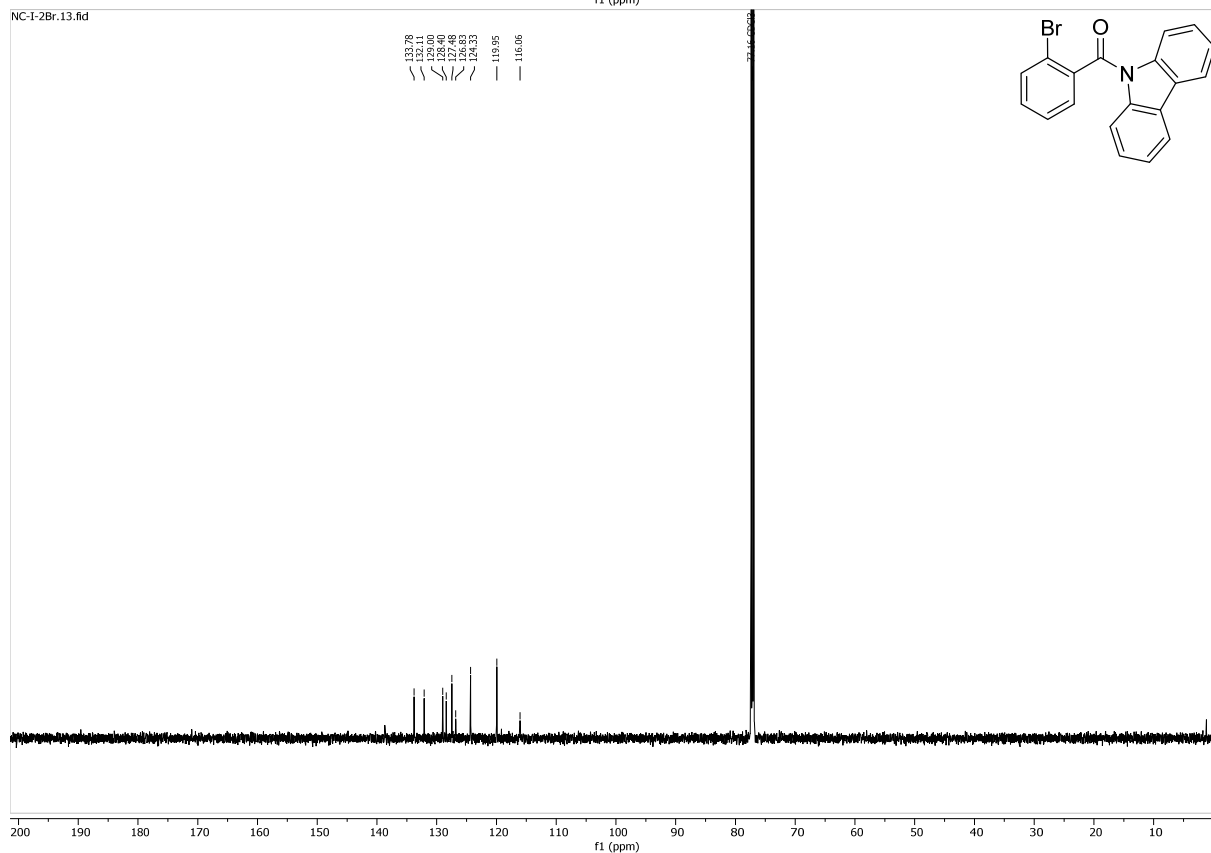



NC-I-F3C2.19.fid

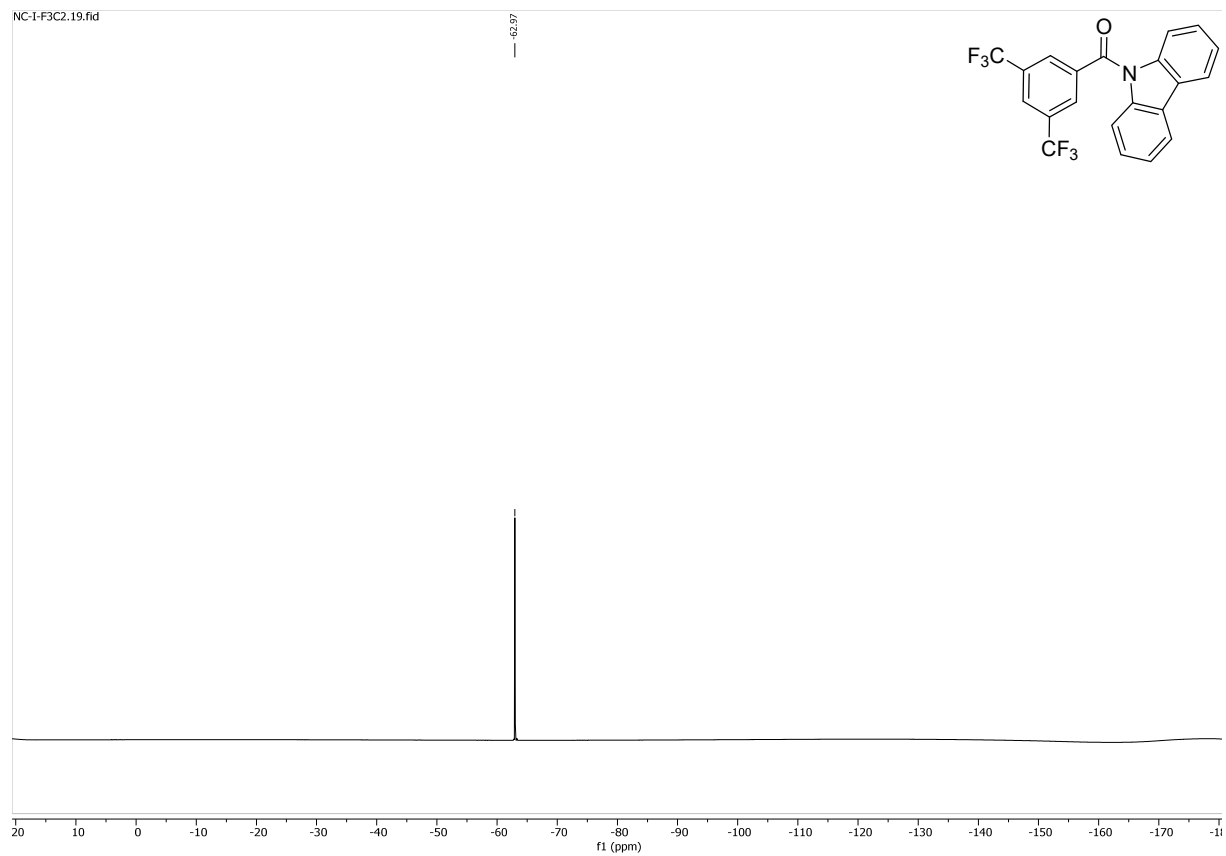



# (9H-Carbazol-9-yl)(3,5-dibromophenyl)methanone (2m)

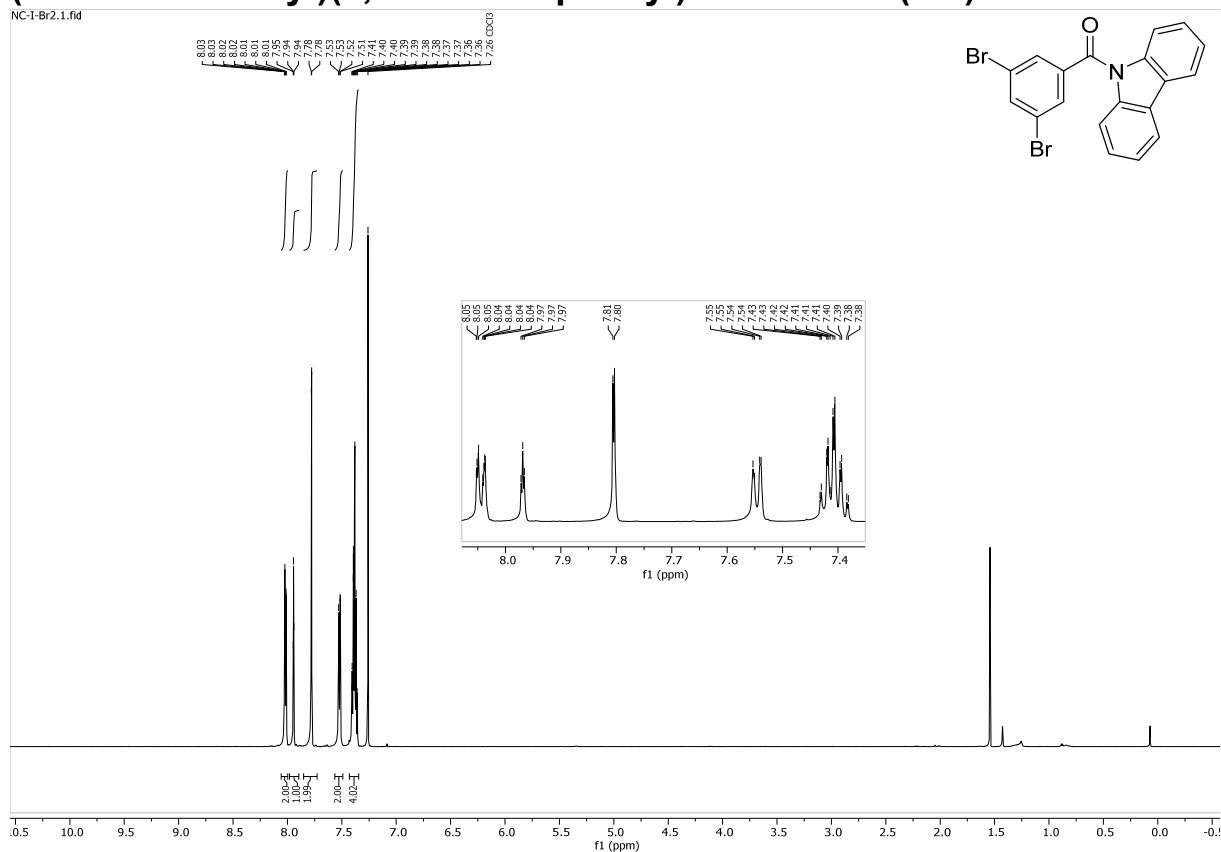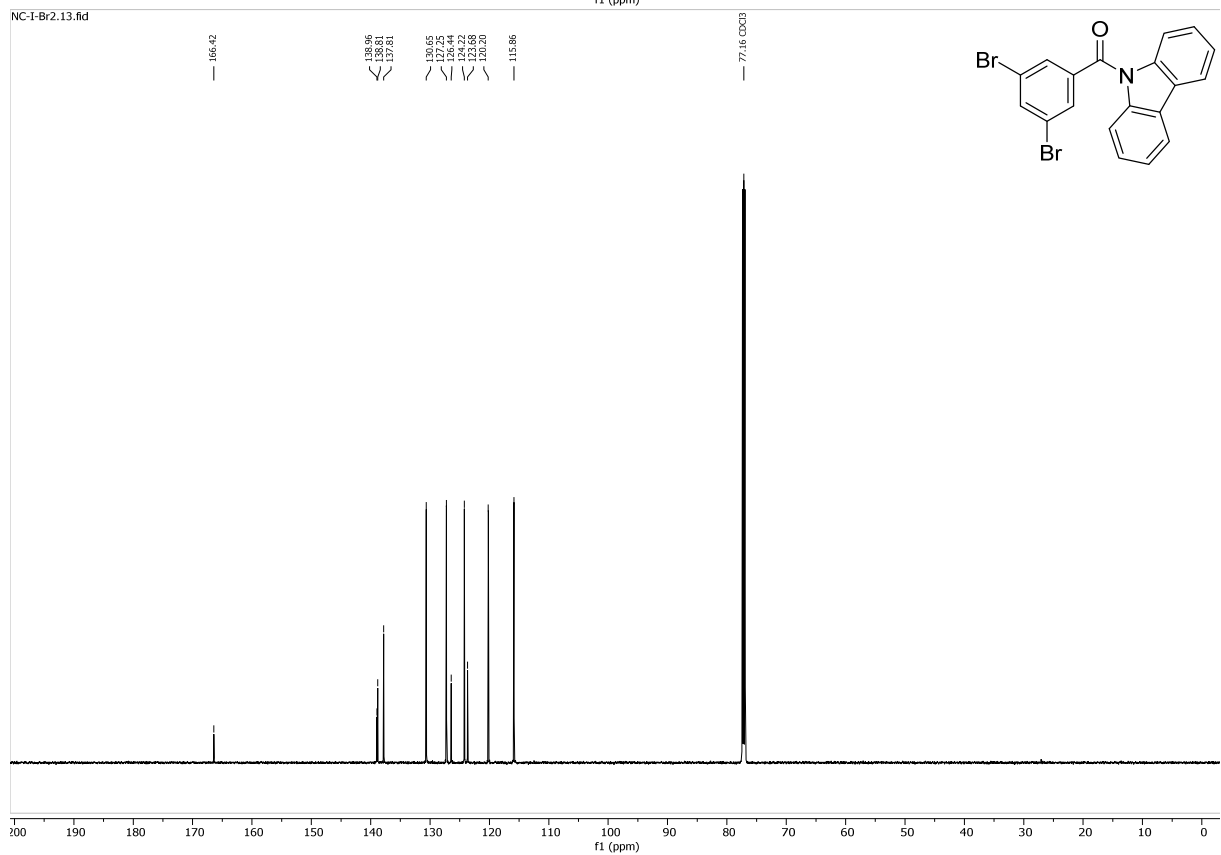

# (9H-Carbazol-9-yl)(3,5-dimethoxyphenyl)methanone(2n)

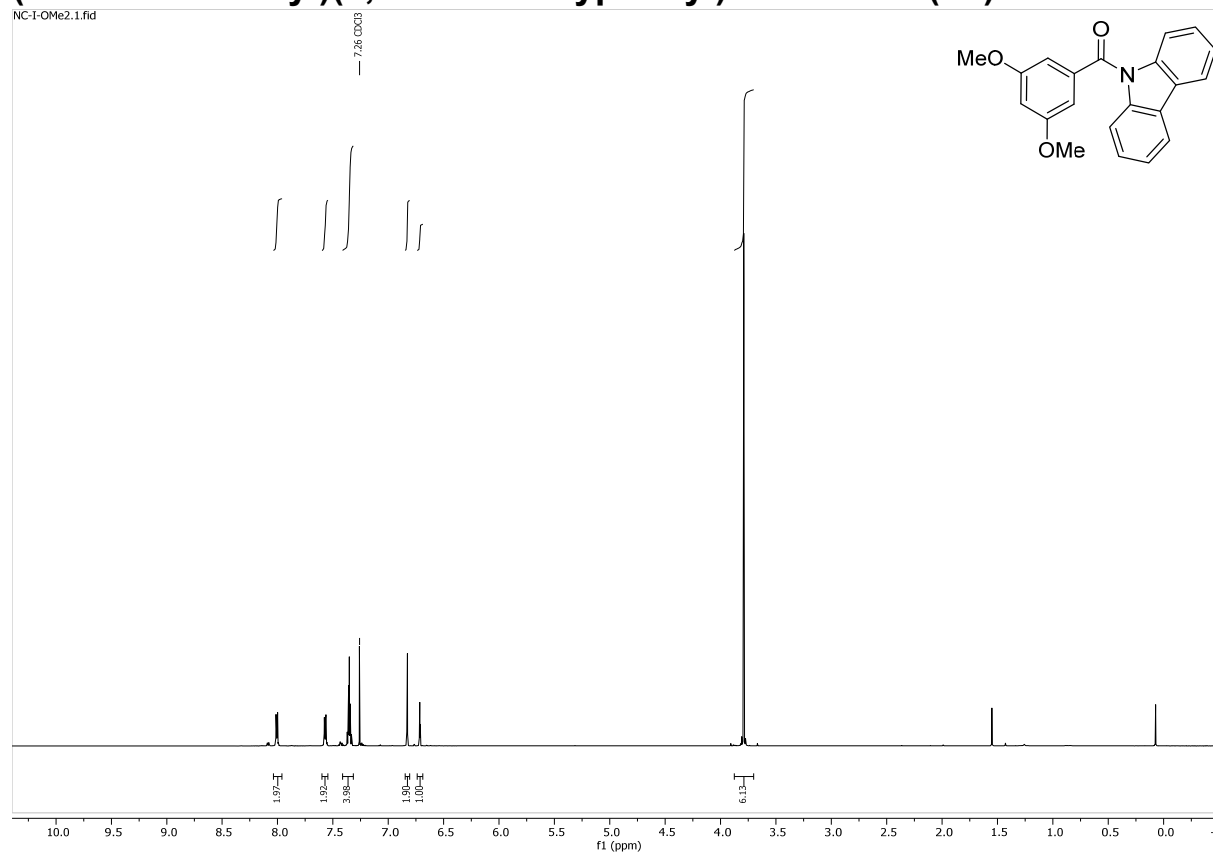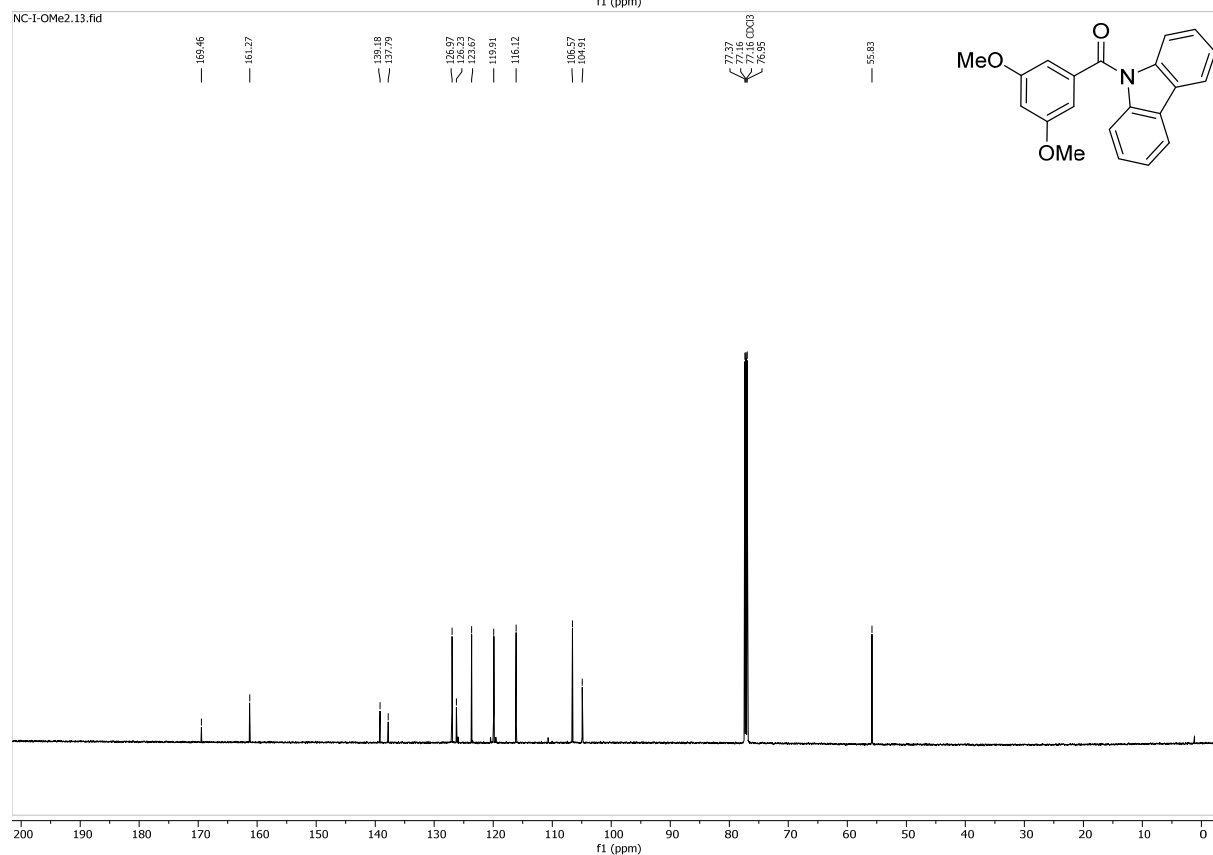



# (9H-Carbazol-9-yl)(3,4,5-trimethoxyphenyl)methanone (2p)

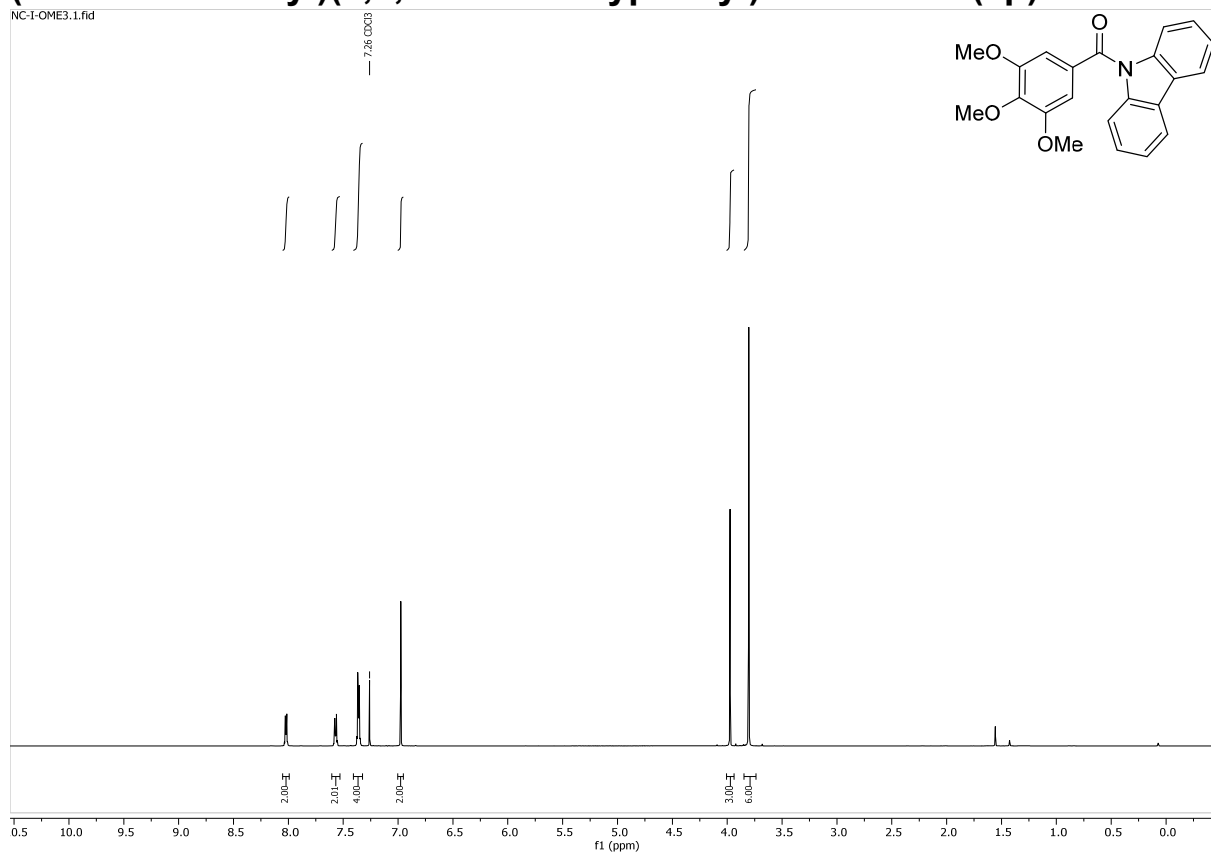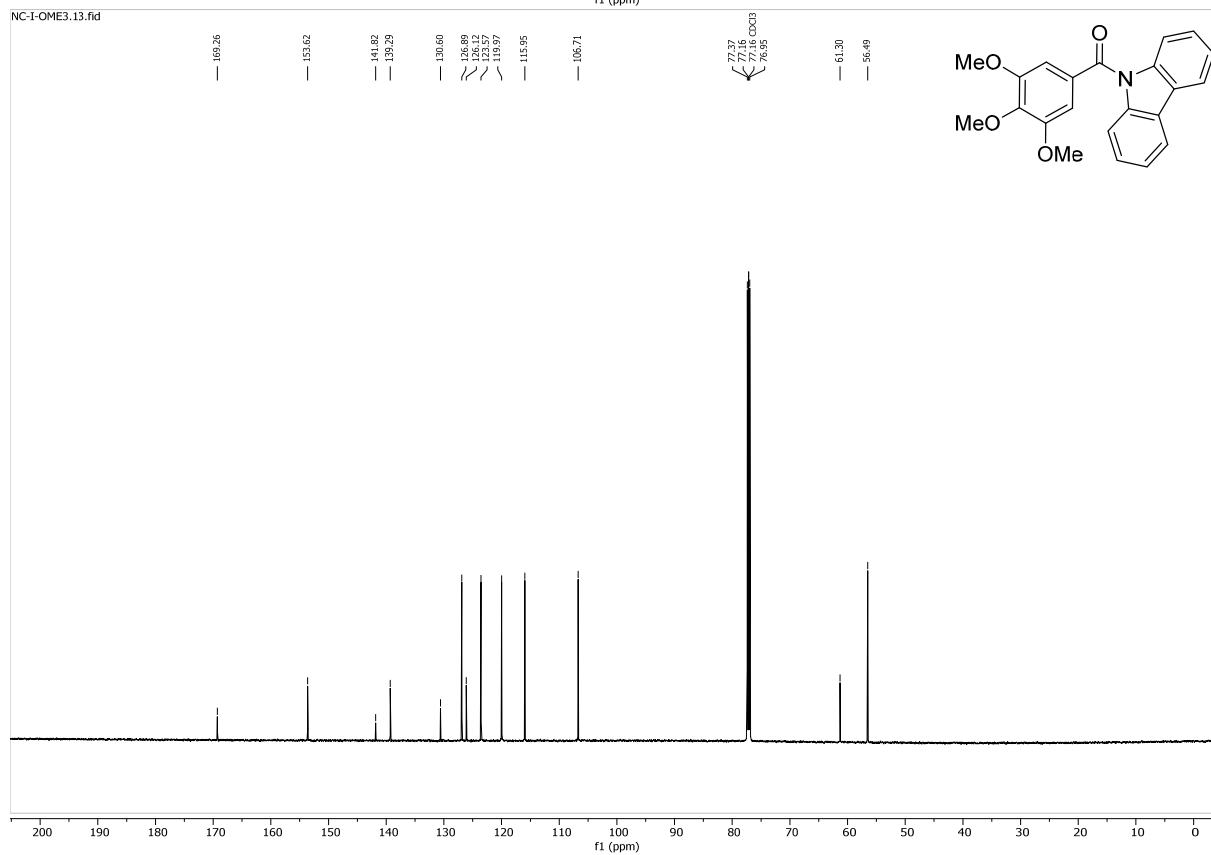



## 9-(2,4,6-Trimethylbenzoyl)-9H-carbazole-2-carbonitrile (2s)

The NMR spectrum of this substrate is broadened by rotational barriers

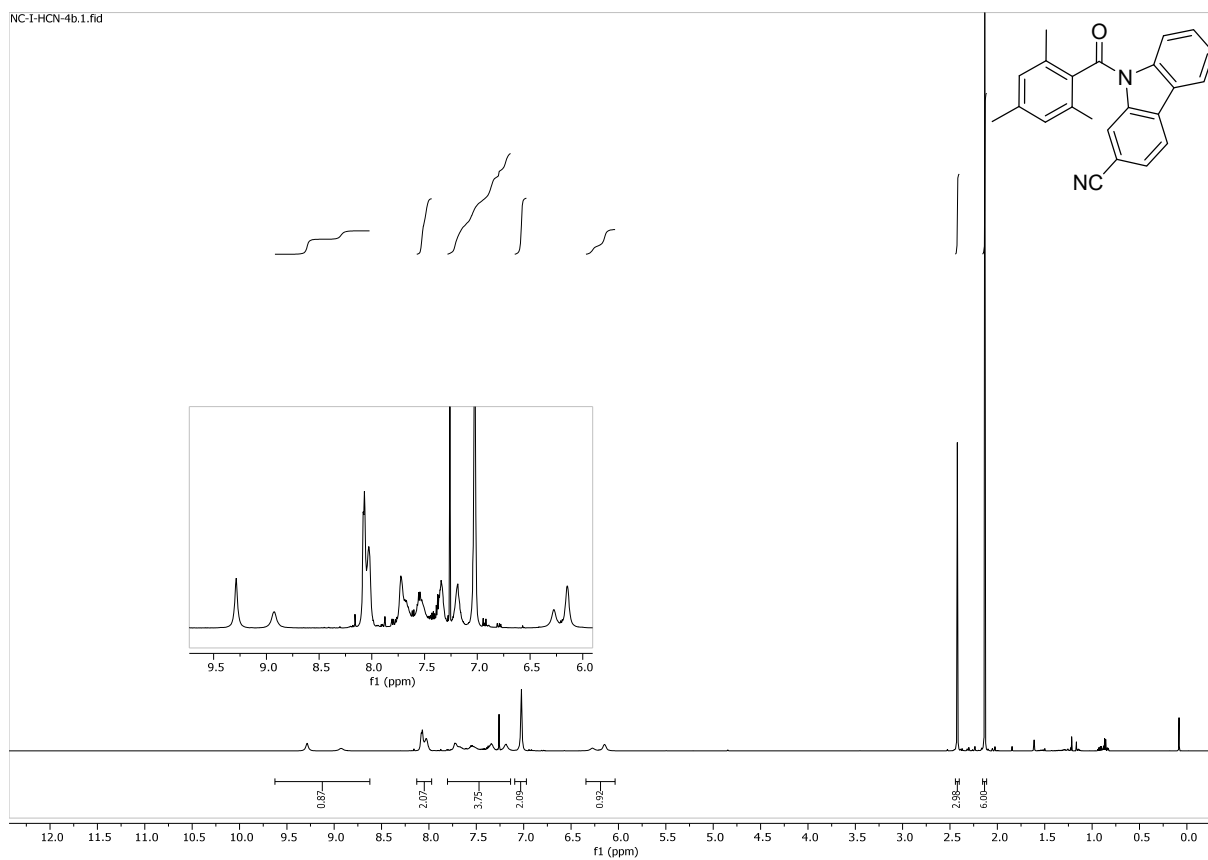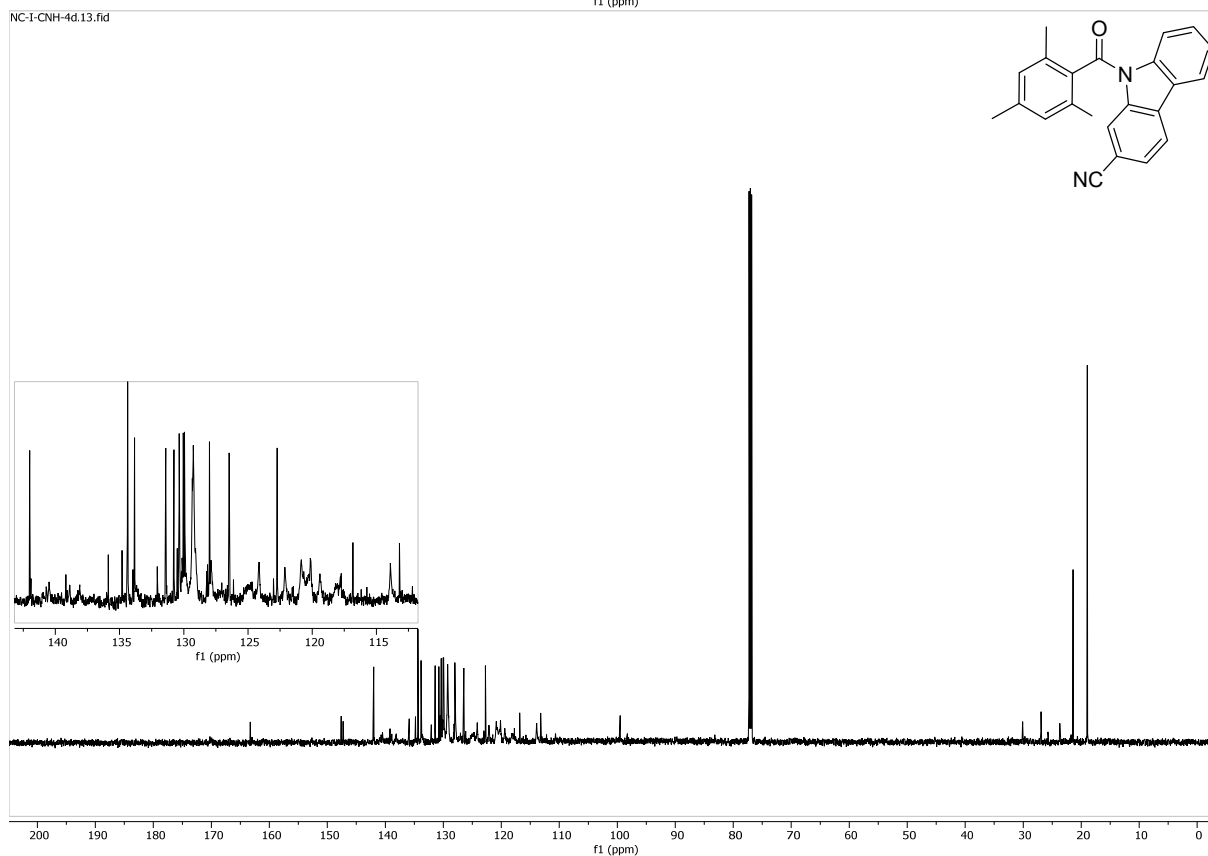

# 6-Bromo-9-(2,4,6-trimethylbenzoyl)-9H-carbazole-2-carbonitrile (2t)

The NMR spectrum of this substrate is broadened by rotational barriers

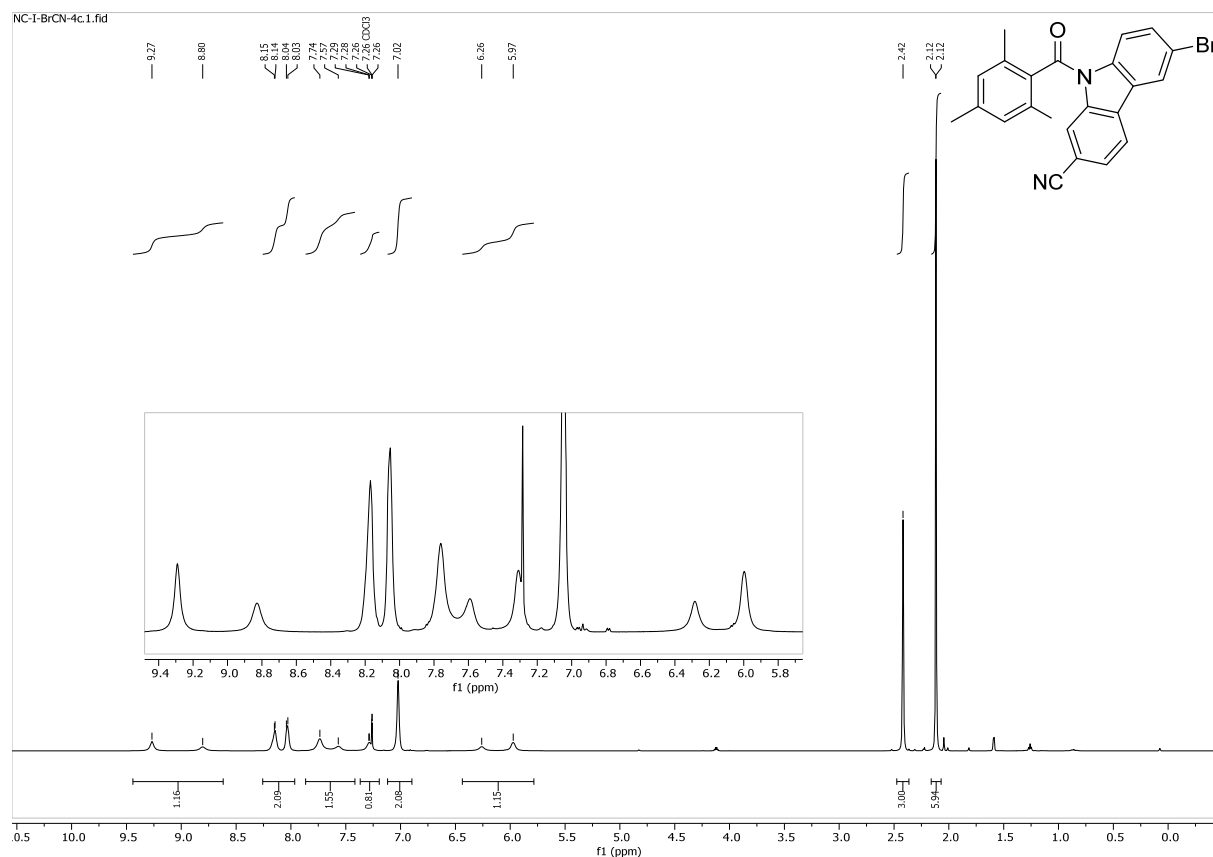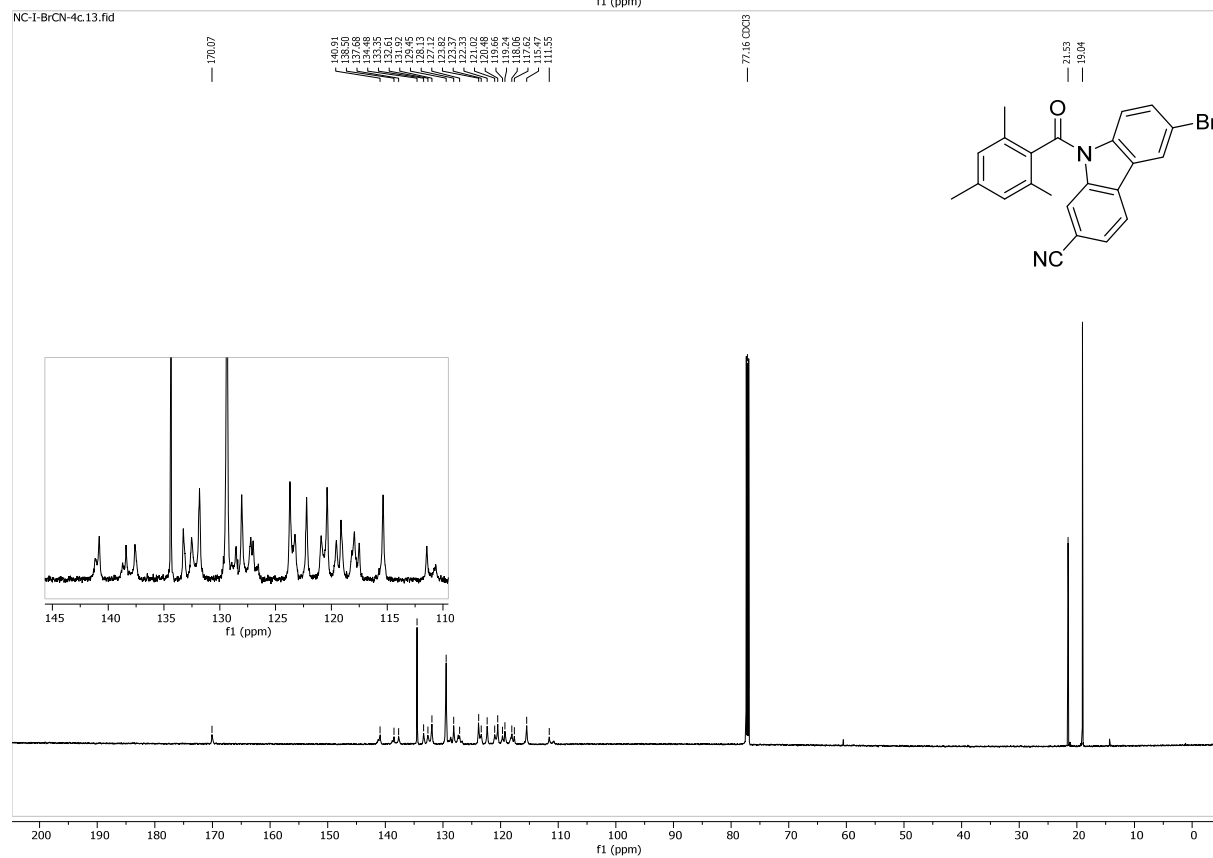

# Acridin-10(9H)-yl(mesityl)methanone (3a)

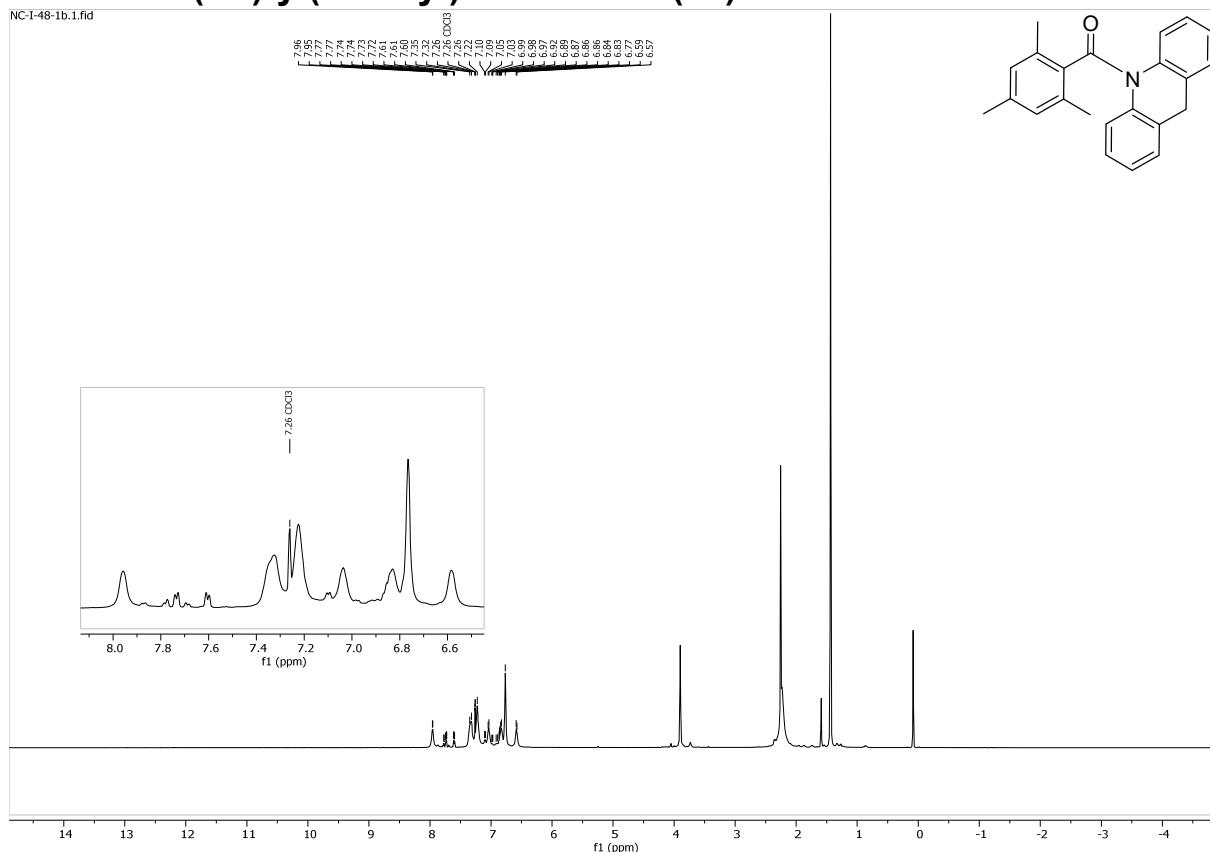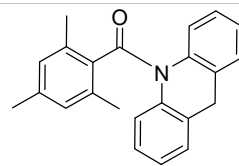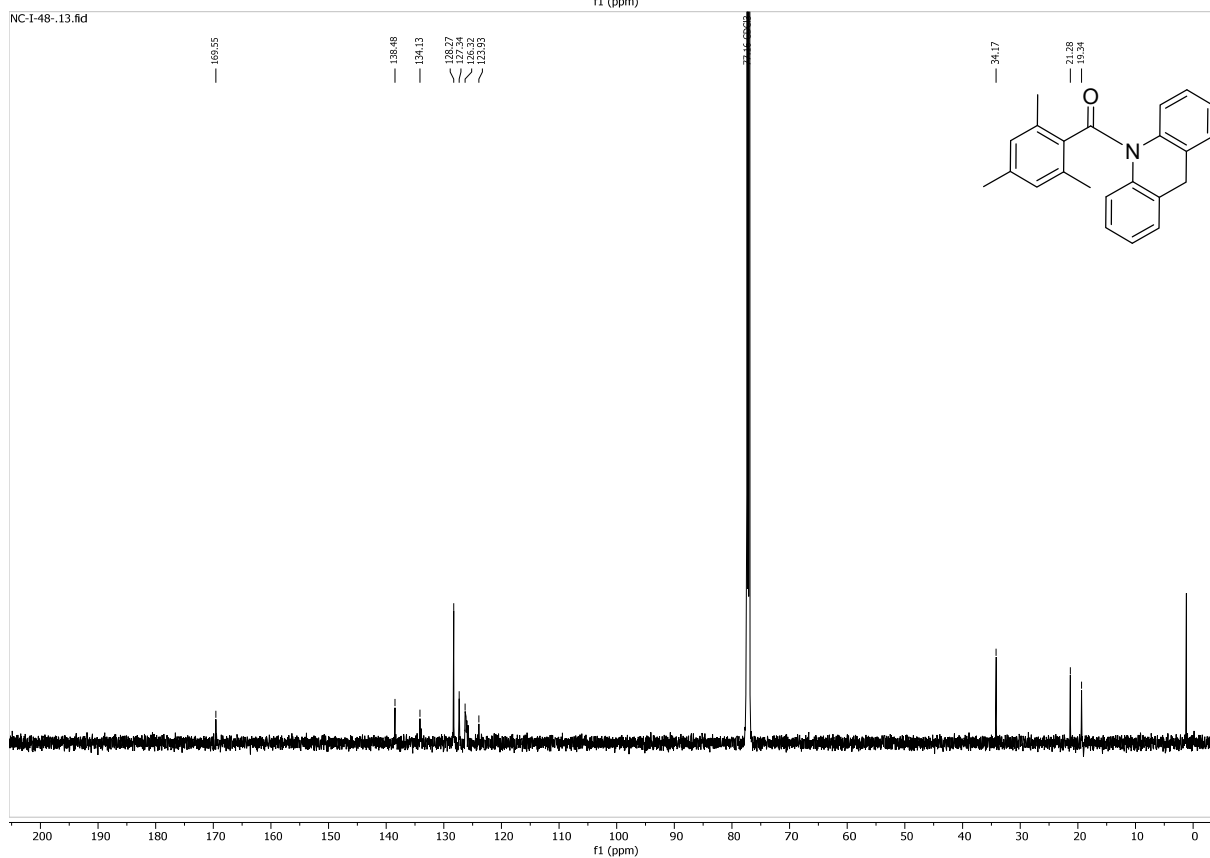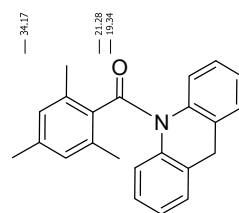



# Mesityl(10H-phenoxazin-10-yl)methanone (3b) [14]

This substrate-class requires low-temperature measurements to give meaningful data

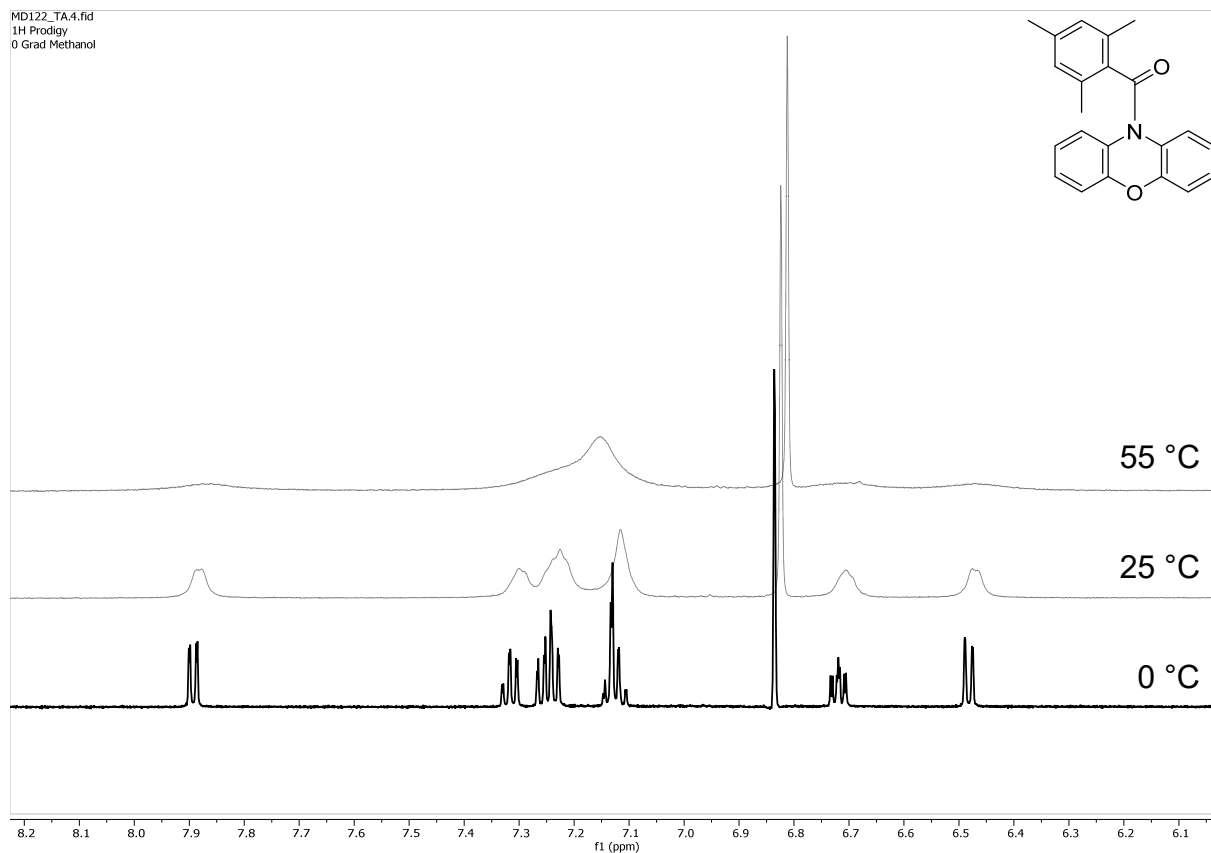

0 °C

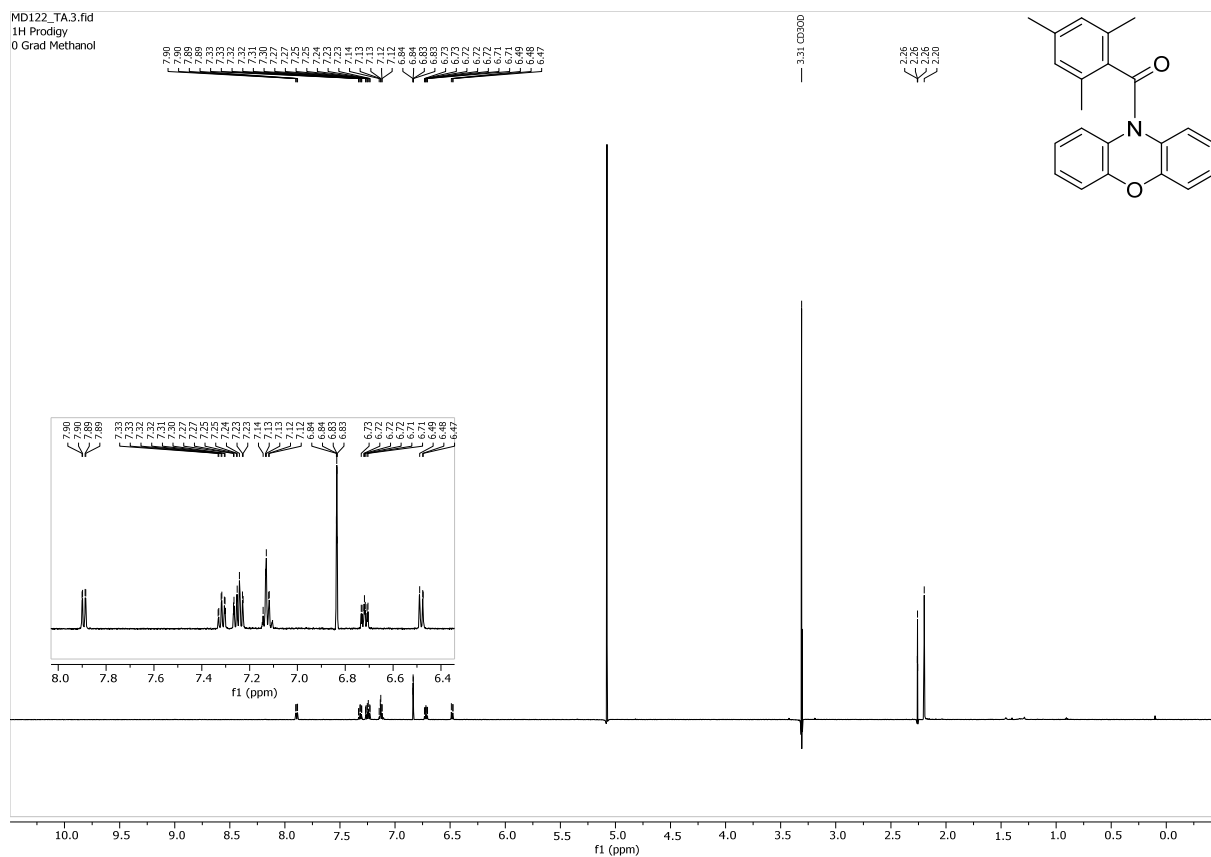





# 10-(2,4,6-Trimethylbenzoyl)-10H-phenoxazine-2-carbonitrile (3e)

Solubility of this compound made low-temperature NMR inefficient

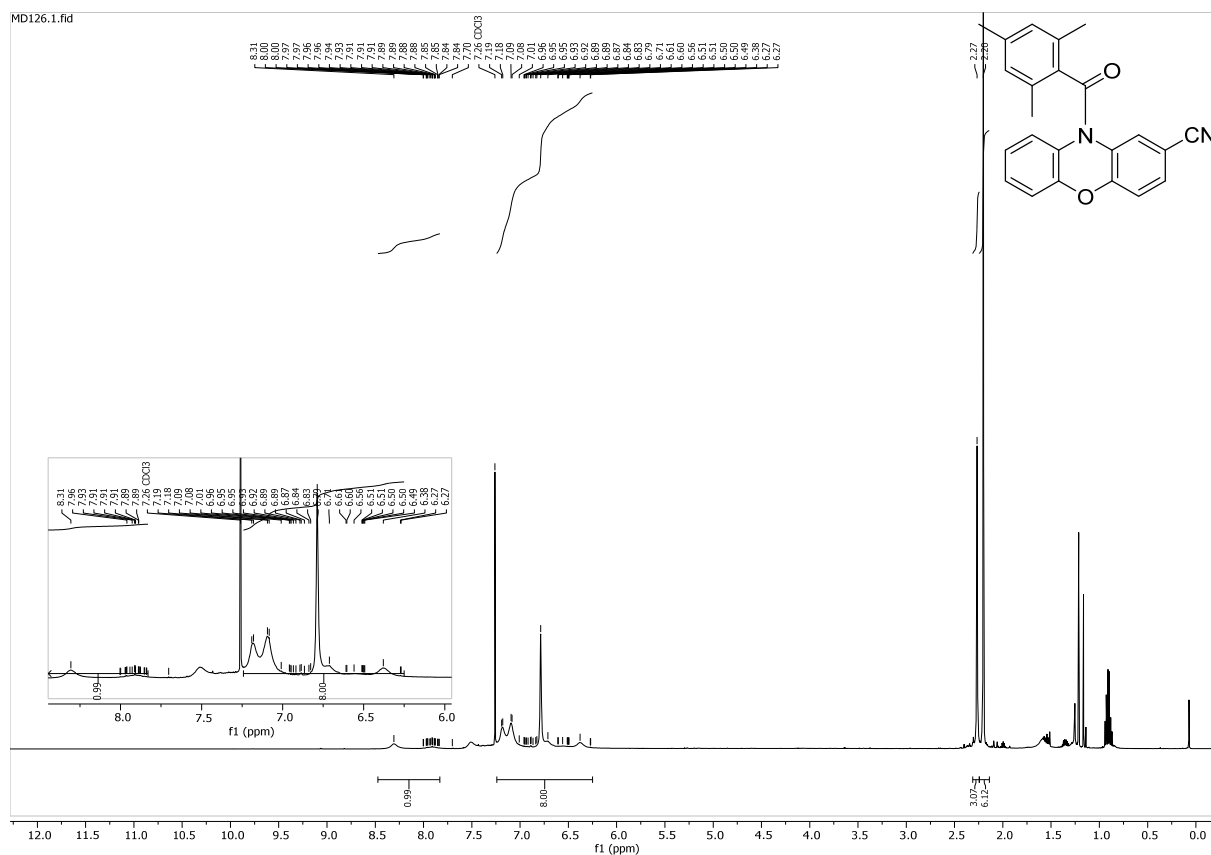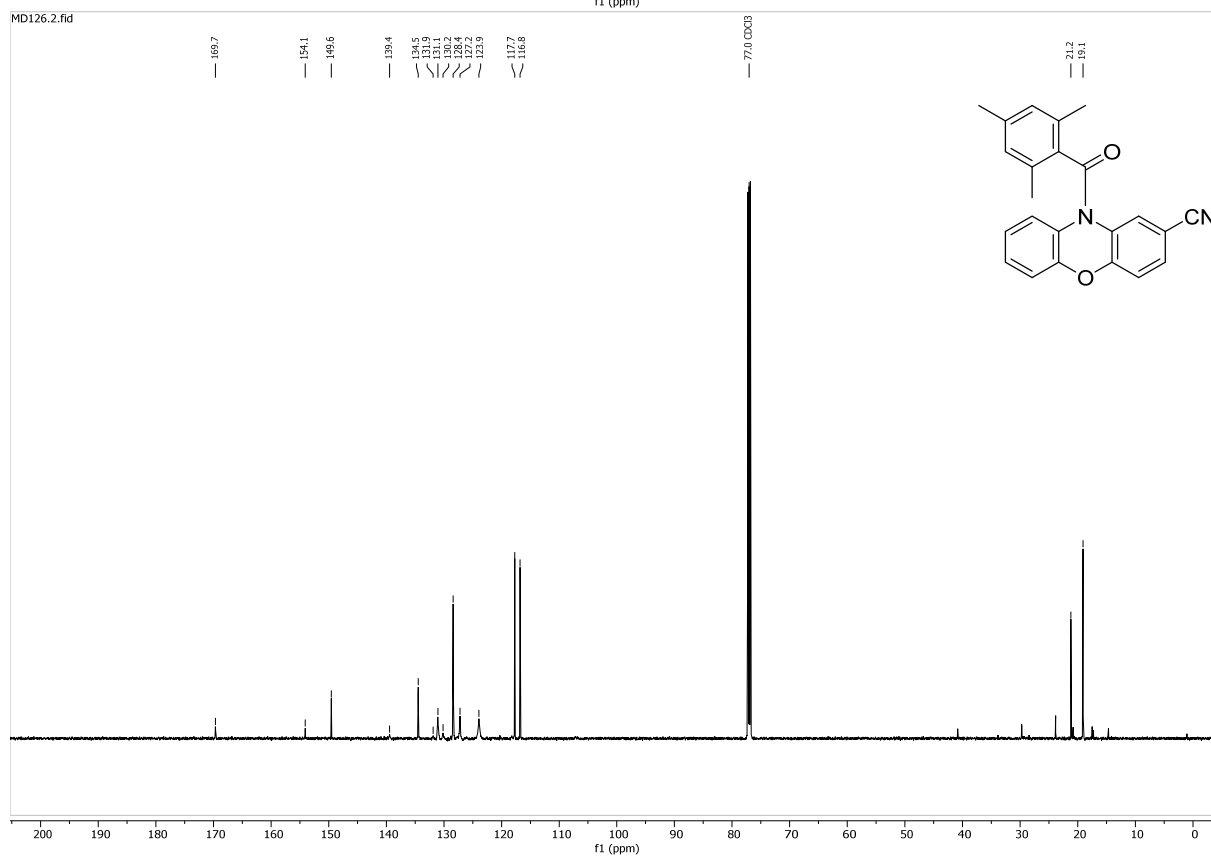

# (6*H*-Imidazo[4,5,1-*de*]phenazin-6-yl)(phenyl)methanone (3f)

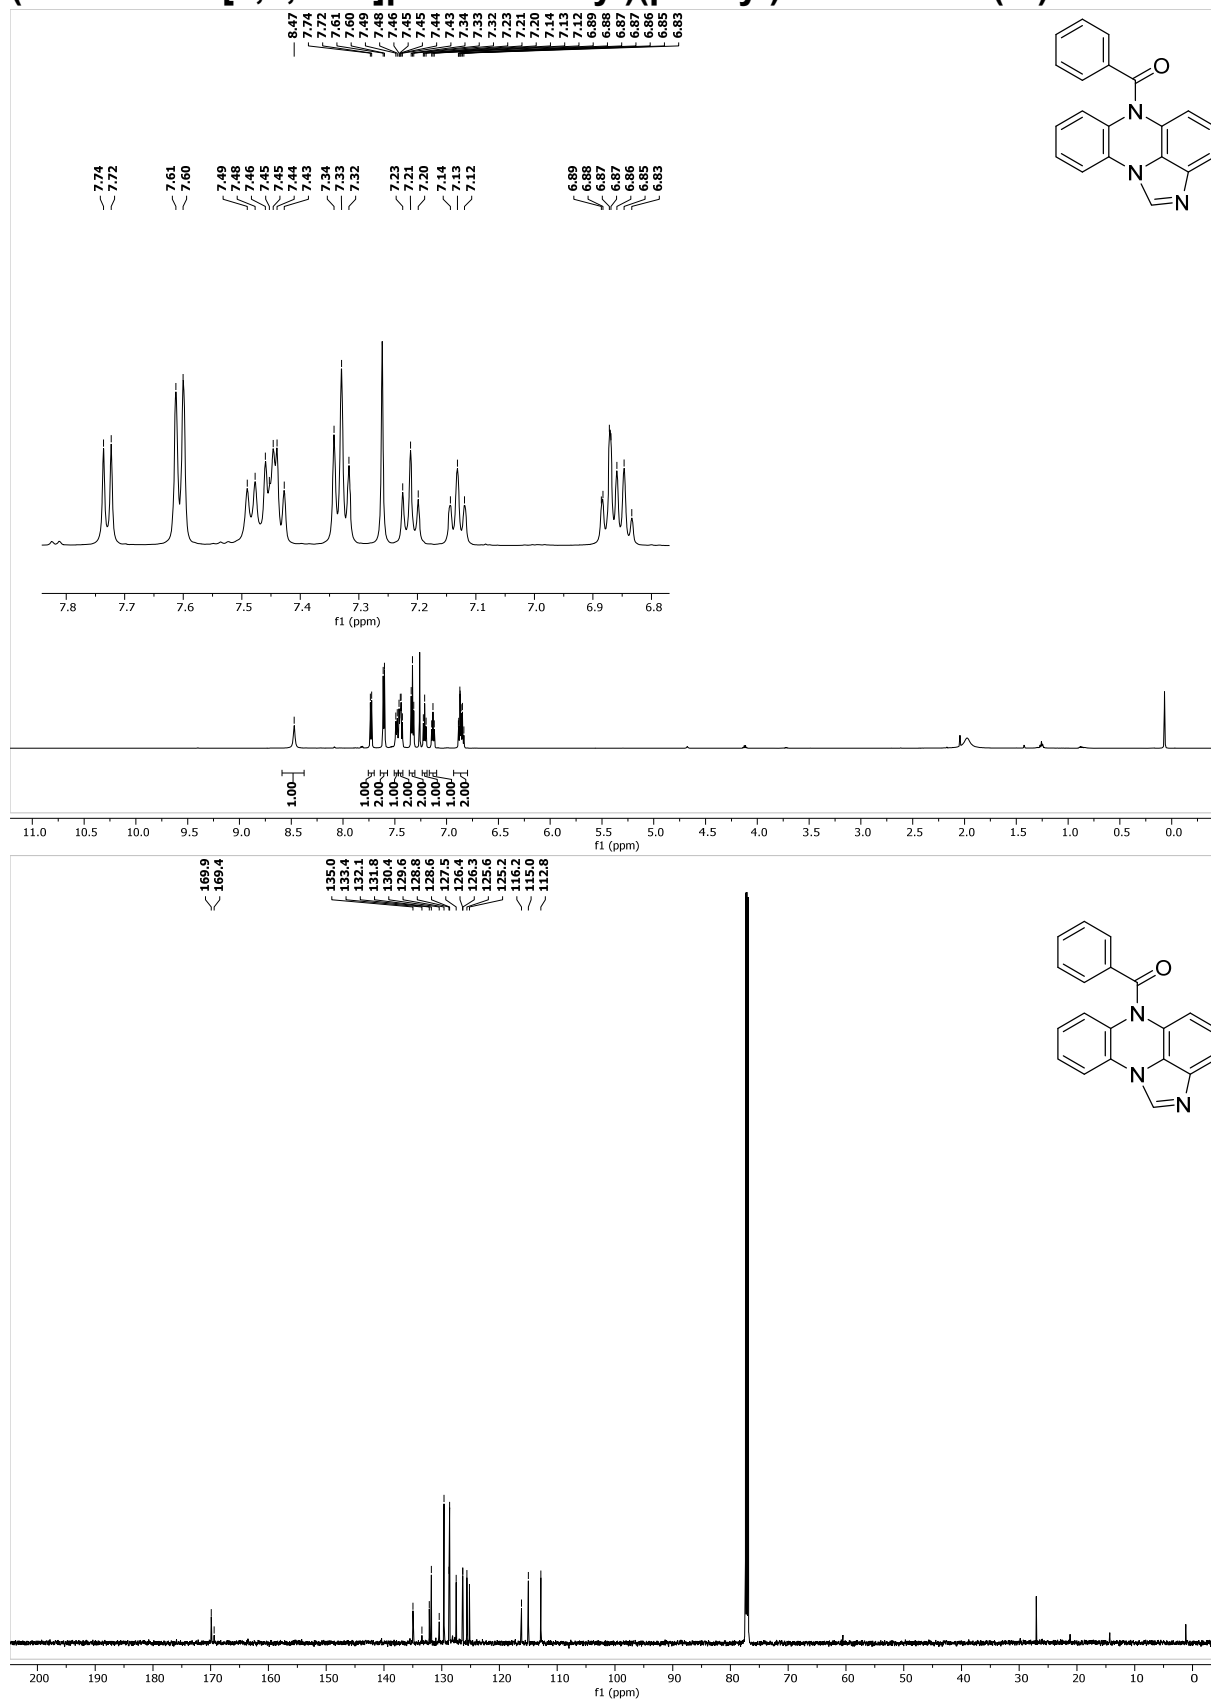

## Crystallographic data

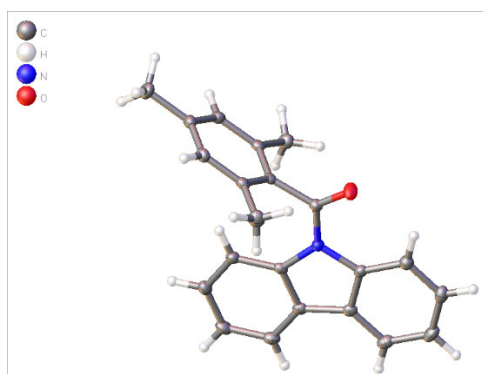

Table 1 Crystal data and structure refinement for ClamorN210312\_0m.

CCDC 2288546

|                                    |                                    |
|------------------------------------|------------------------------------|
| Identification code                | ClamorN210312_0m                   |
| Empirical formula                  | C <sub>22</sub> H <sub>19</sub> NO |
| Formula weight                     | 313.38                             |
| Temperature/K                      | 100.00                             |
| Crystal system                     | monoclinic                         |
| Space group                        | P2 <sub>1</sub> /n                 |
| a/Å                                | 10.4211(10)                        |
| b/Å                                | 9.3263(7)                          |
| c/Å                                | 17.4921(14)                        |
| α/°                                | 90                                 |
| β/°                                | 104.003(3)                         |
| γ/°                                | 90                                 |
| Volume/Å <sup>3</sup>              | 1649.5(2)                          |
| Z                                  | 4                                  |
| ρ <sub>calc</sub> /cm <sup>3</sup> | 1.262                              |
| μ/mm <sup>-1</sup>                 | 0.077                              |
| F(000)                             | 664.0                              |
| Crystal size/mm <sup>3</sup>       | 0.28 × 0.27 × 0.24                 |

|                                                |                                                                    |
|------------------------------------------------|--------------------------------------------------------------------|
| Radiation                                      | MoK $\alpha$ ( $\lambda = 0.71073$ )                               |
| 2 $\Theta$ range for data collection/ $^\circ$ | 4.8 to 54.202                                                      |
| Index ranges                                   | $-13 \leq h \leq 13$ , $-11 \leq k \leq 11$ , $-22 \leq l \leq 22$ |
| Reflections collected                          | 43124                                                              |
| Independent reflections                        | 3637 [ $R_{\text{int}} = 0.0694$ , $R_{\text{sigma}} = 0.0353$ ]   |
| Data/restraints/parameters                     | 3637/0/220                                                         |
| Goodness-of-fit on $F^2$                       | 1.030                                                              |
| Final R indexes [ $ I  \geq 2\sigma(I)$ ]      | $R_1 = 0.0429$ , $wR_2 = 0.1056$                                   |
| Final R indexes [all data]                     | $R_1 = 0.0520$ , $wR_2 = 0.1114$                                   |
| Largest diff. peak/hole / e $\text{\AA}^{-3}$  | 0.25/-0.31                                                         |

Table 2 Fractional Atomic Coordinates ( $\times 10^4$ ) and Equivalent Isotropic Displacement Parameters ( $\text{\AA}^2 \times 10^3$ ) for ClamorN210312\_0m.  $U_{\text{eq}}$  is defined as 1/3 of the trace of the orthogonalised  $U_{ij}$  tensor.

| Atom | x          | y          | z         | U(eq)   |
|------|------------|------------|-----------|---------|
| O1   | 4450.6(11) | 1114.6(11) | 2359.6(6) | 27.3(2) |
| N1   | 5780.5(10) | 1733.4(11) | 3539.4(6) | 15.2(2) |
| C1   | 6648.8(12) | 2636.2(14) | 4094.5(7) | 14.7(3) |
| C4   | 5761.7(12) | 358.0(13)  | 3893.7(7) | 15.4(3) |
| C14  | 5109.9(12) | 3535.7(13) | 2465.4(7) | 15.2(3) |
| C15  | 4253.9(12) | 4569.6(14) | 2640.5(7) | 16.1(3) |
| C3   | 6607.7(12) | 399.6(14)  | 4650.7(7) | 16.1(3) |
| C12  | 5052.6(13) | -872.2(14) | 3606.8(8) | 18.7(3) |
| C2   | 7162.8(12) | 1828.3(14) | 4776.5(7) | 16.0(3) |
| C5   | 7013.4(12) | 4063.1(14) | 4044.1(7) | 17.2(3) |
| C6   | 7892.2(13) | 4653.1(14) | 4697.4(8) | 19.3(3) |
| C13  | 5084.4(12) | 2040.6(14) | 2775.9(7) | 16.4(3) |

Table 2 Fractional Atomic Coordinates ( $\times 10^4$ ) and Equivalent Isotropic Displacement Parameters ( $\text{\AA}^2 \times 10^3$ ) for ClamorN210312\_0m.  $U_{\text{eq}}$  is defined as 1/3 of the trace of the orthogonalised  $U_{ij}$  tensor.

| Atom | x          | y           | z         | $U(\text{eq})$ |
|------|------------|-------------|-----------|----------------|
| C18  | 5810.1(13) | 5168.2(15)  | 1587.3(8) | 18.9(3)        |
| C16  | 4189.4(12) | 5898.3(14)  | 2272.4(7) | 18.0(3)        |
| C17  | 4959.4(13) | 6219.9(14)  | 1744.7(8) | 18.6(3)        |
| C9   | 6768.9(14) | -809.4(14)  | 5132.8(8) | 20.5(3)        |
| C8   | 8035.9(13) | 2444.9(15)  | 5423.9(8) | 20.0(3)        |
| C7   | 8395.8(13) | 3862.9(15)  | 5378.9(8) | 21.0(3)        |
| C10  | 6076.2(14) | -2040.0(14) | 4847.7(8) | 22.2(3)        |
| C19  | 5895.3(12) | 3817.3(14)  | 1935.8(7) | 17.1(3)        |
| C11  | 5227.7(14) | -2062.9(14) | 4098.9(8) | 21.4(3)        |
| C20  | 3446.6(14) | 4280.5(15)  | 3233.5(8) | 21.2(3)        |
| C22  | 6804.7(14) | 2689.1(16)  | 1745.2(9) | 25.3(3)        |
| C21  | 4872.3(15) | 7671.3(15)  | 1354.7(9) | 25.9(3)        |

Table 3 Anisotropic Displacement Parameters ( $\text{\AA}^2 \times 10^3$ ) for ClamorN210312\_0m. The Anisotropic displacement factor exponent takes the form:  $-2\pi^2[h^2a^2U_{11}+2hka^*b^*U_{12}+\dots]$ .

| Atom | $U_{11}$ | $U_{22}$ | $U_{33}$ | $U_{23}$ | $U_{13}$ | $U_{12}$ |
|------|----------|----------|----------|----------|----------|----------|
| O1   | 34.3(6)  | 21.0(5)  | 20.3(5)  | 1.0(4)   | -5.7(4)  | -9.2(4)  |
| N1   | 15.4(5)  | 13.0(5)  | 15.7(5)  | -0.4(4)  | 0.9(4)   | -0.9(4)  |
| C1   | 11.1(6)  | 17.6(6)  | 14.4(6)  | -2.5(5)  | 1.4(4)   | 1.5(5)   |
| C4   | 15.1(6)  | 15.0(6)  | 16.5(6)  | 1.6(5)   | 4.8(5)   | 3.0(5)   |
| C14  | 12.5(6)  | 16.4(6)  | 14.0(6)  | 0.1(5)   | -1.9(4)  | -1.9(5)  |
| C15  | 12.4(6)  | 19.8(6)  | 14.3(6)  | 0.4(5)   | -0.3(4)  | -1.5(5)  |
| C3   | 13.9(6)  | 18.3(6)  | 16.7(6)  | 0.2(5)   | 4.9(5)   | 3.6(5)   |
| C12  | 19.1(6)  | 17.6(6)  | 19.3(6)  | -0.8(5)  | 4.6(5)   | -0.8(5)  |



Table 3 Anisotropic Displacement Parameters ( $\text{\AA}^2 \times 10^3$ ) for ClamorN210312\_0m. The Anisotropic displacement factor exponent takes the form:  $-2\pi^2[h^2a^{*2}U_{11}+2hka^*b^*U_{12}+\dots]$ .

| Atom | $U_{11}$ | $U_{22}$ | $U_{33}$ | $U_{23}$ | $U_{13}$ | $U_{12}$ |
|------|----------|----------|----------|----------|----------|----------|
| C2   | 13.7(6)  | 18.3(6)  | 16.3(6)  | 0.4(5)   | 4.4(5)   | 3.4(5)   |
| C5   | 15.6(6)  | 16.6(6)  | 17.9(6)  | -0.1(5)  | 1.1(5)   | 1.1(5)   |
| C6   | 16.8(6)  | 17.3(6)  | 22.8(6)  | -3.5(5)  | 2.7(5)   | -1.0(5)  |
| C13  | 14.6(6)  | 17.9(6)  | 15.3(6)  | 0.4(5)   | 1.0(5)   | -0.8(5)  |
| C18  | 15.8(6)  | 22.3(7)  | 18.9(6)  | 1.8(5)   | 4.7(5)   | -3.0(5)  |
| C16  | 14.4(6)  | 18.7(6)  | 19.6(6)  | 0.5(5)   | 1.4(5)   | 1.6(5)   |
| C17  | 15.7(6)  | 18.3(6)  | 19.8(6)  | 3.4(5)   | 0.6(5)   | -2.2(5)  |
| C9   | 22.2(7)  | 22.0(7)  | 17.8(6)  | 3.5(5)   | 5.5(5)   | 5.8(5)   |
| C8   | 17.8(6)  | 24.1(7)  | 16.3(6)  | -0.4(5)  | 0.7(5)   | 3.3(5)   |
| C7   | 17.0(6)  | 25.1(7)  | 18.3(6)  | -5.9(5)  | -0.5(5)  | -0.1(5)  |
| C10  | 28.6(7)  | 17.4(6)  | 23.1(7)  | 5.5(5)   | 11.4(6)  | 4.7(5)   |
| C19  | 13.3(6)  | 19.1(6)  | 17.3(6)  | -1.7(5)  | 0.6(5)   | -1.4(5)  |
| C11  | 25.2(7)  | 15.8(6)  | 25.7(7)  | -1.2(5)  | 11.1(6)  | -1.4(5)  |
| C20  | 20.2(7)  | 22.7(7)  | 22.1(6)  | 3.1(5)   | 8.0(5)   | 1.1(5)   |
| C22  | 22.2(7)  | 23.6(7)  | 32.3(7)  | -1.8(6)  | 11.0(6)  | 1.6(6)   |
| C21  | 25.2(7)  | 21.8(7)  | 31.3(8)  | 8.7(6)   | 7.9(6)   | -0.2(6)  |

Table 4 Bond Lengths for ClamorN210312\_0m.

| Atom | Atom | Length/ $\text{\AA}$ | Atom | Atom | Length/ $\text{\AA}$ |
|------|------|----------------------|------|------|----------------------|
| O1   | C13  | 1.2163(16)           | C3   | C9   | 1.3937(18)           |
| N1   | C1   | 1.4302(15)           | C12  | C11  | 1.3897(18)           |
| N1   | C4   | 1.4268(16)           | C2   | C8   | 1.3936(18)           |
| N1   | C13  | 1.3867(16)           | C5   | C6   | 1.3931(18)           |
| C1   | C2   | 1.4030(17)           | C6   | C7   | 1.3917(19)           |

Table 4 Bond Lengths for ClamorN210312\_0m.

| Atom | Atom | Length/Å   | Atom | Atom | Length/Å   |
|------|------|------------|------|------|------------|
| C1   | C5   | 1.3927(18) | C18  | C17  | 1.3935(19) |
| C4   | C3   | 1.4026(17) | C18  | C19  | 1.3931(18) |
| C4   | C12  | 1.3910(18) | C16  | C17  | 1.3945(18) |
| C14  | C15  | 1.3969(18) | C17  | C21  | 1.5087(18) |
| C14  | C13  | 1.4990(17) | C9   | C10  | 1.383(2)   |
| C14  | C19  | 1.4014(18) | C8   | C7   | 1.382(2)   |
| C15  | C16  | 1.3906(18) | C10  | C11  | 1.392(2)   |
| C15  | C20  | 1.5096(18) | C19  | C22  | 1.5064(18) |
| C3   | C2   | 1.4480(18) |      |      |            |

Table 5 Bond Angles for ClamorN210312\_0m.

| Atom | Atom | Atom | Angle/°    | Atom | Atom | Atom | Angle/°    |
|------|------|------|------------|------|------|------|------------|
| C4   | N1   | C1   | 107.89(10) | C8   | C2   | C1   | 120.61(12) |
| C13  | N1   | C1   | 129.04(11) | C8   | C2   | C3   | 131.41(12) |
| C13  | N1   | C4   | 123.03(10) | C1   | C5   | C6   | 117.43(12) |
| C2   | C1   | N1   | 108.05(11) | C7   | C6   | C5   | 122.02(13) |
| C5   | C1   | N1   | 131.07(11) | O1   | C13  | N1   | 120.77(12) |
| C5   | C1   | C2   | 120.87(11) | O1   | C13  | C14  | 119.88(11) |
| C3   | C4   | N1   | 108.28(11) | N1   | C13  | C14  | 119.35(11) |
| C12  | C4   | N1   | 130.30(11) | C19  | C18  | C17  | 121.76(12) |
| C12  | C4   | C3   | 121.41(12) | C15  | C16  | C17  | 121.80(12) |
| C15  | C14  | C13  | 119.63(11) | C18  | C17  | C16  | 118.36(12) |
| C15  | C14  | C19  | 121.44(12) | C18  | C17  | C21  | 120.91(12) |
| C19  | C14  | C13  | 118.57(11) | C16  | C17  | C21  | 120.74(12) |
| C14  | C15  | C20  | 121.27(11) | C10  | C9   | C3   | 118.50(12) |

Table 5 Bond Angles for ClamorN210312\_0m.

| Atom | Atom | Atom | Angle/°    | Atom | Atom | Atom | Angle/°    |
|------|------|------|------------|------|------|------|------------|
| C16  | C15  | C14  | 118.40(12) | C7   | C8   | C2   | 118.77(12) |
| C16  | C15  | C20  | 120.31(12) | C8   | C7   | C6   | 120.28(12) |
| C4   | C3   | C2   | 107.80(11) | C9   | C10  | C11  | 120.62(12) |
| C9   | C3   | C4   | 120.34(12) | C14  | C19  | C22  | 120.98(12) |
| C9   | C3   | C2   | 131.86(12) | C18  | C19  | C14  | 118.24(12) |
| C11  | C12  | C4   | 117.19(12) | C18  | C19  | C22  | 120.78(12) |
| C1   | C2   | C3   | 107.97(11) | C12  | C11  | C10  | 121.93(13) |

Table 6 Torsion Angles for ClamorN210312\_0m.

| A  | B  | C   | D   | Angle/°     | A   | B   | C   | D   | Angle/°     |
|----|----|-----|-----|-------------|-----|-----|-----|-----|-------------|
| N1 | C1 | C2  | C3  | -0.21(13)   | C3  | C9  | C10 | C11 | -0.6(2)     |
| N1 | C1 | C2  | C8  | -179.40(11) | C12 | C4  | C3  | C2  | -178.47(12) |
| N1 | C1 | C5  | C6  | 179.82(12)  | C12 | C4  | C3  | C9  | 0.77(19)    |
| N1 | C4 | C3  | C2  | 0.31(13)    | C2  | C1  | C5  | C6  | -0.65(18)   |
| N1 | C4 | C3  | C9  | 179.55(11)  | C2  | C3  | C9  | C10 | 178.91(13)  |
| N1 | C4 | C12 | C11 | -179.11(12) | C2  | C8  | C7  | C6  | -0.04(19)   |
| C1 | N1 | C4  | C3  | -0.44(13)   | C5  | C1  | C2  | C3  | -179.84(11) |
| C1 | N1 | C4  | C12 | 178.20(13)  | C5  | C1  | C2  | C8  | 0.98(19)    |
| C1 | N1 | C13 | O1  | 175.08(12)  | C5  | C6  | C7  | C8  | 0.4(2)      |
| C1 | N1 | C13 | C14 | -5.34(19)   | C13 | N1  | C1  | C2  | -177.47(12) |
| C1 | C2 | C8  | C7  | -0.61(19)   | C13 | N1  | C1  | C5  | 2.1(2)      |
| C1 | C5 | C6  | C7  | 0.0(2)      | C13 | N1  | C4  | C3  | 177.59(11)  |
| C4 | N1 | C1  | C2  | 0.40(13)    | C13 | N1  | C4  | C12 | -3.8(2)     |
| C4 | N1 | C1  | C5  | 179.98(13)  | C13 | C14 | C15 | C16 | -172.72(11) |
| C4 | N1 | C13 | O1  | -2.51(19)   | C13 | C14 | C15 | C20 | 9.24(18)    |

Table 6 Torsion Angles for ClamorN210312\_0m.

| A   | B   | C   | D   | Angle/°     | A   | B   | C   | D   | Angle/°     |
|-----|-----|-----|-----|-------------|-----|-----|-----|-----|-------------|
| C4  | N1  | C13 | C14 | 177.07(11)  | C13 | C14 | C19 | C18 | 173.50(11)  |
| C4  | C3  | C2  | C1  | -0.06(14)   | C13 | C14 | C19 | C22 | -6.29(18)   |
| C4  | C3  | C2  | C8  | 179.00(13)  | C17 | C18 | C19 | C14 | -0.89(19)   |
| C4  | C3  | C9  | C10 | -0.12(19)   | C17 | C18 | C19 | C22 | 178.90(12)  |
| C4  | C12 | C11 | C10 | -0.1(2)     | C9  | C3  | C2  | C1  | -179.18(13) |
| C14 | C15 | C16 | C17 | -0.56(19)   | C9  | C3  | C2  | C8  | -0.1(2)     |
| C15 | C14 | C13 | O1  | 97.01(15)   | C9  | C10 | C11 | C12 | 0.8(2)      |
| C15 | C14 | C13 | N1  | -82.58(15)  | C19 | C14 | C15 | C16 | 0.30(18)    |
| C15 | C14 | C19 | C18 | 0.41(18)    | C19 | C14 | C15 | C20 | -177.75(12) |
| C15 | C14 | C19 | C22 | -179.38(12) | C19 | C14 | C13 | O1  | -76.21(16)  |
| C15 | C16 | C17 | C18 | 0.11(19)    | C19 | C14 | C13 | N1  | 104.21(14)  |
| C15 | C16 | C17 | C21 | -179.87(12) | C19 | C18 | C17 | C16 | 0.64(19)    |
| C3  | C4  | C12 | C11 | -0.62(19)   | C19 | C18 | C17 | C21 | -179.38(12) |
| C3  | C2  | C8  | C7  | -179.58(13) | C20 | C15 | C16 | C17 | 177.50(12)  |

Table 7 Hydrogen Atom Coordinates ( $\text{\AA} \times 10^4$ ) and Isotropic Displacement Parameters ( $\text{\AA}^2 \times 10^3$ ) for ClamorN210312\_0m.

| Atom | x       | y       | z       | U(eq) |
|------|---------|---------|---------|-------|
| H12  | 4472.96 | -897.43 | 3096.01 | 22    |
| H5   | 6675.87 | 4613.05 | 3582.02 | 21    |
| H6   | 8155.8  | 5624.68 | 4677.08 | 23    |
| H18  | 6346.35 | 5378.16 | 1232.91 | 23    |
| H16  | 3604.68 | 6606.41 | 2383.61 | 22    |
| H9   | 7341.73 | -788.77 | 5645.74 | 25    |
| H8   | 8377.33 | 1900.55 | 5887.58 | 24    |
| H7   | 8989.49 | 4299.99 | 5814.96 | 25    |

Table 7 Hydrogen Atom Coordinates ( $\text{\AA} \times 10^4$ ) and Isotropic Displacement Parameters ( $\text{\AA}^2 \times 10^3$ ) for ClamorN210312\_0m.

| Atom | x       | y        | z       | U(eq) |
|------|---------|----------|---------|-------|
| H10  | 6180.49 | -2877.49 | 5165.94 | 27    |
| H11  | 4754.37 | -2917.54 | 3918.93 | 26    |
| H20A | 3157.13 | 3277.72  | 3192.76 | 32    |
| H20B | 2671.16 | 4910.74  | 3127.06 | 32    |
| H20C | 3987.6  | 4465.49  | 3765.81 | 32    |
| H22A | 7454.54 | 2413.36  | 2227.67 | 38    |
| H22B | 7264.73 | 3073.42  | 1362.97 | 38    |
| H22C | 6286.5  | 1846.58  | 1520.94 | 38    |
| H21A | 5319    | 8385.62  | 1738.7  | 39    |
| H21B | 3941.35 | 7938.82  | 1157.9  | 39    |
| H21C | 5300.14 | 7632.29  | 914.05  | 39    |

Crystal structure determination of [ClamorN210312\_0m]

**Crystal Data** for  $\text{C}_{22}\text{H}_{19}\text{NO}$  ( $M = 313.38$  g/mol): monoclinic, space group  $P2_1/n$  (no. 14),  $a = 10.4211(10)$   $\text{\AA}$ ,  $b = 9.3263(7)$   $\text{\AA}$ ,  $c = 17.4921(14)$   $\text{\AA}$ ,  $\beta = 104.003(3)^\circ$ ,  $V = 1649.5(2)$   $\text{\AA}^3$ ,  $Z = 4$ ,  $T = 100.00$  K,  $\mu(\text{MoK}\alpha) = 0.077$   $\text{mm}^{-1}$ ,  $D_{\text{calc}} = 1.262$   $\text{g/cm}^3$ , 43124 reflections measured ( $4.8^\circ \leq 2\theta \leq 54.202^\circ$ ), 3637 unique ( $R_{\text{int}} = 0.0694$ ,  $R_{\text{sigma}} = 0.0353$ ) which were used in all calculations. The final  $R_1$  was 0.0429 ( $I > 2\sigma(I)$ ) and  $wR_2$  was 0.1114 (all data).

Refinement model description

Number of restraints - 0, number of constraints - unknown.

Details:

- |     |                |     |          |      |          |                                                                                          |
|-----|----------------|-----|----------|------|----------|------------------------------------------------------------------------------------------|
| 1.  |                |     | Fixed    |      |          | Uiso                                                                                     |
| At  |                | 1.2 |          |      | times    | of:                                                                                      |
| All |                |     | C(H)     |      |          | groups                                                                                   |
| At  |                | 1.5 |          |      | times    | of:                                                                                      |
| All |                |     | C(H,H,H) |      |          | groups                                                                                   |
| 2.a | Aromatic/amide | H   | refined  | with | riding   | coordinates:                                                                             |
|     |                |     |          |      |          | C12(H12), C5(H5), C6(H6), C18(H18), C16(H16), C9(H9), C8(H8), C7(H7), C10(H10), C11(H11) |
| 2.b | Idealised      | Me  | refined  | as   | rotating | group:                                                                                   |
|     |                |     |          |      |          | C20(H20A,H20B,H20C), C22(H22A,H22B,H22C), C21(H21A,H21B,H21C)                            |



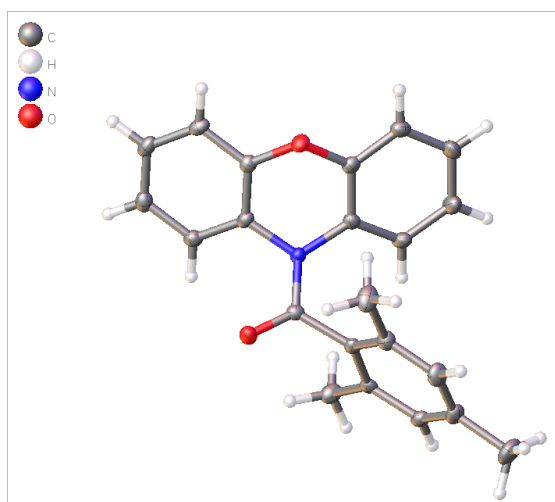

Table 1 Crystal data and structure refinement for DamrathM201007\_0m.

CCDC 2288547

|                                    |                                                 |
|------------------------------------|-------------------------------------------------|
| Empirical formula                  | C <sub>22</sub> H <sub>19</sub> NO <sub>2</sub> |
| Formula weight                     | 329.38                                          |
| Temperature/K                      | 100.0                                           |
| Crystal system                     | monoclinic                                      |
| Space group                        | P2 <sub>1</sub> /c                              |
| a/Å                                | 8.9727(5)                                       |
| b/Å                                | 12.4511(6)                                      |
| c/Å                                | 16.2174(9)                                      |
| α/°                                | 90                                              |
| β/°                                | 103.216(2)                                      |
| γ/°                                | 90                                              |
| Volume/Å <sup>3</sup>              | 1763.82(16)                                     |
| Z                                  | 4                                               |
| ρ <sub>calc</sub> /cm <sup>3</sup> | 1.240                                           |
| μ/mm <sup>-1</sup>                 | 0.079                                           |
| F(000)                             | 696.0                                           |

|                                             |                                                               |
|---------------------------------------------|---------------------------------------------------------------|
| Crystal size/mm <sup>3</sup>                | 0.19 × 0.18 × 0.14                                            |
| Radiation                                   | MoK $\alpha$ ( $\lambda$ = 0.71073)                           |
| 2 $\Theta$ range for data collection/°      | 4.166 to 52.732                                               |
| Index ranges                                | -11 ≤ h ≤ 11, -15 ≤ k ≤ 15, -20 ≤ l ≤ 20                      |
| Reflections collected                       | 40307                                                         |
| Independent reflections                     | 3607 [R <sub>int</sub> = 0.0678, R <sub>sigma</sub> = 0.0332] |
| Data/restraints/parameters                  | 3607/0/229                                                    |
| Goodness-of-fit on F <sup>2</sup>           | 1.051                                                         |
| Final R indexes [I ≥ 2 $\sigma$ (I)]        | R <sub>1</sub> = 0.0423, wR <sub>2</sub> = 0.1021             |
| Final R indexes [all data]                  | R <sub>1</sub> = 0.0548, wR <sub>2</sub> = 0.1090             |
| Largest diff. peak/hole / e Å <sup>-3</sup> | 0.23/-0.29                                                    |

Table 2 Fractional Atomic Coordinates ( $\times 10^4$ ) and Equivalent Isotropic Displacement Parameters ( $\text{\AA}^2 \times 10^3$ ) for DamrathM201007\_0m.  $U_{eq}$  is defined as 1/3 of the trace of the orthogonalised  $U_{ij}$  tensor.

| Atom | x          | y          | z          | U(eq)   |
|------|------------|------------|------------|---------|
| O1   | 4255.3(11) | 5932.2(8)  | 8281.7(6)  | 19.1(2) |
| O2   | 9101.6(11) | 5231.5(9)  | 8130.8(6)  | 21.1(2) |
| N1   | 6684.4(13) | 4675.9(9)  | 8116.0(7)  | 15.6(3) |
| C12  | 6709.0(16) | 5168.9(11) | 8921.3(9)  | 16.1(3) |
| C13  | 7926.2(16) | 4794.2(11) | 7752.2(9)  | 15.5(3) |
| C19  | 8421.3(16) | 3324.8(12) | 6795.1(9)  | 16.9(3) |
| C11  | 7884.4(17) | 5013.2(12) | 9634.9(9)  | 19.1(3) |
| C14  | 7797.1(16) | 4339.1(11) | 6878.6(9)  | 15.9(3) |
| C18  | 8352.5(16) | 2933.2(12) | 5984.3(9)  | 19.0(3) |
| C1   | 3974.3(16) | 5042.0(11) | 7752.3(9)  | 16.8(3) |
| C7   | 5468.1(17) | 5802.5(11) | 8978.2(9)  | 16.6(3) |
| C9   | 6600.3(18) | 6185.3(12) | 10426.0(9) | 21.0(3) |



|     |            |            |            |         |
|-----|------------|------------|------------|---------|
| C8  | 5406.7(17) | 6325.6(11) | 9724.2(9)  | 19.3(3) |
| C6  | 5172.9(16) | 4375.7(12) | 7659.2(9)  | 16.4(3) |
| C16 | 7137.7(18) | 4544.3(13) | 5369.2(9)  | 24.0(3) |
| C15 | 7161.3(17) | 4961.6(12) | 6168.9(9)  | 19.8(3) |
| C5  | 4845.1(17) | 3459.2(12) | 7164.6(9)  | 20.7(3) |
| C10 | 7824.2(18) | 5523.3(12) | 10388.1(9) | 21.3(3) |
| C17 | 7724.8(18) | 3533.3(13) | 5266.4(9)  | 22.7(3) |
| C22 | 9154.3(18) | 2671.2(12) | 7560.4(9)  | 22.8(3) |
| C2  | 2484.3(17) | 4838.2(12) | 7332.1(9)  | 20.7(3) |
| C4  | 3350.4(18) | 3264.9(13) | 6723.1(10) | 26.1(4) |
| C3  | 2182.2(18) | 3958.4(14) | 6797.3(10) | 25.8(4) |
| C20 | 6538(2)    | 6065.4(13) | 6268.9(11) | 29.7(4) |
| C21 | 7718(2)    | 3095.5(15) | 4397.6(10) | 33.9(4) |

Table 3 Anisotropic Displacement Parameters ( $\text{\AA}^2 \times 10^3$ ) for DamrathM201007\_0m. The Anisotropic displacement factor exponent takes the form:  $-2\pi^2[h^2a^*U_{11}+2hka^*b^*U_{12}+\dots]$ .

| Atom | U <sub>11</sub> | U <sub>22</sub> | U <sub>33</sub> | U <sub>23</sub> | U <sub>13</sub> | U <sub>12</sub> |
|------|-----------------|-----------------|-----------------|-----------------|-----------------|-----------------|
| O1   | 21.5(5)         | 16.5(5)         | 19.3(5)         | -1.6(4)         | 4.3(4)          | 3.6(4)          |
| O2   | 18.1(5)         | 26.8(6)         | 19.0(5)         | -2.9(4)         | 5.3(4)          | -5.1(4)         |
| N1   | 15.4(6)         | 17.1(6)         | 15.0(6)         | -2.3(5)         | 4.9(5)          | -1.6(5)         |
| C12  | 19.0(7)         | 14.9(7)         | 16.1(7)         | -1.8(5)         | 7.7(6)          | -2.7(5)         |
| C13  | 15.9(7)         | 14.7(7)         | 16.6(7)         | 2.1(5)          | 5.1(6)          | 1.4(5)          |
| C19  | 13.1(7)         | 20.6(7)         | 18.6(7)         | 0.8(6)          | 7.3(5)          | -2.3(6)         |
| C11  | 17.9(7)         | 20.1(7)         | 20.7(7)         | 0.2(6)          | 7.2(6)          | -0.7(6)         |
| C14  | 14.4(7)         | 18.7(7)         | 15.8(7)         | -0.4(6)         | 5.9(5)          | -4.0(5)         |
| C18  | 18.7(7)         | 19.7(7)         | 20.9(7)         | -2.3(6)         | 9.7(6)          | -2.5(6)         |
| C1   | 21.0(7)         | 15.5(7)         | 15.4(7)         | 1.2(5)          | 7.0(6)          | -0.9(6)         |

Table 3 Anisotropic Displacement Parameters ( $\text{\AA}^2 \times 10^3$ ) for DamrathM201007\_0m. The Anisotropic displacement factor exponent takes the form:  $-2\pi^2[h^2a^*2U_{11}+2hka^*b^*U_{12}+\dots]$ .

| Atom | U <sub>11</sub> | U <sub>22</sub> | U <sub>33</sub> | U <sub>23</sub> | U <sub>13</sub> | U <sub>12</sub> |
|------|-----------------|-----------------|-----------------|-----------------|-----------------|-----------------|
| C7   | 19.4(7)         | 14.3(7)         | 16.4(7)         | 1.5(6)          | 4.7(6)          | -1.1(6)         |
| C9   | 29.1(8)         | 18.1(7)         | 18.1(7)         | -3.7(6)         | 10.3(6)         | -5.7(6)         |
| C8   | 24.1(8)         | 14.5(7)         | 22.1(7)         | -1.2(6)         | 10.9(6)         | 0.2(6)          |
| C6   | 15.3(7)         | 19.1(7)         | 16.1(7)         | 1.2(5)          | 6.0(6)          | -2.1(6)         |
| C16  | 30.0(9)         | 24.7(8)         | 16.4(7)         | 5.1(6)          | 3.5(6)          | -2.7(7)         |
| C15  | 20.8(8)         | 18.6(7)         | 19.7(7)         | 1.6(6)          | 3.9(6)          | -2.4(6)         |
| C5   | 18.3(8)         | 20.6(8)         | 25.9(8)         | -4.0(6)         | 10.8(6)         | -2.2(6)         |
| C10  | 23.2(8)         | 23.4(8)         | 16.9(7)         | 0.5(6)          | 4.0(6)          | -5.3(6)         |
| C17  | 26.3(8)         | 26.8(8)         | 16.7(7)         | -1.1(6)         | 9.0(6)          | -5.8(6)         |
| C22  | 27.7(8)         | 21.5(8)         | 20.2(8)         | 2.5(6)          | 7.5(6)          | 4.1(6)          |
| C2   | 18.6(8)         | 23.9(8)         | 21.2(7)         | 1.5(6)          | 8.2(6)          | 2.1(6)          |
| C4   | 22.4(8)         | 27.5(8)         | 30.1(9)         | -11.4(7)        | 9.8(7)          | -7.3(7)         |
| C3   | 16.3(7)         | 35.2(9)         | 26.4(8)         | -4.9(7)         | 5.9(6)          | -6.8(7)         |
| C20  | 39.3(10)        | 21.5(8)         | 24.8(8)         | 2.1(7)          | 0.1(7)          | 4.8(7)          |
| C21  | 48.9(11)        | 37.1(10)        | 17.8(8)         | -2.3(7)         | 12.4(8)         | 0.5(8)          |

Table 4 Bond Lengths for DamrathM201007\_0m.

| Atom | Atom | Length/\AA | Atom | Atom | Length/\AA |
|------|------|------------|------|------|------------|
| O1   | C1   | 1.3894(17) | C18  | C17  | 1.390(2)   |
| O1   | C7   | 1.3871(18) | C1   | C6   | 1.394(2)   |
| O2   | C13  | 1.2205(17) | C1   | C2   | 1.378(2)   |
| N1   | C12  | 1.4388(17) | C7   | C8   | 1.386(2)   |
| N1   | C13  | 1.3826(18) | C9   | C8   | 1.384(2)   |
| N1   | C6   | 1.4382(18) | C9   | C10  | 1.386(2)   |

Table 4 Bond Lengths for DamrathM201007\_0m.

| Atom | Atom | Length/Å   | Atom | Atom | Length/Å |
|------|------|------------|------|------|----------|
| C12  | C11  | 1.390(2)   | C6   | C5   | 1.387(2) |
| C12  | C7   | 1.385(2)   | C16  | C15  | 1.393(2) |
| C13  | C14  | 1.5056(19) | C16  | C17  | 1.389(2) |
| C19  | C14  | 1.401(2)   | C15  | C20  | 1.506(2) |
| C19  | C18  | 1.390(2)   | C5   | C4   | 1.390(2) |
| C19  | C22  | 1.504(2)   | C17  | C21  | 1.510(2) |
| C11  | C10  | 1.389(2)   | C2   | C3   | 1.385(2) |
| C14  | C15  | 1.397(2)   | C4   | C3   | 1.384(2) |

Table 5 Bond Angles for DamrathM201007\_0m.

| Atom | Atom | Atom | Angle/°    | Atom | Atom | Atom | Angle/°    |
|------|------|------|------------|------|------|------|------------|
| C7   | O1   | C1   | 114.08(11) | C12  | C7   | O1   | 120.35(12) |
| C13  | N1   | C12  | 119.68(11) | C12  | C7   | C8   | 121.25(14) |
| C13  | N1   | C6   | 124.40(11) | C8   | C7   | O1   | 118.40(13) |
| C6   | N1   | C12  | 113.29(11) | C8   | C9   | C10  | 120.71(13) |
| C11  | C12  | N1   | 123.20(13) | C9   | C8   | C7   | 118.73(14) |
| C7   | C12  | N1   | 117.25(12) | C1   | C6   | N1   | 116.73(12) |
| C7   | C12  | C11  | 119.52(13) | C5   | C6   | N1   | 124.19(13) |
| O2   | C13  | N1   | 121.39(13) | C5   | C6   | C1   | 119.05(13) |
| O2   | C13  | C14  | 120.86(12) | C17  | C16  | C15  | 121.62(14) |
| N1   | C13  | C14  | 117.72(12) | C14  | C15  | C20  | 120.62(13) |
| C14  | C19  | C22  | 121.15(13) | C16  | C15  | C14  | 118.47(14) |
| C18  | C19  | C14  | 118.38(13) | C16  | C15  | C20  | 120.91(14) |
| C18  | C19  | C22  | 120.47(13) | C6   | C5   | C4   | 119.56(14) |
| C10  | C11  | C12  | 119.60(14) | C9   | C10  | C11  | 120.11(14) |

Table 5 Bond Angles for DamrathM201007\_0m.

| Atom | Atom | Atom | Angle/°    | Atom | Atom | Atom | Angle/°    |
|------|------|------|------------|------|------|------|------------|
| C19  | C14  | C13  | 118.94(12) | C18  | C17  | C21  | 120.15(15) |
| C15  | C14  | C13  | 119.71(13) | C16  | C17  | C18  | 118.61(13) |
| C15  | C14  | C19  | 121.18(13) | C16  | C17  | C21  | 121.22(14) |
| C17  | C18  | C19  | 121.71(14) | C1   | C2   | C3   | 118.95(14) |
| O1   | C1   | C6   | 120.42(13) | C3   | C4   | C5   | 120.49(14) |
| C2   | C1   | O1   | 118.09(13) | C4   | C3   | C2   | 120.27(14) |
| C2   | C1   | C6   | 121.48(13) |      |      |      |            |

Table 6 Torsion Angles for DamrathM201007\_0m.

| A   | B   | C   | D   | Angle/°     | A   | B   | C   | D   | Angle/°     |
|-----|-----|-----|-----|-------------|-----|-----|-----|-----|-------------|
| O1  | C1  | C6  | N1  | -1.57(19)   | C11 | C12 | C7  | C8  | 3.0(2)      |
| O1  | C1  | C6  | C5  | 176.31(12)  | C14 | C19 | C18 | C17 | 1.9(2)      |
| O1  | C1  | C2  | C3  | 179.60(13)  | C18 | C19 | C14 | C13 | -177.30(12) |
| O1  | C7  | C8  | C9  | 178.90(12)  | C18 | C19 | C14 | C15 | -2.0(2)     |
| O2  | C13 | C14 | C19 | 81.11(18)   | C1  | O1  | C7  | C12 | 32.20(17)   |
| O2  | C13 | C14 | C15 | -94.29(17)  | C1  | O1  | C7  | C8  | -148.18(13) |
| N1  | C12 | C11 | C10 | 179.71(13)  | C1  | C6  | C5  | C4  | 4.7(2)      |
| N1  | C12 | C7  | O1  | 0.86(19)    | C1  | C2  | C3  | C4  | 3.4(2)      |
| N1  | C12 | C7  | C8  | -178.75(13) | C7  | O1  | C1  | C6  | -31.81(17)  |
| N1  | C13 | C14 | C19 | -97.35(16)  | C7  | O1  | C1  | C2  | 147.70(13)  |
| N1  | C13 | C14 | C15 | 87.24(17)   | C7  | C12 | C11 | C10 | -2.1(2)     |
| N1  | C6  | C5  | C4  | -177.56(14) | C8  | C9  | C10 | C11 | 1.7(2)      |
| C12 | N1  | C13 | O2  | 6.3(2)      | C6  | N1  | C12 | C11 | 144.15(14)  |
| C12 | N1  | C13 | C14 | -175.23(12) | C6  | N1  | C12 | C7  | -34.05(17)  |
| C12 | N1  | C6  | C1  | 34.24(17)   | C6  | N1  | C13 | O2  | 166.68(13)  |

Table 6 Torsion Angles for DamrathM201007\_0m.

| A   | B   | C   | D   | Angle/°     | A   | B   | C   | D   | Angle/°     |
|-----|-----|-----|-----|-------------|-----|-----|-----|-----|-------------|
| C12 | N1  | C6  | C5  | -143.52(14) | C6  | N1  | C13 | C14 | -14.9(2)    |
| C12 | C11 | C10 | C9  | -0.2(2)     | C6  | C1  | C2  | C3  | -0.9(2)     |
| C12 | C7  | C8  | C9  | -1.5(2)     | C6  | C5  | C4  | C3  | -2.3(2)     |
| C13 | N1  | C12 | C11 | -53.41(19)  | C15 | C16 | C17 | C18 | -0.2(2)     |
| C13 | N1  | C12 | C7  | 128.39(14)  | C15 | C16 | C17 | C21 | -178.96(15) |
| C13 | N1  | C6  | C1  | -127.23(14) | C5  | C4  | C3  | C2  | -1.8(2)     |
| C13 | N1  | C6  | C5  | 55.0(2)     | C10 | C9  | C8  | C7  | -0.9(2)     |
| C13 | C14 | C15 | C16 | 176.30(13)  | C17 | C16 | C15 | C14 | 0.1(2)      |
| C13 | C14 | C15 | C20 | -2.8(2)     | C17 | C16 | C15 | C20 | 179.20(15)  |
| C19 | C14 | C15 | C16 | 1.0(2)      | C22 | C19 | C14 | C13 | 2.5(2)      |
| C19 | C14 | C15 | C20 | -178.08(14) | C22 | C19 | C14 | C15 | 177.87(13)  |
| C19 | C18 | C17 | C16 | -0.8(2)     | C22 | C19 | C18 | C17 | -177.98(13) |
| C19 | C18 | C17 | C21 | 177.97(14)  | C2  | C1  | C6  | N1  | 178.93(12)  |
| C11 | C12 | C7  | O1  | -177.41(13) | C2  | C1  | C6  | C5  | -3.2(2)     |

Table 7 Hydrogen Atom Coordinates ( $\text{\AA} \times 10^4$ ) and Isotropic Displacement Parameters ( $\text{\AA}^2 \times 10^3$ ) for DamrathM201007\_0m.

| Atom | x       | y       | z        | U(eq) |
|------|---------|---------|----------|-------|
| H11  | 8724.12 | 4560.53 | 9607.63  | 23    |
| H18  | 8744.74 | 2237.41 | 5919.49  | 23    |
| H9   | 6580.26 | 6546.81 | 10939.25 | 25    |
| H8   | 4561.47 | 6771.97 | 9753.22  | 23    |
| H16  | 6709.73 | 4961.29 | 4881.98  | 29    |
| H5   | 5637.12 | 2967.62 | 7127.95  | 25    |
| H10  | 8623.39 | 5418.2  | 10878.23 | 26    |
| H22A | 9914.59 | 3110.68 | 7945.71  | 34    |

Table 7 Hydrogen Atom Coordinates ( $\text{\AA} \times 10^4$ ) and Isotropic Displacement Parameters ( $\text{\AA}^2 \times 10^3$ ) for DamrathM201007\_0m.

| Atom | x       | y       | z       | U(eq) |
|------|---------|---------|---------|-------|
| H22B | 9657.92 | 2042.31 | 7382.35 | 34    |
| H22C | 8367.88 | 2434.66 | 7851.8  | 34    |
| H2   | 1677.21 | 5294.06 | 7408.03 | 25    |
| H4   | 3128.46 | 2651.57 | 6367.72 | 31    |
| H3   | 1169.15 | 3830.26 | 6480.06 | 31    |
| H20A | 5686.65 | 6008.95 | 6552.16 | 45    |
| H20B | 6174.39 | 6393    | 5709.52 | 45    |
| H20C | 7348.4  | 6512.46 | 6610.02 | 45    |
| H21A | 8744.64 | 2837.07 | 4385.96 | 51    |
| H21B | 7417.93 | 3664.96 | 3975.02 | 51    |
| H21C | 6987.1  | 2500.41 | 4267.68 | 51    |

Crystal structure determination of [DamrathM201007\_0m]

**Crystal Data** for  $\text{C}_{22}\text{H}_{19}\text{NO}_2$  ( $M = 329.38$  g/mol): monoclinic, space group  $P2_1/c$  (no. 14),  $a = 8.9727(5)$   $\text{\AA}$ ,  $b = 12.4511(6)$   $\text{\AA}$ ,  $c = 16.2174(9)$   $\text{\AA}$ ,  $\beta = 103.216(2)^\circ$ ,  $V = 1763.82(16)$   $\text{\AA}^3$ ,  $Z = 4$ ,  $T = 100.0$  K,  $\mu(\text{MoK}\alpha) = 0.079$   $\text{mm}^{-1}$ ,  $D_{\text{calc}} = 1.240$   $\text{g/cm}^3$ , 40307 reflections measured ( $4.166^\circ \leq 2\theta \leq 52.732^\circ$ ), 3607 unique ( $R_{\text{int}} = 0.0678$ ,  $R_{\text{sigma}} = 0.0332$ ) which were used in all calculations. The final  $R_1$  was 0.0423 ( $I > 2\sigma(I)$ ) and  $wR_2$  was 0.1090 (all data).

Refinement model description

Number of restraints - 0, number of constraints - unknown.

Details:

|     |                |    |          |             |                                                                         |
|-----|----------------|----|----------|-------------|-------------------------------------------------------------------------|
| 1.  |                |    | Fixed    |             | Uiso                                                                    |
| At  | 1.2            |    |          | times       | of:                                                                     |
| All |                |    | C(H)     |             | groups                                                                  |
| At  | 1.5            |    |          | times       | of:                                                                     |
| All |                |    | C(H,H,H) |             | groups                                                                  |
| 2.a | Aromatic/amide | H  | refined  | with riding | coordinates:                                                            |
|     |                |    |          |             | C11(H11), C18(H18), C9(H9), C8(H8), C16(H16), C5(H5), C10(H10), C2(H2), |
|     |                |    |          |             | C4(H4), C3(H3)                                                          |
| 2.b | Idealised      | Me | refined  | as rotating | group:                                                                  |
|     |                |    |          |             | C22(H22A,H22B,H22C), C20(H20A,H20B,H20C), C21(H21A,H21B,H21C)           |



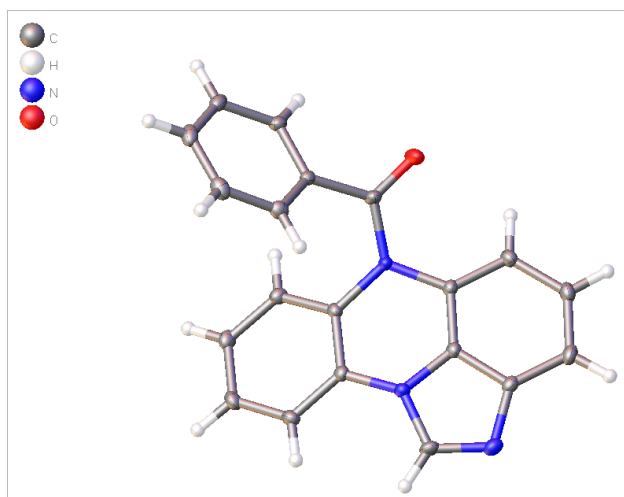

Table 1 Crystal data and structure refinement for KuczmeraT200917\_0m.

CCDC 2288548

|                                    |                                                  |
|------------------------------------|--------------------------------------------------|
| Identification code                | KuczmeraT200917_0m                               |
| Empirical formula                  | C <sub>20</sub> H <sub>13</sub> N <sub>3</sub> O |
| Formula weight                     | 311.33                                           |
| Temperature/K                      | 100.0                                            |
| Crystal system                     | monoclinic                                       |
| Space group                        | P2 <sub>1</sub> /c                               |
| a/Å                                | 10.0353(8)                                       |
| b/Å                                | 8.4931(8)                                        |
| c/Å                                | 17.5611(17)                                      |
| α/°                                | 90                                               |
| β/°                                | 99.888(3)                                        |
| γ/°                                | 90                                               |
| Volume/Å <sup>3</sup>              | 1474.5(2)                                        |
| Z                                  | 4                                                |
| ρ <sub>calc</sub> /cm <sup>3</sup> | 1.402                                            |
| μ/mm <sup>-1</sup>                 | 0.089                                            |
| F(000)                             | 648.0                                            |
| Crystal size/mm <sup>3</sup>       | 0.23 × 0.23 × 0.17                               |



|                                                |                                                                    |
|------------------------------------------------|--------------------------------------------------------------------|
| Radiation                                      | MoK $\alpha$ ( $\lambda = 0.71073$ )                               |
| 2 $\Theta$ range for data collection/ $^\circ$ | 4.708 to 60.996                                                    |
| Index ranges                                   | $-14 \leq h \leq 14$ , $-12 \leq k \leq 12$ , $-25 \leq l \leq 25$ |
| Reflections collected                          | 43235                                                              |
| Independent reflections                        | 4490 [ $R_{\text{int}} = 0.0431$ , $R_{\text{sigma}} = 0.0250$ ]   |
| Data/restraints/parameters                     | 4490/0/217                                                         |
| Goodness-of-fit on $F^2$                       | 1.046                                                              |
| Final R indexes [ $ I  \geq 2\sigma(I)$ ]      | $R_1 = 0.0457$ , $wR_2 = 0.1128$                                   |
| Final R indexes [all data]                     | $R_1 = 0.0595$ , $wR_2 = 0.1215$                                   |
| Largest diff. peak/hole / e $\text{\AA}^{-3}$  | 0.39/-0.36                                                         |

Table 2 Fractional Atomic Coordinates ( $\times 10^4$ ) and Equivalent Isotropic Displacement Parameters ( $\text{\AA}^2 \times 10^3$ ) for KuczmeraT200917\_0m.  $U_{\text{eq}}$  is defined as 1/3 of of the trace of the orthogonalised  $U_{ij}$  tensor.

| Atom | x          | y          | z         | U(eq)     |
|------|------------|------------|-----------|-----------|
| O1   | 5207.8(9)  | 6354.1(13) | 2226.8(5) | 25.9(2)   |
| N1   | 5742.4(9)  | 8032.1(12) | 4949.1(5) | 13.35(19) |
| C1   | 6477.8(12) | 8683.2(14) | 5612.5(6) | 16.5(2)   |
| N2   | 7760.5(10) | 8900.1(12) | 5572.0(6) | 17.5(2)   |
| C2   | 7914.8(11) | 8301.8(13) | 4848.9(6) | 14.6(2)   |
| N3   | 5021.9(9)  | 6631.1(12) | 3495.4(5) | 13.24(19) |
| C3   | 9045.8(12) | 8065.0(14) | 4490.6(7) | 17.3(2)   |
| C4   | 8817.6(12) | 7308.1(15) | 3779.8(7) | 17.9(2)   |
| C5   | 7530.7(12) | 6786.9(14) | 3405.2(7) | 15.8(2)   |
| C6   | 6411.9(11) | 7023.2(13) | 3758.1(6) | 13.0(2)   |
| C7   | 6666.2(11) | 7771.7(13) | 4468.7(6) | 12.7(2)   |
| C8   | 4187.8(11) | 6439.6(13) | 4079.2(6) | 12.5(2)   |

Table 2 Fractional Atomic Coordinates ( $\times 10^4$ ) and Equivalent Isotropic Displacement Parameters ( $\text{\AA}^2 \times 10^3$ ) for KuczmeraT200917\_0m.  $U_{eq}$  is defined as 1/3 of the trace of the orthogonalised  $U_{ij}$  tensor.

| Atom | x          | y          | z         | $U_{eq}$ |
|------|------------|------------|-----------|----------|
| C9   | 3063.1(11) | 5448.7(13) | 3956.2(6) | 15.0(2)  |
| C10  | 2196.9(11) | 5367.3(14) | 4494.4(7) | 16.7(2)  |
| C11  | 2480.1(12) | 6213.8(15) | 5180.1(7) | 17.3(2)  |
| C12  | 3651.6(12) | 7109.3(14) | 5340.2(6) | 15.4(2)  |
| C13  | 4499.8(11) | 7219.0(13) | 4795.0(6) | 12.5(2)  |
| C14  | 4489.6(12) | 6615.4(14) | 2707.0(6) | 15.2(2)  |
| C15  | 3026.5(11) | 7018.1(13) | 2467.3(6) | 12.8(2)  |
| C16  | 2269.4(11) | 6179.1(14) | 1859.3(6) | 14.9(2)  |
| C17  | 917.6(12)  | 6568.3(15) | 1606.0(7) | 17.9(2)  |
| C18  | 338.2(12)  | 7808.7(15) | 1945.9(7) | 20.0(2)  |
| C19  | 1099.8(13) | 8668.9(14) | 2538.4(7) | 19.5(2)  |
| C20  | 2440.6(12) | 8268.2(13) | 2803.8(7) | 16.1(2)  |

Table 3 Anisotropic Displacement Parameters ( $\text{\AA}^2 \times 10^3$ ) for KuczmeraT200917\_0m. The Anisotropic displacement factor exponent takes the form:  $-2\pi^2[h^2a^2U_{11}+2hka^*b^*U_{12}+\dots]$ .

| Atom | $U_{11}$ | $U_{22}$ | $U_{33}$ | $U_{23}$ | $U_{13}$ | $U_{12}$ |
|------|----------|----------|----------|----------|----------|----------|
| O1   | 16.8(4)  | 48.6(6)  | 12.6(4)  | -5.5(4)  | 3.2(3)   | 4.7(4)   |
| N1   | 12.1(4)  | 17.5(5)  | 10.3(4)  | -1.9(3)  | 1.6(3)   | -0.2(3)  |
| C1   | 17.9(5)  | 19.3(5)  | 11.3(5)  | -3.2(4)  | -0.7(4)  | -0.7(4)  |
| N2   | 16.6(5)  | 20.1(5)  | 14.4(4)  | -1.2(4)  | -1.3(3)  | -1.1(4)  |
| C2   | 12.8(5)  | 16.0(5)  | 14.1(5)  | 1.4(4)   | -0.5(4)  | -0.2(4)  |
| N3   | 10.3(4)  | 20.4(5)  | 9.0(4)   | -2.1(3)  | 1.7(3)   | -1.1(3)  |
| C3   | 10.9(5)  | 20.5(5)  | 19.6(5)  | 3.6(4)   | 0.2(4)   | -0.8(4)  |
| C4   | 12.9(5)  | 22.5(6)  | 19.1(5)  | 3.4(4)   | 5.1(4)   | 1.6(4)   |

Table 3 Anisotropic Displacement Parameters ( $\text{\AA}^2 \times 10^3$ ) for KuczmeraT200917\_0m. The Anisotropic displacement factor exponent takes the form:  $-2\pi^2[h^2a^*2U_{11}+2hka^*b^*U_{12}+\dots]$ .

| Atom | $U_{11}$ | $U_{22}$ | $U_{33}$ | $U_{23}$ | $U_{13}$ | $U_{12}$ |
|------|----------|----------|----------|----------|----------|----------|
| C5   | 14.5(5)  | 19.6(5)  | 13.8(5)  | -0.1(4)  | 4.1(4)   | 2.1(4)   |
| C6   | 10.8(5)  | 15.6(5)  | 12.3(5)  | 0.6(4)   | 1.2(4)   | 0.5(4)   |
| C7   | 10.9(5)  | 15.2(5)  | 11.8(5)  | 1.0(4)   | 1.6(4)   | 0.7(4)   |
| C8   | 11.6(5)  | 15.1(5)  | 11.0(5)  | 0.9(4)   | 2.7(4)   | 1.3(4)   |
| C9   | 15.5(5)  | 15.5(5)  | 13.4(5)  | 0.8(4)   | 0.9(4)   | -2.0(4)  |
| C10  | 14.5(5)  | 17.5(5)  | 17.8(5)  | 4.0(4)   | 2.0(4)   | -2.4(4)  |
| C11  | 15.7(5)  | 21.0(5)  | 16.5(5)  | 3.7(4)   | 6.6(4)   | 0.9(4)   |
| C12  | 16.3(5)  | 18.9(5)  | 11.5(5)  | 0.1(4)   | 3.5(4)   | 1.6(4)   |
| C13  | 10.7(5)  | 14.3(5)  | 12.3(5)  | 0.7(4)   | 1.1(4)   | 1.1(4)   |
| C14  | 13.6(5)  | 21.1(5)  | 10.5(5)  | -2.3(4)  | 0.5(4)   | 0.0(4)   |
| C15  | 12.1(5)  | 15.8(5)  | 10.4(5)  | 0.8(4)   | 1.8(4)   | -1.3(4)  |
| C16  | 15.8(5)  | 18.1(5)  | 10.6(5)  | 0.0(4)   | 1.5(4)   | -1.1(4)  |
| C17  | 14.9(5)  | 23.7(6)  | 13.9(5)  | 4.3(4)   | -0.5(4)  | -3.8(4)  |
| C18  | 13.7(5)  | 24.9(6)  | 21.3(6)  | 10.3(5)  | 2.9(4)   | 2.0(4)   |
| C19  | 20.3(6)  | 16.2(5)  | 24.0(6)  | 4.2(4)   | 9.1(5)   | 4.0(4)   |
| C20  | 18.6(5)  | 14.0(5)  | 16.2(5)  | -0.6(4)  | 4.3(4)   | -1.7(4)  |

Table 4 Bond Lengths for KuczmeraT200917\_0m.

| Atom | Atom | Length/ $\text{\AA}$ | Atom | Atom | Length/ $\text{\AA}$ |
|------|------|----------------------|------|------|----------------------|
| O1   | C14  | 1.2202(14)           | C6   | C7   | 1.3846(15)           |
| N1   | C1   | 1.3828(14)           | C8   | C9   | 1.3947(15)           |
| N1   | C7   | 1.3743(14)           | C8   | C13  | 1.4074(15)           |
| N1   | C13  | 1.4104(14)           | C9   | C10  | 1.3913(16)           |
| C1   | N2   | 1.3143(16)           | C10  | C11  | 1.3893(17)           |

Table 4 Bond Lengths for KuczmeraT200917\_0m.

| Atom | Atom | Length/Å   | Atom | Atom | Length/Å   |
|------|------|------------|------|------|------------|
| N2   | C2   | 1.4009(15) | C11  | C12  | 1.3879(17) |
| C2   | C3   | 1.4034(16) | C12  | C13  | 1.3893(15) |
| C2   | C7   | 1.3897(15) | C14  | C15  | 1.4959(15) |
| N3   | C6   | 1.4313(14) | C15  | C16  | 1.3951(15) |
| N3   | C8   | 1.4398(14) | C15  | C20  | 1.3934(16) |
| N3   | C14  | 1.3957(14) | C16  | C17  | 1.3929(16) |
| C3   | C4   | 1.3878(17) | C17  | C18  | 1.3868(18) |
| C4   | C5   | 1.4158(16) | C18  | C19  | 1.3883(19) |
| C5   | C6   | 1.3870(15) | C19  | C20  | 1.3886(17) |

Table 5 Bond Angles for KuczmeraT200917\_0m.

| Atom | Atom | Atom | Angle/°    | Atom | Atom | Atom | Angle/°    |
|------|------|------|------------|------|------|------|------------|
| C1   | N1   | C13  | 133.15(10) | C9   | C8   | C13  | 118.17(10) |
| C7   | N1   | C1   | 105.24(9)  | C13  | C8   | N3   | 121.03(10) |
| C7   | N1   | C13  | 118.08(9)  | C10  | C9   | C8   | 120.54(10) |
| N2   | C1   | N1   | 113.36(10) | C11  | C10  | C9   | 120.29(11) |
| C1   | N2   | C2   | 105.07(9)  | C12  | C11  | C10  | 119.95(11) |
| N2   | C2   | C3   | 133.02(11) | C11  | C12  | C13  | 119.68(10) |
| C7   | C2   | N2   | 108.79(10) | C8   | C13  | N1   | 117.10(10) |
| C7   | C2   | C3   | 118.04(10) | C12  | C13  | N1   | 121.78(10) |
| C6   | N3   | C8   | 116.76(9)  | C12  | C13  | C8   | 121.02(10) |
| C14  | N3   | C6   | 120.52(9)  | O1   | C14  | N3   | 121.09(10) |
| C14  | N3   | C8   | 122.34(9)  | O1   | C14  | C15  | 120.98(10) |
| C4   | C3   | C2   | 116.64(10) | N3   | C14  | C15  | 117.84(10) |
| C3   | C4   | C5   | 124.00(11) | C16  | C15  | C14  | 118.54(10) |

Table 5 Bond Angles for KuczmeraT200917\_0m.

| Atom | Atom | Atom | Angle/°    | Atom | Atom | Atom | Angle/°    |
|------|------|------|------------|------|------|------|------------|
| C6   | C5   | C4   | 119.40(11) | C20  | C15  | C14  | 121.34(10) |
| C5   | C6   | N3   | 129.88(10) | C20  | C15  | C16  | 119.98(10) |
| C7   | C6   | N3   | 114.58(9)  | C17  | C16  | C15  | 119.72(11) |
| C7   | C6   | C5   | 115.54(10) | C18  | C17  | C16  | 120.00(11) |
| N1   | C7   | C2   | 107.49(9)  | C17  | C18  | C19  | 120.32(11) |
| N1   | C7   | C6   | 126.01(10) | C18  | C19  | C20  | 119.97(11) |
| C6   | C7   | C2   | 126.38(10) | C19  | C20  | C15  | 119.97(11) |
| C9   | C8   | N3   | 120.79(10) |      |      |      |            |

Table 6 Torsion Angles for KuczmeraT200917\_0m.

| A  | B   | C   | D   | Angle/°     | A   | B   | C   | D   | Angle/°     |
|----|-----|-----|-----|-------------|-----|-----|-----|-----|-------------|
| O1 | C14 | C15 | C16 | 42.07(17)   | C7  | N1  | C1  | N2  | 2.37(13)    |
| O1 | C14 | C15 | C20 | -133.75(13) | C7  | N1  | C13 | C8  | -12.01(15)  |
| N1 | C1  | N2  | C2  | -2.42(14)   | C7  | N1  | C13 | C12 | 164.33(10)  |
| C1 | N1  | C7  | C2  | -1.25(12)   | C7  | C2  | C3  | C4  | -0.19(16)   |
| C1 | N1  | C7  | C6  | 174.89(11)  | C8  | N3  | C6  | C5  | 156.27(12)  |
| C1 | N1  | C13 | C8  | -167.29(12) | C8  | N3  | C6  | C7  | -24.72(14)  |
| C1 | N1  | C13 | C12 | 9.05(19)    | C8  | N3  | C14 | O1  | -160.05(12) |
| C1 | N2  | C2  | C3  | -173.69(13) | C8  | N3  | C14 | C15 | 23.32(16)   |
| C1 | N2  | C2  | C7  | 1.52(13)    | C8  | C9  | C10 | C11 | -3.25(17)   |
| N2 | C2  | C3  | C4  | 174.67(12)  | C9  | C8  | C13 | N1  | 171.17(10)  |
| N2 | C2  | C7  | N1  | -0.13(13)   | C9  | C8  | C13 | C12 | -5.20(16)   |
| N2 | C2  | C7  | C6  | -176.25(11) | C9  | C10 | C11 | C12 | -1.87(18)   |
| C2 | C3  | C4  | C5  | 0.47(18)    | C10 | C11 | C12 | C13 | 3.34(17)    |
| N3 | C6  | C7  | N1  | 5.76(16)    | C11 | C12 | C13 | N1  | -175.96(11) |

Table 6 Torsion Angles for KuczmeraT200917\_0m.

| A  | B   | C   | D   | Angle/°     | A   | B   | C   | D   | Angle/°     |
|----|-----|-----|-----|-------------|-----|-----|-----|-----|-------------|
| N3 | C6  | C7  | C2  | -178.82(10) | C11 | C12 | C13 | C8  | 0.24(17)    |
| N3 | C8  | C9  | C10 | -174.65(10) | C13 | N1  | C1  | N2  | 159.89(12)  |
| N3 | C8  | C13 | N1  | -7.51(15)   | C13 | N1  | C7  | C2  | -162.81(10) |
| N3 | C8  | C13 | C12 | 176.12(10)  | C13 | N1  | C7  | C6  | 13.33(16)   |
| N3 | C14 | C15 | C16 | -141.30(11) | C13 | C8  | C9  | C10 | 6.68(16)    |
| N3 | C14 | C15 | C20 | 42.89(16)   | C14 | N3  | C6  | C5  | -30.64(18)  |
| C3 | C2  | C7  | N1  | 175.90(10)  | C14 | N3  | C6  | C7  | 148.37(11)  |
| C3 | C2  | C7  | C6  | -0.22(18)   | C14 | N3  | C8  | C9  | 34.95(16)   |
| C3 | C4  | C5  | C6  | -0.36(19)   | C14 | N3  | C8  | C13 | -146.41(11) |
| C4 | C5  | C6  | N3  | 178.95(11)  | C14 | C15 | C16 | C17 | -177.68(10) |
| C4 | C5  | C6  | C7  | -0.05(16)   | C14 | C15 | C20 | C19 | 176.34(11)  |
| C5 | C6  | C7  | N1  | -175.09(11) | C15 | C16 | C17 | C18 | 1.48(17)    |
| C5 | C6  | C7  | C2  | 0.34(17)    | C16 | C15 | C20 | C19 | 0.59(17)    |
| C6 | N3  | C8  | C9  | -152.09(11) | C16 | C17 | C18 | C19 | 0.07(18)    |
| C6 | N3  | C8  | C13 | 26.54(15)   | C17 | C18 | C19 | C20 | -1.30(18)   |
| C6 | N3  | C14 | O1  | 27.26(17)   | C18 | C19 | C20 | C15 | 0.96(17)    |
| C6 | N3  | C14 | C15 | -149.38(11) | C20 | C15 | C16 | C17 | -1.81(17)   |

Table 7 Hydrogen Atom Coordinates ( $\text{\AA} \times 10^4$ ) and Isotropic Displacement Parameters ( $\text{\AA}^2 \times 10^3$ ) for KuczmeraT200917\_0m.

| Atom | x       | y       | z       | U(eq) |
|------|---------|---------|---------|-------|
| H1   | 6093.68 | 8947.58 | 6053.89 | 20    |
| H3   | 9923.41 | 8405.6  | 4723.07 | 21    |
| H4   | 9570.79 | 7128.8  | 3529.14 | 21    |
| H5   | 7434.43 | 6279.91 | 2916.65 | 19    |
| H9   | 2886.95 | 4824.2  | 3501.23 | 18    |

Table 7 Hydrogen Atom Coordinates ( $\text{\AA} \times 10^4$ ) and Isotropic Displacement Parameters ( $\text{\AA}^2 \times 10^3$ ) for KuczmeraT200917\_0m.

| Atom | x       | y       | z       | U(eq) |
|------|---------|---------|---------|-------|
| H10  | 1408.3  | 4730.06 | 4392.54 | 20    |
| H11  | 1872.22 | 6179.67 | 5539.12 | 21    |
| H12  | 3872.46 | 7644.55 | 5820.35 | 19    |
| H16  | 2674.13 | 5345.87 | 1619.17 | 18    |
| H17  | 392.51  | 5984.08 | 1200.29 | 21    |
| H18  | -584.2  | 8070.98 | 1772.44 | 24    |
| H19  | 703.68  | 9531.16 | 2762.26 | 23    |
| H20  | 2958.28 | 8846.2  | 3214.56 | 19    |

Crystal structure determination of [KuczmeraT200917\_0m]

**Crystal Data** for  $\text{C}_{20}\text{H}_{13}\text{N}_3\text{O}$  ( $M = 311.33$  g/mol): monoclinic, space group  $P2_1/c$  (no. 14),  $a = 10.0353(8)$   $\text{\AA}$ ,  $b = 8.4931(8)$   $\text{\AA}$ ,  $c = 17.5611(17)$   $\text{\AA}$ ,  $\beta = 99.888(3)^\circ$ ,  $V = 1474.5(2)$   $\text{\AA}^3$ ,  $Z = 4$ ,  $T = 100.0$  K,  $\mu(\text{MoK}\alpha) = 0.089$   $\text{mm}^{-1}$ ,  $D_{\text{calc}} = 1.402$   $\text{g/cm}^3$ , 43235 reflections measured ( $4.708^\circ \leq 2\theta \leq 60.996^\circ$ ), 4490 unique ( $R_{\text{int}} = 0.0431$ ,  $R_{\text{sigma}} = 0.0250$ ) which were used in all calculations. The final  $R_1$  was 0.0457 ( $I > 2\sigma(I)$ ) and  $wR_2$  was 0.1215 (all data).

Refinement model description

Number of restraints - 0, number of constraints - unknown.

Details:

|     |                |       |                     |                                                                                                                        |
|-----|----------------|-------|---------------------|------------------------------------------------------------------------------------------------------------------------|
| 1.  |                | Fixed |                     | Uiso                                                                                                                   |
| At  | 1.2            |       | times               | of:                                                                                                                    |
| All |                | C(H)  |                     | groups                                                                                                                 |
| 2.a | Aromatic/amide | H     | refined with riding | coordinates:                                                                                                           |
|     |                |       |                     | C1(H1), C3(H3), C4(H4), C5(H5), C9(H9), C10(H10), C11(H11), C12(H12), C16(H16), C17(H17), C18(H18), C19(H19), C20(H20) |

References

- Boelke, A.; Kuczmera, T. J.; Caspers, L. D.; Lork, E.; Nachtsheim, B. J. *Org. Lett.* **2020**, *22*, 7261–7266. doi:10.1021/acs.orglett.0c02593
- Jiang, M.; Guo, J.; Liu, B.; Tan, Q.; Xu, B. *Org. Lett.* **2019**, *21*, 8328–8333. doi:10.1021/acs.orglett.9b03106
- Li, E.; Xu, X.; Li, H.; Zhang, H.; Xu, X.; Yuan, X.; Li, Y. *Tetrahedron* **2009**, *65*, 8961–8968. doi:10.1016/j.tet.2009.08.075

4. Kehl, A.; Schupp, N.; Breising, V. M.; Schollmeyer, D.; Waldvogel, S. R. *Chem. Eur. J.* **2020**, *26*, 15847–15851. doi:10.1002/chem.202003430
5. Spratt, M. P.; Dorn, H. C. *Anal. Chem.* **1984**, *56*, 2038–2043. doi:10.1021/ac00276a014
6. Li, H.; Li, H.; Gu, J.; He, F.; Peng, H.; Tao, Y.; Tian, D.; Yang, Q.; Li, P.; Zheng, C.; Huang, W.; Chen, R. *Chem. Sci.* **2021**, *12*, 3580–3586. doi:10.1039/D0SC06025A
7. Lu, C.; Markina, N. A.; Larock, R. C. *J. Org. Chem.* **2012**, *77*, 11153–11160. doi:10.1021/jo3021727
8. Cai, S.; Shi, H.; Li, J.; Gu, L.; Ni, Y.; Cheng, Z.; Wang, S.; Xiong, W.-W.; Li, L.; An, Z.; Huang, W. *Adv. Mater.* **2017**, *29*, 1701244. doi:10.1002/adma.201701244
9. Kayama, S.; Tabata, H.; Takahashi, Y.; Tani, N.; Wakamatsu, S.; Oshitari, T.; Natsugari, H.; Takahashi, H. *Tetrahedron* **2015**, *71*, 7046–7053. doi:10.1016/j.tet.2015.06.097
10. Buchspies, J.; Rahman, M. M.; Szostak, R.; Szostak, M. *Org. Lett.* **2020**, *22*, 4703–4709. doi:10.1021/acs.orglett.0c01488
11. Liu, Y.; Zhan, G.; Fang, P.; Liu, Z.; Bian, Z.; Huang, C. *J. Mater. Chem. C* **2017**, *5*, 12547–12552. doi:10.1039/C7TC04634K
12. Liu, Z.; Larock, R. C. *Org. Lett.* **2004**, *6*, 3739–3741. doi:10.1021/ol048564l
13. Day, C. S.; Ton, S. J.; Kausler, C.; Vrønning Hoffmann, D.; Skrydstrup, T. *Angew. Chem. Int. Ed. Engl.* **2023**, *62*, e202308238. doi:10.1002/anie.202308238
14. Damrath, M.; Caspers, L. D.; Duvinage, D.; Nachtsheim, B. J. *Org. Lett.* **2022**, *24*, 2562–2566. doi:10.1021/acs.orglett.2c00691
